# Supplementary material for: Association between adiposity after diagnosis of prostate cancer and mortality: systematic review and meta-analysis
Source: PubMed Central journal article supplement — BMJ Med. 2023 Jun 25;2(1):e000339. doi: 10.1136/bmjmed-2022-000339 (PMC10568122; doi:10.1136/bmjmed-2022-000339), 2023-06-25
Supplement: bmjmed-2022-000339supp001.pdf [file bmjmed-2022-000339supp001.pdf]

## SUPPLEMENTARY MATERIAL

### Association between adiposity after diagnosis of prostate cancer and mortality: systematic review and meta-analysis

#### Table of Contents

|                                                                                                                                                                                                                                                                                                                                                                                               |    |
|-----------------------------------------------------------------------------------------------------------------------------------------------------------------------------------------------------------------------------------------------------------------------------------------------------------------------------------------------------------------------------------------------|----|
| Supplementary Table 1: PRISMA 2020 Checklist .....                                                                                                                                                                                                                                                                                                                                            | 6  |
| APPENDIX 1: BMI and waist circumference and primary outcomes (all-cause mortality and PCa-specific mortality) .....                                                                                                                                                                                                                                                                           | 13 |
| SUPPLEMENTARY TABLES .....                                                                                                                                                                                                                                                                                                                                                                    | 13 |
| Supplementary Table 2 Commonly reported mean or median BMI values for the specific category range from relevant literature.....                                                                                                                                                                                                                                                               | 13 |
| Supplementary Table 3 Main characteristics of studies with post diagnosis data on BMI included in any analysis of all-cause or PCa-specific mortality .....                                                                                                                                                                                                                                   | 15 |
| Supplementary Table 4A Studies excluded from the linear dose-response meta-analysis of post diagnosis BMI and all-cause mortality .....                                                                                                                                                                                                                                                       | 29 |
| Supplementary Table 4B Studies excluded from the categorical meta-analysis of BMI and all-cause mortality .....                                                                                                                                                                                                                                                                               | 30 |
| Supplementary Table 4C Studies excluded from the linear dose-response meta-analysis of BMI and PCa-specific mortality .....                                                                                                                                                                                                                                                                   | 30 |
| Supplementary Table 4D Studies excluded from the categorical meta-analysis of BMI and PCa-specific mortality .....                                                                                                                                                                                                                                                                            | 31 |
| Supplementary Table 5 Hazard ratios (95% CI) for non-linear analysis of post-diagnosis BMI and all-cause mortality.....                                                                                                                                                                                                                                                                       | 35 |
| Supplementary Table 6 Categorical meta-analyses of BMI and mortality outcomes, summary of main results .....                                                                                                                                                                                                                                                                                  | 36 |
| Supplementary Table 7 Hazard ratios (95% CI) for non-linear analysis of post-diagnosis BMI and PCa-specific mortality. ....                                                                                                                                                                                                                                                                   | 37 |
| Supplementary Table 8 Linear dose-response subgroup meta-analyses of BMI (per 5 kg/m <sup>2</sup> ) and all-cause mortality.....                                                                                                                                                                                                                                                              | 38 |
| Supplementary Table 9 Linear dose-response subgroup meta-analyses of BMI (per 5 kg/m <sup>2</sup> ) and PCa-specific mortality. ....                                                                                                                                                                                                                                                          | 41 |
| Supplementary Table 10. Regression tests for funnel plot asymmetry in meta-analyses that included more than 10 studies (Egger's and Debray's test) .....                                                                                                                                                                                                                                      | 44 |
| SUPPLEMENTARY FIGURES.....                                                                                                                                                                                                                                                                                                                                                                    | 45 |
| Supplementary Figure 1 Non-Linear meta-analysis for the association between BMI A) and all-cause mortality and B) PCa-specific mortality using midpoint values for open ended categories obtained from the literature (with 95% confidence intervals and 95% prediction intervals of the curve). ....                                                                                         | 45 |
| Supplementary Figure 2 A) Relation between BMI and all-cause mortality with the estimated trend of the natural logarithm of HR according to BMI level in each included study of high risk/advanced PCa and B) Non-linear association between post-diagnosis BMI and all-cause mortality; C) Relation between BMI and all-cause mortality with the estimated trend of the natural logarithm of |    |

|                                                                                                                                                                                                                                                                                                                                     |    |
|-------------------------------------------------------------------------------------------------------------------------------------------------------------------------------------------------------------------------------------------------------------------------------------------------------------------------------------|----|
| HR according to BMI level in each included study of risk groups one/two/three and D) Non-linear association between post-diagnosis BMI and all-cause mortality in groups one/two/three.....                                                                                                                                         | 46 |
| Supplementary Figure 3 Influence (leave-one-out) analysis for postdiagnosis BMI and A) all-cause mortality and B) PCa-specific mortality .....                                                                                                                                                                                      | 47 |
| Categorical meta-analyses (all-cause mortality) .....                                                                                                                                                                                                                                                                               | 48 |
| Supplementary Figure 4 Summary hazard ratio estimate (95% CI) of A) all-cause mortality comparing overweight versus normal weight men with PCa B) Sensitivity (leave one out analysis). .....                                                                                                                                       | 48 |
| Supplementary Figure 5 Funnel plot of studies included in the categorical analysis of overweight versus normal weight men with PCa for all-cause mortality. ....                                                                                                                                                                    | 49 |
| Supplementary Figure 6 A) Summary hazard ratio estimate (95% CI) of all-cause mortality comparing obese versus normal weight men with PCa B) Sensitivity (leave one out analysis).....                                                                                                                                              | 50 |
| Supplementary Figure 7 Funnel plot of studies included in the categorical analysis of obese versus normal weight men with PCa for all-cause mortality. ....                                                                                                                                                                         | 51 |
| Supplementary Figure 8 A) Relation between BMI and PCa-specific mortality with the estimated trend of the natural logarithm of HR according to BMI level in each included study of risk groups one/two/three and B) Non-linear association between post-diagnosis BMI and PCa-specific mortality in risk groups one/two/three. .... | 52 |
| Categorical meta-analyses (PCa-specific mortality).....                                                                                                                                                                                                                                                                             | 53 |
| Supplementary Figure 9 A) Summary hazard ratio estimate (95% CI) of PCa-specific mortality comparing overweight versus normal weight men with PCa B) Sensitivity (leave one out analysis). .....                                                                                                                                    | 53 |
| Supplementary Figure 10 Funnel plot of studies included in the categorical analysis of overweight versus normal weight men with PCa and risk of PCa-specific mortality.....                                                                                                                                                         | 54 |
| Supplementary Figure 11 A) Summary hazard ratio estimate (95% CI) of PCa-specific mortality comparing obese versus normal weight men with PCa B) Sensitivity (leave one out analysis).....                                                                                                                                          | 55 |
| Supplementary Figure 12 Funnel plot of studies included in the categorical analysis of obese versus normal weight men with PCa and risk of PCa-specific mortality.....                                                                                                                                                              | 56 |
| Linear dose-response subgroup meta-analyses (BMI and all-cause mortality) .....                                                                                                                                                                                                                                                     | 57 |
| Supplementary Figure 13 Summary hazard ratio estimate (95% CI) of all-cause mortality for postdiagnosis 5 kg/m <sup>2</sup> BMI increments for A) studies that included underweight groups and B) studies that excluded the underweight groups. ....                                                                                | 57 |
| Supplementary Figure 14 Summary hazard ratio estimate (95% CI) of all-cause mortality for post-diagnosis 5 kg/m <sup>2</sup> BMI increments by study design retrospective cohort versus prospective cohort. ....                                                                                                                    | 58 |
| Supplementary Figure 15 Summary hazard ratio estimate (95% CI) of all-cause mortality for post-diagnosis 5 kg/m <sup>2</sup> BMI increments number of median deaths.....                                                                                                                                                            | 59 |
| Supplementary Figure 16 Summary hazard ratio estimate (95% CI) of all-cause mortality for post-diagnosis 5 kg/m <sup>2</sup> BMI increments by method of anthropometry assessment. ....                                                                                                                                             | 60 |
| Supplementary Figure 17 Summary hazard ratio estimate (95% CI) of all-cause mortality for post-diagnosis 5 kg/m <sup>2</sup> BMI increments by median follow-up time 10 years. ....                                                                                                                                                 | 61 |
| Supplementary Figure 18 Summary hazard ratio estimate (95% CI) of all-cause mortality for post-diagnosis 5 kg/m <sup>2</sup> BMI increments by geographic location of study. ....                                                                                                                                                   | 62 |

|                                                                                                                                                                                                                                                                                                                                                                                                                                                  |    |
|--------------------------------------------------------------------------------------------------------------------------------------------------------------------------------------------------------------------------------------------------------------------------------------------------------------------------------------------------------------------------------------------------------------------------------------------------|----|
| Supplementary Figure 19 Summary hazard ratio estimate (95% CI) of all-cause mortality for post-diagnosis 5 kg/m <sup>2</sup> BMI increments by geographic location of study among the studies in “group 4” (advanced/metastatic). .....                                                                                                                                                                                                          | 63 |
| Supplementary Figure 20 Summary hazard ratio estimate (95% CI) of all-cause mortality for post-diagnosis 5 kg/m <sup>2</sup> BMI increments by tumour risk groups (group one: low risk/early stage, group two: Mixed PCa i.e., low, and high risk could include metastatic or not, group three: Mixed PCa i.e., low, and high risk but state excludes advanced/metastatic, group four: Advanced/High risk PCa and could include metastatic. .... | 64 |
| Supplementary Figure 21 Summary hazard ratio estimate (95% CI) of all-cause mortality for post-diagnosis 5 kg/m <sup>2</sup> BMI increments for adjustment level one: adjusted at least for age, stage and grade (clinical risk/state).....                                                                                                                                                                                                      | 65 |
| Supplementary Figure 22 Summary hazard ratio estimate (95% CI) of all-cause mortality for post-diagnosis 5 kg/m <sup>2</sup> BMI increments for adjustment level two: adjusted at least for age, stage OR grade (clinical risk/state).....                                                                                                                                                                                                       | 65 |
| Supplementary Figure 23 Summary hazard ratio estimate (95% CI) of all-cause mortality for post-diagnosis 5 kg/m <sup>2</sup> BMI increments for adjustment level three: adjusted at least for age, stage, grade (clinical risk/state) and treatment (any). ....                                                                                                                                                                                  | 66 |
| Supplementary Figure 24 Summary hazard ratio estimate (95% CI) of all-cause mortality for post-diagnosis 5 kg/m <sup>2</sup> BMI increments for adjustment level four: age, stage, grade (clinical risk/state), treatment (any) and smoking. ....                                                                                                                                                                                                | 66 |
| Supplementary Figure 25 Summary hazard ratio estimate (95% CI) of all-cause mortality for post-diagnosis 5 kg/m <sup>2</sup> BMI increments for adjustment level five: age, stage, grade, treatment (any), smoking and PSA test (PSA levels as proxy). ....                                                                                                                                                                                      | 66 |
| Supplementary Figure 26 Summary hazard ratio estimate (95% CI) of all-cause mortality for post-diagnosis 5 kg/m <sup>2</sup> BMI increments by individual confounders: Accounted for age (yes vs no). ....                                                                                                                                                                                                                                       | 67 |
| Supplementary Figure 27 Summary hazard ratio estimate (95% CI) of all-cause mortality for post-diagnosis 5 kg/m <sup>2</sup> BMI increments by individual confounders: Accounted for stage (yes vs no). ..                                                                                                                                                                                                                                       | 68 |
| Supplementary Figure 28 Summary hazard ratio estimate (95% CI) of all-cause mortality for post-diagnosis 5 kg/m <sup>2</sup> BMI increments by individual confounders: Accounted for Gleason score (yes vs no). ....                                                                                                                                                                                                                             | 69 |
| Supplementary Figure 29 Summary hazard ratio estimate (95% CI) of all-cause mortality for post-diagnosis 5 kg/m <sup>2</sup> BMI increments by individual confounders: Accounted for treatments (yes vs no). ....                                                                                                                                                                                                                                | 70 |
| Supplementary Figure 30 Summary hazard ratio estimate (95% CI) of all-cause mortality for post-diagnosis 5 kg/m <sup>2</sup> BMI increments by individual confounders: Accounted for smoking (yes vs no). ....                                                                                                                                                                                                                                   | 71 |
| Supplementary Figure 31 Summary hazard ratio estimate (95% CI) of all-cause mortality for post-diagnosis 5 kg/m <sup>2</sup> BMI increments by individual confounders: Accounted for PSA test/PSA levels (yes vs no). ....                                                                                                                                                                                                                       | 72 |
| Linear dose-response subgroup meta-analyses (BMI and PCa-specific mortality) .....                                                                                                                                                                                                                                                                                                                                                               | 73 |
| Supplementary Figure 32 Summary hazard ratio estimate (95% CI) of PCa-specific mortality for postdiagnosis 5 kg/m <sup>2</sup> BMI increments for A) studies that included underweight groups and B) studies that excluded the underweight groups. ....                                                                                                                                                                                          | 73 |
| Supplementary Figure 33 Summary hazard ratio estimate (95% CI) of PCa-specific mortality for post-diagnosis 5 kg/m <sup>2</sup> BMI increments by study design. ....                                                                                                                                                                                                                                                                             | 74 |

|                                                                                                                                                                                                                                                                                                                                                                                                                                                     |    |
|-----------------------------------------------------------------------------------------------------------------------------------------------------------------------------------------------------------------------------------------------------------------------------------------------------------------------------------------------------------------------------------------------------------------------------------------------------|----|
| Supplementary Figure 34 Summary hazard ratio estimate (95% CI) of PCa-specific mortality for post-diagnosis 5 kg/m <sup>2</sup> BMI increments by median deaths. ....                                                                                                                                                                                                                                                                               | 75 |
| Supplementary Figure 35 Summary hazard ratio estimate (95% CI) of PCa-specific mortality for post-diagnosis 5 kg/m <sup>2</sup> BMI increments by method of anthropometry assessment.....                                                                                                                                                                                                                                                           | 76 |
| Supplementary Figure 36 Summary hazard ratio estimate (95% CI) of PCa-specific mortality for post-diagnosis 5 kg/m <sup>2</sup> BMI increments by median follow-up (10 years). ....                                                                                                                                                                                                                                                                 | 77 |
| Supplementary Figure 37 Summary hazard ratio estimate (95% CI) of PCa-specific mortality for post-diagnosis 5 kg/m <sup>2</sup> BMI increments by geographic location of study. ....                                                                                                                                                                                                                                                                | 78 |
| Supplementary Figure 38 Summary hazard ratio estimate (95% CI) of PCa-specific mortality for post-diagnosis 5 kg/m <sup>2</sup> BMI increments by geographic location of study among the studies in “group 4” (advanced/metastatic).....                                                                                                                                                                                                            | 79 |
| Supplementary Figure 39 Summary hazard ratio estimate (95% CI) of PCa-specific mortality for post-diagnosis 5 kg/m <sup>2</sup> BMI increments by tumour risk groups (group one: low risk/early stage, group two: Mixed PCa i.e., low, and high risk could include metastatic or not, group three: Mixed PCa i.e., low, and high risk but state excludes advanced/metastatic, group four: Advanced/High risk PCa and could include metastatic. .... | 80 |
| Supplementary Figure 40 Summary hazard ratio estimate (95% CI) of PCa-specific mortality for post-diagnosis 5 kg/m <sup>2</sup> BMI increments for adjustment level one: adjusted at least for age, stage and grade (clinical risk/state). ....                                                                                                                                                                                                     | 81 |
| Supplementary Figure 41 Summary hazard ratio estimate (95% CI) of PCa-specific mortality for post-diagnosis 5 kg/m <sup>2</sup> BMI increments for adjustment level two: adjusted at least for age, stage OR grade (clinical risk/state). ....                                                                                                                                                                                                      | 81 |
| Supplementary Figure 42 Summary hazard ratio estimate (95% CI) of PCa-specific mortality for post-diagnosis 5 kg/m <sup>2</sup> BMI increments for adjustment level three: adjusted at least for age, stage, grade (clinical risk/state) and treatment (any).....                                                                                                                                                                                   | 82 |
| Supplementary Figure 43 Summary hazard ratio estimate (95% CI) of PCa-specific mortality for post-diagnosis 5 kg/m <sup>2</sup> BMI increments for adjustment level four: age, stage, grade (clinical risk/state), treatment (any) and smoking.....                                                                                                                                                                                                 | 82 |
| Supplementary Figure 44 Summary hazard ratio estimate (95% CI) of PCa-specific mortality for post-diagnosis 5 kg/m <sup>2</sup> BMI increments for adjustment level five: age, stage, grade, treatment (any), smoking and PSA test (PSA levels as proxy).....                                                                                                                                                                                       | 82 |
| Supplementary Figure 45 Summary hazard ratio estimate (95% CI) of PCa-specific mortality for post-diagnosis 5 kg/m <sup>2</sup> BMI increments by individual confounders: Accounted for age (yes vs no). ....                                                                                                                                                                                                                                       | 83 |
| Supplementary Figure 46 Summary hazard ratio estimate (95% CI) of PCa-specific mortality for post-diagnosis 5 kg/m <sup>2</sup> BMI increments by individual confounders: Accounted for stage (yes vs no). ....                                                                                                                                                                                                                                     | 84 |
| Supplementary Figure 47 Summary hazard ratio estimate (95% CI) of PCa-specific mortality for post-diagnosis 5 kg/m <sup>2</sup> BMI increments by individual confounders: Accounted for Gleason score (yes vs no). ....                                                                                                                                                                                                                             | 85 |
| Supplementary Figure 48 Summary hazard ratio estimate (95% CI) of PCa-specific mortality for post-diagnosis 5 kg/m <sup>2</sup> BMI increments by individual confounders: Accounted for treatments (yes vs no).....                                                                                                                                                                                                                                 | 86 |

|                                                                                                                                                                                                                                                      |    |
|------------------------------------------------------------------------------------------------------------------------------------------------------------------------------------------------------------------------------------------------------|----|
| Supplementary Figure 49 Summary hazard ratio estimate (95% CI) of PCa-specific mortality for post-diagnosis 5 kg/m <sup>2</sup> BMI increments by individual confounders: Accounted for smoking (yes vs no).....                                     | 87 |
| Supplementary Figure 50 Summary hazard ratio estimate (95% CI) of PCa-specific mortality for post-diagnosis 5 kg/m <sup>2</sup> BMI increments by individual confounders: Accounted for PSA test/PSA levels (yes vs no).....                         | 88 |
| Waist circumference and all-cause and PCa-specific mortality.....                                                                                                                                                                                    | 89 |
| Supplementary Figure 51 Summary hazard ratio estimate (95% CI) for post-diagnosis 10 cm increments of waist circumference for A) all-cause mortality and B) PCa-specific mortality. ....                                                             | 89 |
| Supplementary Figure 52 Non-Linear association between waist-circumference and A) all-cause mortality and B) PCa-specific mortality. Estimated trend of the natural logarithm of HR according to the level of waist-circumference in each study..... | 90 |
| Risk of bias assessment.....                                                                                                                                                                                                                         | 90 |
| Supplementary Figure 53 Risk of bias assessment of studies included in meta-analyses. ....                                                                                                                                                           | 90 |
| APPENDIX 2: BMI and secondary outcomes (CVD-related mortality and non-PCa-specific mortality), descriptive overview .....                                                                                                                            | 91 |

| <b>Supplementary Table 1: PRISMA 2020 Checklist</b>  |        |                                                                                                                                                                                                                                                                                                      |                                 |
|-----------------------------------------------------------------------------------------------------------------------------------------|--------|------------------------------------------------------------------------------------------------------------------------------------------------------------------------------------------------------------------------------------------------------------------------------------------------------|---------------------------------|
| Section and Topic                                                                                                                       | Item # | Checklist item                                                                                                                                                                                                                                                                                       | Location where item is reported |
| <b>TITLE</b>                                                                                                                            |        |                                                                                                                                                                                                                                                                                                      |                                 |
| Title                                                                                                                                   | 1      | Identify the report as a systematic review.                                                                                                                                                                                                                                                          | Page 1                          |
| <b>ABSTRACT</b>                                                                                                                         |        |                                                                                                                                                                                                                                                                                                      |                                 |
| Abstract                                                                                                                                | 2      | See the PRISMA 2020 for Abstracts checklist.                                                                                                                                                                                                                                                         | Page 2                          |
| <b>INTRODUCTION</b>                                                                                                                     |        |                                                                                                                                                                                                                                                                                                      |                                 |
| Rationale                                                                                                                               | 3      | Describe the rationale for the review in the context of existing knowledge.                                                                                                                                                                                                                          | Page 4-5                        |
| Objectives                                                                                                                              | 4      | Provide an explicit statement of the objective(s) or question(s) the review addresses.                                                                                                                                                                                                               | Page 5                          |
| <b>METHODS</b>                                                                                                                          |        |                                                                                                                                                                                                                                                                                                      |                                 |
| Eligibility criteria                                                                                                                    | 5      | Specify the inclusion and exclusion criteria for the review and how studies were grouped for the syntheses.                                                                                                                                                                                          | Page 5                          |
| Information sources                                                                                                                     | 6      | Specify all databases, registers, websites, organisations, reference lists and other sources searched or consulted to identify studies. Specify the date when each source was last searched or consulted.                                                                                            | Page 5                          |
| Search strategy                                                                                                                         | 7      | Present the full search strategies for all databases, registers and websites, including any filters and limits used.                                                                                                                                                                                 | Supplementary material          |
| Selection process                                                                                                                       | 8      | Specify the methods used to decide whether a study met the inclusion criteria of the review, including how many reviewers screened each record and each report retrieved, whether they worked independently, and if applicable, details of automation tools used in the process.                     | Page 5                          |
| Data collection process                                                                                                                 | 9      | Specify the methods used to collect data from reports, including how many reviewers collected data from each report, whether they worked independently, any processes for obtaining or confirming data from study investigators, and if applicable, details of automation tools used in the process. | Pages 5-6                       |
| Data items                                                                                                                              | 10a    | List and define all outcomes for which data were sought. Specify whether all results that were compatible with each outcome domain in each study were sought (e.g. for all measures, time points, analyses), and if not, the methods used to decide which results to collect.                        | Page 5                          |
|                                                                                                                                         | 10b    | List and define all other variables for which data were sought (e.g. participant and intervention characteristics, funding sources). Describe any assumptions made about any missing or unclear information.                                                                                         | Pages 5-6                       |
| Study risk of bias assessment                                                                                                           | 11     | Specify the methods used to assess risk of bias in the included studies, including details of the tool(s) used, how many reviewers assessed each study and whether they worked independently, and if applicable, details of automation tools used in the process.                                    | Page 8-9                        |
| Effect measures                                                                                                                         | 12     | Specify for each outcome the effect measure(s) (e.g. risk ratio, mean difference) used in the synthesis or presentation of results.                                                                                                                                                                  | Page 6                          |
| Synthesis methods                                                                                                                       | 13a    | Describe the processes used to decide which studies were eligible for each synthesis (e.g. tabulating the study intervention characteristics and comparing against the planned groups for each synthesis (item #5)).                                                                                 | Pages 5-6                       |
|                                                                                                                                         | 13b    | Describe any methods required to prepare the data for presentation or synthesis, such as handling of missing summary statistics, or data conversions.                                                                                                                                                | Pages 5-6                       |

| <b>Supplementary Table 1: PRISMA 2020 Checklist</b> |               |                                                                                                                                                                                                                                                                                      |                                                                                                       |
|-----------------------------------------------------|---------------|--------------------------------------------------------------------------------------------------------------------------------------------------------------------------------------------------------------------------------------------------------------------------------------|-------------------------------------------------------------------------------------------------------|
| <b>Section and Topic</b>                            | <b>Item #</b> | <b>Checklist item</b>                                                                                                                                                                                                                                                                | <b>Location where item is reported</b>                                                                |
|                                                     | 13c           | Describe any methods used to tabulate or visually display results of individual studies and syntheses.                                                                                                                                                                               | Page 6-7                                                                                              |
|                                                     | 13d           | Describe any methods used to synthesize results and provide a rationale for the choice(s). If meta-analysis was performed, describe the model(s), method(s) to identify the presence and extent of statistical heterogeneity, and software package(s) used.                          | Page 6                                                                                                |
|                                                     | 13e           | Describe any methods used to explore possible causes of heterogeneity among study results (e.g. subgroup analysis, meta-regression).                                                                                                                                                 | Page 7-8                                                                                              |
|                                                     | 13f           | Describe any sensitivity analyses conducted to assess robustness of the synthesized results.                                                                                                                                                                                         | Page 8                                                                                                |
| Reporting bias assessment                           | 14            | Describe any methods used to assess risk of bias due to missing results in a synthesis (arising from reporting biases).                                                                                                                                                              | Pages 8-9 & 14                                                                                        |
| Certainty assessment                                | 15            | Describe any methods used to assess certainty (or confidence) in the body of evidence for an outcome.                                                                                                                                                                                | Page 6-7                                                                                              |
| <b>RESULTS</b>                                      |               |                                                                                                                                                                                                                                                                                      |                                                                                                       |
| Study selection                                     | 16a           | Describe the results of the search and selection process, from the number of records identified in the search to the number of studies included in the review, ideally using a flow diagram.                                                                                         | Pages 9-10 and Figure 1 (flow chart)                                                                  |
|                                                     | 16b           | Cite studies that might appear to meet the inclusion criteria, but which were excluded, and explain why they were excluded.                                                                                                                                                          | Page 9-10 & Supplementary tables 4A-D                                                                 |
| Study characteristics                               | 17            | Cite each included study and present its characteristics.                                                                                                                                                                                                                            | Supplementary Table 3                                                                                 |
| Risk of bias in studies                             | 18            | Present assessments of risk of bias for each included study.                                                                                                                                                                                                                         | Supplementary Figure 52                                                                               |
| Results of individual studies                       | 19            | For all outcomes, present, for each study: (a) summary statistics for each group (where appropriate) and (b) an effect estimate and its precision (e.g. confidence/credible interval), ideally using structured tables or plots.                                                     | Main Figures 3 & 4 Main Table 1 and subgroup analyses shown in forest plots in supplementary material |
| Results of syntheses                                | 20a           | For each synthesis, briefly summarise the characteristics and risk of bias among contributing studies.                                                                                                                                                                               | Supplementary Figure 52                                                                               |
|                                                     | 20b           | Present results of all statistical syntheses conducted. If meta-analysis was done, present for each the summary estimate and its precision (e.g. confidence/credible interval) and measures of statistical heterogeneity. If comparing groups, describe the direction of the effect. | Main Figures 3 & 4 Main Table 1 and subgroup analyses shown in forest plots in supplementary material |
|                                                     | 20c           | Present results of all investigations of possible causes of heterogeneity among study results.                                                                                                                                                                                       | All Figures/Results tables                                                                            |
|                                                     | 20d           | Present results of all sensitivity analyses conducted to assess the robustness of the synthesized results.                                                                                                                                                                           | Supplementary Figures (Forest plots) and Supplementary Tables 7-8                                     |
| Reporting biases                                    | 21            | Present assessments of risk of bias due to missing results (arising from reporting biases) for each synthesis assessed.                                                                                                                                                              | Supplementary Figure 52                                                                               |
| Certainty of evidence                               | 22            | Present assessments of certainty (or confidence) in the body of evidence for each outcome assessed.                                                                                                                                                                                  | Forest plots                                                                                          |
| <b>DISCUSSION</b>                                   |               |                                                                                                                                                                                                                                                                                      |                                                                                                       |
| Discussion                                          | 23a           | Provide a general interpretation of the results in the context of other evidence.                                                                                                                                                                                                    | Pages 14-15                                                                                           |

| Supplementary Table 1: PRISMA 2020 Checklist  |        |                                                                                                                                                                                                                                            |                                 |
|----------------------------------------------------------------------------------------------------------------------------------|--------|--------------------------------------------------------------------------------------------------------------------------------------------------------------------------------------------------------------------------------------------|---------------------------------|
| Section and Topic                                                                                                                | Item # | Checklist item                                                                                                                                                                                                                             | Location where item is reported |
|                                                                                                                                  | 23b    | Discuss any limitations of the evidence included in the review.                                                                                                                                                                            | Pages 17-18                     |
|                                                                                                                                  | 23c    | Discuss any limitations of the review processes used.                                                                                                                                                                                      | Pages 17-19                     |
|                                                                                                                                  | 23d    | Discuss implications of the results for practice, policy, and future research.                                                                                                                                                             | Pages 19-20                     |
| <b>OTHER INFORMATION</b>                                                                                                         |        |                                                                                                                                                                                                                                            |                                 |
| Registration and protocol                                                                                                        | 24a    | Provide registration information for the review, including register name and registration number, or state that the review was not registered.                                                                                             | Page 5                          |
|                                                                                                                                  | 24b    | Indicate where the review protocol can be accessed, or state that a protocol was not prepared.                                                                                                                                             | Page 5 (& link)                 |
|                                                                                                                                  | 24c    | Describe and explain any amendments to information provided at registration or in the protocol.                                                                                                                                            | -                               |
| Support                                                                                                                          | 25     | Describe sources of financial or non-financial support for the review, and the role of the funders or sponsors in the review.                                                                                                              | Page 26                         |
| Competing interests                                                                                                              | 26     | Declare any competing interests of review authors.                                                                                                                                                                                         | Page 26                         |
| Availability of data, code and other materials                                                                                   | 27     | Report which of the following are publicly available and where they can be found: template data collection forms; data extracted from included studies; data used for all analyses; analytic code; any other materials used in the review. | Page 26                         |

*From:* Page MJ, McKenzie JE, Bossuyt PM, Boutron I, Hoffmann TC, Mulrow CD, et al. The PRISMA 2020 statement: an updated guideline for reporting systematic reviews. *BMJ* 2021;372:n71. doi: 10.1136/bmj.n71

## **SUPPLEMENTARY TEXT**

### **Search strategies**

**Note:** Our search strategy also includes terms for physical activity and diet because it is part of a broader project, but the focus of this manuscript is anthropometry (terms indicated in bold) and mortality after PCa diagnosis.

### **PubMed search strategy**

#### **a. Search for mortality, survival, recurrence, and second cancer**

1. recurrence[MeSH Terms] OR "neoplasm recurrence, local"[MeSH Terms] OR "neoplasm metastasis"[MeSH Terms] OR "disease progression"[MeSH Terms] OR "disease-free survival"[MeSH Terms] OR prognosis[MeSH Terms] OR mortality[MeSH Terms] OR mortality[MeSH Subheading] OR survival[MeSH Terms] OR "survival analysis"[MeSH Terms] OR "neoplasms, second primary"[MeSH Terms]
2. recurrence[tiab] OR recurrences[tiab] OR relapse[tiab] OR relapses[tiab] OR remission[tiab] OR remissions[tiab] OR survivor[tiab] OR survivors[tiab] OR metasta\*[tiab] OR progression[tiab] OR survival[tiab] OR mortality[tiab] OR death[tiab] OR second cancer[tiab] OR "secondary cancer"[tiab]
3. #1 OR #2

#### **b. Search for prostate cancer**

4. Prostatic neoplasms[MeSH Terms]
5. prostat\*[tiab] AND cancer\*[tiab]



6. prostat\*[tiab] AND neoplasm\*[tiab]
7. prostat\*[tiab] AND carcinoma\*[tiab]
8. prostat\*[tiab] AND tumo\*[tiab]
9. #4 OR #5 OR #6 OR #7 OR #8

**c. Search for diet, body fatness and physical activity**

10. "diet therapy"[MeSH Terms] OR nutrition[MeSH Terms]
11. diet[tiab] OR diets[tiab] OR dietetic[tiab] OR dietary[tiab] OR eating[tiab] OR intake[tiab] OR nutrient\*[tiab] OR nutrition[tiab] OR vegetarian\*[tiab] OR vegan\*[tiab] OR "seventh day adventist"[tiab] OR macrobiotic[tiab]
12. "food and beverages"[MeSH Terms]
13. food\*[tiab] OR cereal\*[tiab] OR grain\*[tiab] OR granary[tiab] OR wholegrain[tiab] OR wholewheat[tiab] OR roots[tiab] OR plantain\*[tiab] OR tuber[tiab] OR tubers[tiab] OR vegetable\*[tiab] OR fruit\*[tiab] OR pulses[tiab] OR beans[tiab] OR lentils[tiab] OR chickpeas[tiab] OR legume\*[tiab] OR soy[tiab] OR soya[tiab] OR nut[tiab] OR nuts[tiab] OR peanut\*[tiab] OR groundnut\*[tiab] OR (seeds[tiab] AND (diet\*[tiab] OR food\*[tiab])) OR meat[tiab] OR beef[tiab] OR pork[tiab] OR lamb[tiab] OR poultry[tiab] OR chicken[tiab] OR turkey[tiab] OR duck[tiab] OR (fish[tiab] AND (diet\*[tiab] OR food\*[tiab])) OR ((fat[tiab] OR fats[tiab] OR fatty[tiab]) AND (diet\*[tiab] OR food\*[tiab] OR adipose[tiab] OR blood[tiab] OR serum[tiab] OR plasma[tiab])) OR egg[tiab] OR eggs[tiab] OR bread[tiab] OR (oils[tiab] AND (diet\*[tiab] OR food\*[tiab] OR adipose[tiab] OR blood[tiab] OR serum[tiab] OR plasma[tiab])) OR shellfish[tiab] OR seafood[tiab] OR sugar[tiab] OR syrup[tiab] OR dairy[tiab] OR milk[tiab] OR herbs[tiab] OR spices[tiab] OR chilli[tiab] OR chillis[tiab] OR pepper\*[tiab] OR condiments[tiab] OR tomato\*[tiab]
14. fluid intake[tiab] OR water[tiab] OR drinks[tiab] OR drinking[tiab] OR tea[tiab] OR coffee[tiab] OR caffeine[tiab] OR juice[tiab] OR beer[tiab] OR spirits[tiab] OR liquor[tiab] OR wine[tiab] OR alcohol[tiab] OR alcoholic[tiab] OR beverage\*[tiab] OR (ethanol[tiab] AND (drink\*[tiab] OR intake[tiab] OR consumption[tiab])) OR yerba mate[tiab] OR ilex paraguariensis[tiab]
15. pesticides[MeSH Terms] OR fertilizers[MeSH Terms] OR "veterinary drugs"[MeSH Terms]
16. pesticide\*[tiab] OR herbicide\*[tiab] OR DDT[tiab] OR fertiliser\*[tiab] OR fertilizer\*[tiab] OR organic[tiab] OR contaminants[tiab] OR contaminate\*[tiab] OR veterinary drug\*[tiab] OR polychlorinated dibenzofuran\*[tiab] OR PCDF\*[tiab] OR polychlorinated dibenzodioxin\*[tiab] OR PCDD\*[tiab] OR polychlorinated biphenyl\*[tiab] OR PCB[tiab] OR cadmium[tiab] OR arsenic[tiab] OR chlorinated hydrocarbon\*[tiab] OR microbial contamination\*[tiab]
17. "food preservation"[MeSH Terms]
18. (mycotoxin\*[tiab] OR aflatoxin\*[tiab] OR pickled[tiab] OR bottled[tiab] OR bottling[tiab] OR canned[tiab] OR canning[tiab] OR vacuum pack\*[tiab] OR refrigerate\*[tiab] OR refrigeration[tiab] OR cured[tiab] OR smoked[tiab] OR preserved[tiab] OR preservatives[tiab] OR nitrosamine[tiab] OR hydrogenation[tiab] OR fortified[tiab] OR additive\*[tiab] OR colouring\*[tiab] OR coloring\*[tiab] OR flavouring\*[tiab] OR flavoring\*[tiab] OR nitrates[tiab] OR nitrites[tiab] OR solvent[tiab] OR solvents[tiab] OR ferment\*[tiab] OR processed[tiab] OR antioxidant\*[tiab] OR genetic modif\*[tiab] OR genetically modif\*[tiab] OR vinyl chloride[tiab] OR packaging[tiab] OR labelling[tiab] OR phthalates[tiab]) AND (diet\*[tiab] OR food\*[tiab] OR adipose[tiab] OR blood[tiab] OR serum[tiab] OR plasma[tiab])
19. cookery[MeSH Terms]
20. cooking[tiab] OR cooked[tiab] OR grill[tiab] OR grilled[tiab] OR fried[tiab] OR fry[tiab] OR roast[tiab] OR bake[tiab] OR baked[tiab] OR stewing[tiab] OR stewed[tiab] OR casserol\*[tiab] OR broil[tiab] OR broiled[tiab] OR boiled[tiab] OR ((microwave[tiab] OR microwaved[tiab] OR re-heating[tiab] OR reheating[tiab] OR heating[tiab] OR re-heated[tiab] OR heated[tiab]) AND (diet\*[tiab] OR food\*[tiab])) OR poach[tiab] OR poached[tiab] OR steamed[tiab] OR barbecue\*[tiab] OR chargrill\*[tiab] OR heterocyclic amines[tiab] OR polycyclic aromatic hydrocarbons[tiab]
21. ((carbohydrates[MeSH Terms] OR proteins[MeSH Terms]) AND (diet\*[tiab] OR food\*[tiab])) OR "sweetening agents"[MeSH Terms]
22. (salt[tiab] OR salting[tiab] OR salted[tiab] OR fiber[tiab] OR fibre[tiab] OR polysaccharide\*[tiab] OR starch[tiab] OR starchy[tiab] OR carbohydrate\*[tiab] OR lipid\*[tiab] OR linoleic acid\*[tiab] OR sterols[tiab] OR stanols[tiab] OR sugar\*[tiab] OR sweetener\*[tiab] OR saccharin\*[tiab] OR aspartame[tiab] OR acesulfame[tiab] OR cyclamates[tiab] OR maltose[tiab] OR mannitol[tiab] OR sorbitol[tiab] OR sucrose[tiab] OR xylitol[tiab] OR cholesterol[tiab] OR protein[tiab] OR proteins[tiab] OR hydrogenated dietary oils[tiab] OR hydrogenated lard[tiab] OR hydrogenated oils[tiab]) AND (diet\*[tiab] OR food\*[tiab] OR adipose[tiab] OR blood[tiab] OR serum[tiab] OR plasma[tiab])

23. vitamins[MeSH Terms]
24. supplements[tiab] OR supplement[tiab] OR vitamin\*[tiab] OR retinol[tiab] OR carotenoid\*[tiab] OR tocopherol[tiab] OR folate\*[tiab] OR folic acid[tiab] OR methionine[tiab] OR riboflavin[tiab] OR thiamine[tiab] OR niacin[tiab] OR pyridoxine[tiab] OR cobalamin[tiab] OR mineral\*[tiab] OR (sodium[tiab] AND (diet\*[tiab] OR food\*[tiab])) OR iron[tiab] OR (calcium[tiab] AND (diet\*[tiab] OR food\*[tiab] OR supplement\*[tiab])) OR selenium[tiab] OR (iodine[tiab] AND (diet\*[tiab] OR food\*[tiab] OR supplement\*[tiab] OR deficiency)) OR magnesium[tiab] OR potassium[tiab] OR zinc[tiab] OR copper[tiab] OR phosphorus[tiab] OR manganese[tiab] OR chromium[tiab] OR phytochemical[tiab] OR allium[tiab] OR isothiocyanate\*[tiab] OR glucosinolate\*[tiab] OR indoles[tiab] OR polyphenol\*[tiab] OR phytestrogen\*[tiab] OR genistein[tiab] OR saponin\*[tiab] OR coumarin\*[tiab] OR lycopene[tiab] OR “infant formula”[MeSH Terms] OR infant formula[tiab]
25. “physical fitness”[MeSH Terms] OR “physical exertion”[MeSH Terms] OR “physical endurance”[MeSH Terms] OR walking[MeSH Terms] OR exercise[MeSH Terms] OR “muscle stretching exercises”[MeSH Terms] OR “tai ji”[MeSH Terms] OR yoga[MeSH Terms] OR “sedentary behavior”[MeSH Terms]
26. recreational activit\*[tiab] OR household activit\*[tiab] OR occupational activit\*[tiab] OR physical activit\*[tiab] OR physical inactivit\*[tiab] OR exercise[tiab] OR exercising[tiab] OR energy intake[tiab] OR energy expenditure[tiab] OR energy restriction[tiab] OR famine[MeSH Terms] OR famine[tiab] OR energy balance[tiab] OR energy density[tiab] OR sedentar\*[tiab] OR standing[tiab] OR sitting[tiab] OR television[tiab] OR “screen time”[MeSH Terms] OR screen[tiab] OR aerobic activities[tiab] OR aerobic activity[tiab] OR cardiovascular activities[tiab] OR cardiovascular activity[tiab] OR endurance activities[tiab] OR endurance activity[tiab] OR resistance training[tiab] OR strength training[tiab] OR physical conditioning[tiab] OR functional training[tiab] OR leisure-time physical activity[tiab] OR lifestyle activities[tiab] OR lifestyle activity[tiab] OR qi gong[tiab] OR tai chi[tiab] OR tai ji[tiab] OR yoga[tiab] OR free living activities[tiab] OR free living activity[tiab] OR walk[tiab] OR walking[tiab]
27. “body weight”[MeSH Terms] OR anthropometry[MeSH Terms] OR “body composition”[MeSH Terms] OR “body constitution”[MeSH Terms] OR “body size”[MeSH Terms] OR body size[tiab]
28. weight loss[tiab] OR weight gain[tiab] OR anthropometry[tiab] OR birth weight[tiab] OR birthweight[tiab] OR birth-weight[tiab] OR child development[tiab] OR height[tiab] OR body composition[tiab] OR body mass index[tiab] OR BMI[tiab] OR obesity[tiab] OR obese[tiab] OR overweight[tiab] OR over-weight[tiab] OR overweight[tiab] OR skinfold measurement\*[tiab] OR skinfold thickness[tiab] OR DEXA[tiab] OR bio-impedence[tiab] OR waist circumference[tiab] OR hip circumference[tiab] OR waist hip ratio\*[tiab]
29. #10 OR #11 OR #12 OR #13 OR #14 OR #15 OR #16 OR #17 OR #18 OR #19 OR #20 OR #21 OR #22 OR #23 OR #24 OR #25 OR #26 OR #27 OR #28
- d. Limit to human studies**
30. animal[MeSH Terms] NOT human[MeSH Terms]
31. #29 NOT #30
- e. Combine the searches**
32. #3 AND #9 AND #31

#### EMBASE search strategy

##### a. Search for mortality, survival, recurrence, second cancer.

1. \*Recurrent disease/
2. \*Disease exacerbation/
3. Disease free survival/
4. mortality/ or all cause mortality/ or cancer mortality/ or cardiovascular mortality/ or mortality rate/ or premature mortality/
5. Survival analysis/
6. Relapse/
7. Survivor/
8. Second cancer/

9. (recur\$ or local recurrence or progression or relap\$ or prognos\$ or surviv\$ or mortality or death or (second\$ adj5 primar\$)).ab,ti.
10. 1 or 2 or 3 or 4 or 5 or 6 or 7 or 8 or 9
- b. Search for studies specifically on prostate cancer**
11. prostate cancer/
12. (prostate and (cancer\$ or neoplasm\$ or tumour\$ or tumor\$ or carcinoma\$ or adenocarcinoma\$)).tw,kw.
13. 11 or 12
- c. Search for all studies relating to diet, body fatness and physical activity**
14. Diet therapy/
15. Nutrition/
16. (diet or diets or dietetic\$ or dietary or eating or intake or nutrient\$ or nutrition or vegetarian\$ or vegan\$ or (seventh adj1 day adj1 adventist) or macrobiotic).ab,ti.
17. 14 or 15 or 16
18. Food/
19. (food\$ or cereal\$ or grain\$ or granary or wholegrain or wholewheat or roots or plantain\$ or tuber or tubers or vegetable\$ or fruit\$ or pulses or beans or lentils or chickpeas or legume\$ or soy or soya or nut or nuts or peanut\$ or groundnut\$ or (seeds and (diet\$ or food\$))).ab,ti.
20. (meat or beef or pork or lamb or poultry or chicken or turkey or duck or (fish and (diet\$ or food\$)) or ((fat or fats or fatty) and (diet\$ or food\$ or adipose or blood or serum or plasma)) or egg or eggs or bread or (oils and (diet\$ or food\$ or adipose or blood or serum or plasma)) or shellfish or seafood or sugar or syrup or dairy or milk or herbs or spices or chilli or chillis or pepper\$ or condiments or tomato\$).ab,ti.
21. 18 or 19 or 20
22. Beverage/
23. (fluid intake or water or drinks or drinking or tea or coffee or caffeine or juice or beer or spirits or liquor or wine or alcohol or alcoholic or beverage\$ or (ethanol and (drink\$ or intake or consumption)) or yerba mate or ilex or paraguariensis).ab,ti.
24. 22 or 23
25. \*Pesticide/
26. \*Fertilizer/
27. \*Veterinary drug/
28. (pesticide\$ or herbicide\$ or DDT or fertiliser\$ or fertilizer\$ or organic or contaminants or contaminate\$ or veterinary drug\$ or polychlorinated dibenzofuran\$ or PCDF\$ or polychlorinated dibenzodioxin\$ or PCDD\$ or polychlorinated biphenyl\$ or PCB\$ or cadmium or arsenic or chlorinated hydrocarbon\$ or microbial contamination\$).ab,ti.
29. 25 or 26 or 27 or 28
30. Food Preservation/
31. ((mycotoxin\$ or aflatoxin\$ or pickled or bottled or bottling or canned or canning or vacuum pack\$ or refrigerate\$ or refrigeration or cured or smoked or preserved or preservatives or nitrosamine or hydrogenation or fortified or additive\$ or colouring\$ or coloring\$ or flavouring\$ or flavoring\$ or nitrates or nitrites or solvent or solvents or ferment\$ or processed or antioxidant\$ or genetic modif\$ or genetically modif\$ or vinyl chloride or packaging or labelling or phthalates) and (diet\$ or food\$ or adipose or blood or serum or plasma)).ab,ti.
32. 30 or 31
33. Cooking/
34. (cooking or cooked or grill or grilled or fried or fry or roast or bake or baked or stewing or stewed or casserol\$ or broil or broiled or boiled or ((microwave or microwaved or re-heating or reheating or heating or re-heated or heated) and (diet\$ or food\$)) or poach or poached or steamed or barbecue\$ or chargrill\$ or heterocyclic amines or polycyclic aromatic hydrocarbons).ab,ti.
35. 33 or 34
36. Carbohydrate/ and (diet\$ or food\$).ab,ti.
37. Protein/ and (diet\$ or food\$).ab,ti.
38. Sweetening agent/
39. ((salt or salting or salted or fiber or fibre or polysaccharide\$ or starch or starchy or carbohydrate\$ or lipid\$ or linoleic acid\$ or sterols or stanols or sugar\$ or sweetener\$ or saccharin\$ or aspartame or acesulfame or cyclamates or maltose or mannitol or sorbitol or sucrose or xylitol or cholesterol or hydrogenated dietary oils or hydrogenated lard or hydrogenated oils or protein\$) and (diet\$ or food\$ or adipose or blood or serum or plasma)).ab,ti.
40. 36 or 37 or 38 or 39

41. Vitamins/
42. Vitamin D/ or (supplements or supplement or vitamin\$ or retinol or carotenoid\$ or tocopherol or folate\$ or folic acid or methionine or riboflavin or thiamine or niacin or pyridoxine or cobalamin or mineral\$ or (sodium and (diet\$ or food\$)) or iron or (calcium and (diet\$ or food\$ or supplement\$)) or selenium or (iodine and (diet\$ or food\$ or supplement\$ or deficiency)) or magnesium or potassium or zinc or copper or phosphorus or manganese or chromium or phytochemical or allium or isothiocyanate\$ or glucosinolate\$ or indoles or polyphenol\$ or phytoestrogen\$ or genistein or saponin\$ or coumarin\$ or lycopene).ab,ti.
43. 41 or 42
44. \*Fitness/
45. Exercise/
46. \*Endurance/
47. Walking/
48. Stretching exercise/
49. Tai Chi/
50. Qigong/
51. Yoga/
52. Sedentary lifestyle/
53. (physical fitness or physical exertion or physical endurance or muscle stretching exercise\$ or recreational activit\$ or household activit\$ or occupational activit\$ or physical activit\$ or physical inactivit\$ or exercise\$ or exercising or energy intake or energy expenditure or energy balance or energy density or sedentar\$ or standing or sitting or television viewing or aerobic activit\$ or cardiovascular activit\$ or endurance activit\$ or resistance training or strength training or physical conditioning or functional training or leisure time physical activit\$ or lifestyle activit\$ or qigong or tai chi or tai ji or yoga or free living activit\$ or walk or walking).ab,ti.
54. 44 or 45 or 46 or 47 or 48 or 49 or 50 or 51 or 52 or 53
55. Body weight/
56. Anthropometry/
57. Body Composition/
58. Body Constitution/
59. Body size/
60. (weight or weight loss or weight gain or anthropometry or birth weight or birthweight or birth weight or child development or height or body composition or fat distribution or body mass or BMI or obesity or obese or overweight or overweight or skinfold measurement\$ or skinfold thickness or DEXA or bio-impedence or waist circumference or hip circumference or waist hip ratio\$ or body size).ab,ti.
61. 55 or 56 or 57 or 58 or 59 or 60
62. 17 or 21 or 24 or 29 or 32 or 35 or 40 or 43 or 54 or 61
63. exp animal/
64. exp human/
65. 63 not 64
66. 62 not 65
- d. Combine the above**
67. 10 and 13 and 66

## APPENDIX 1: BMI and waist circumference and primary outcomes (all-cause mortality and prostate cancer (PCa)-specific mortality)

### SUPPLEMENTARY TABLES

| <b>Supplementary Table 2 Commonly reported mean or median BMI values for the specific category range from relevant literature</b> |                                                                    |                                                                                                                                             |
|-----------------------------------------------------------------------------------------------------------------------------------|--------------------------------------------------------------------|---------------------------------------------------------------------------------------------------------------------------------------------|
| Low or upper open-ended category of BMI                                                                                           | What did we use as midpoint in the non-linear sensitivity analyses | References                                                                                                                                  |
| <25                                                                                                                               | 23                                                                 | Zhu 2015, <sup>1</sup> Parekh 2010, <sup>2</sup> Perez-Cornago 2017, <sup>3</sup> van Roermund 2010, <sup>4</sup> Recalde 2021 <sup>5</sup> |
| <30                                                                                                                               | 27                                                                 | Kelkar 2021, <sup>6</sup> Merrick 2007 <sup>7</sup>                                                                                         |
| >30                                                                                                                               | 33                                                                 | Parekh 2010, <sup>2</sup> Vidal 2018, <sup>8</sup> Jackson 2020, <sup>9</sup> Recalde 2021, <sup>5</sup> Keto 2012 <sup>10</sup>            |
| >35                                                                                                                               | 39                                                                 | Parekh 2010, <sup>2</sup> Kaplan 2020 <sup>11</sup>                                                                                         |

### References

1. Zhu Y, Han CT, Zhang GM, *et al.* Effect of body mass index on the performance characteristics of PSA-related markers to detect prostate cancer. *Sci Rep* 2016;6:19034.
2. Parekh N, Lin Y, Dipaola RS, *et al.* Obesity and prostate cancer detection: insights from three national surveys. *Am J Med* 2010;123(9):829-35.
3. Perez-Cornago A, Appleby PN, Pischon T, *et al.* Tall height and obesity are associated with an increased risk of aggressive prostate cancer: results from the EPIC cohort study. *BMC Med* 2017;15(1):115.
4. van Roermund JG, Hinnen KA, Battermann JJ, *et al.* Body mass index is not a prognostic marker for prostate-specific antigen failure and survival in Dutch men treated with brachytherapy. *BJU Int* 2010;105(1):42-8.
5. Recalde M, Davila-Batista V, Díaz Y, *et al.* Body mass index and waist circumference in relation to the risk of 26 types of cancer: a prospective cohort study of 3.5 million adults in Spain. *BMC Med* 2021;19(1):10.
6. Kelkar S, Oyekunle T, Eisenberg A, *et al.* Diabetes and Prostate Cancer Outcomes in Obese and Nonobese Men After Radical Prostatectomy. *JNCI Cancer Spectr* 2021;5(3):pkab023.
7. Merrick GS, Galbreath RW, Butler WM, *et al.* Obesity is not predictive of overall survival following permanent prostate brachytherapy. *Am J Clin Oncol* 2007;30(6):588-96.
8. Vidal AC, Howard LE, de Hoedt A, *et al.* Obese patients with castration-resistant prostate cancer may be at a lower risk of all-cause mortality: results from the Shared Equal Access Regional Cancer Hospital (SEARCH) database. *BJU Int* 2018;122(1):76-82.
9. Jackson MD, Tulloch-Reid MK, McCaw-Binns AM, *et al.* Central adiposity at diagnosis may reduce prostate cancer-specific mortality in African-Caribbean men with prostate cancer: 10-year follow-up of participants in a case-control study. *Cancer Causes Control* 2020;31(7):651-62.
10. Keto CJ, Aronson WJ, Terris MK, *et al.* Obesity is associated with castration-resistant disease and metastasis in men treated with androgen deprivation therapy after radical prostatectomy: results from the SEARCH database. *BJU Int* 2012;110(4):492-8.
11. Kaplan RM, Tanaka Y, Passman RS, *et al.* Efficacy and Safety of Direct Oral Anticoagulants for Atrial Fibrillation Across Body Mass Index Categories. *J Am Heart Assoc* 2020;9(24):e017383.

| <b>Supplementary Table 3 Main characteristics of studies with post diagnosis data on BMI included in any analysis of all-cause or PCa-specific mortality</b> |                                                                                                                                                                                                                                                                                                           |                                                                                                                         |                                                                                     |                                                                                                                                |                                                 |                                                                                                                                                                                                                                                                                                                                                                                                                                                                                                                                                                            |
|--------------------------------------------------------------------------------------------------------------------------------------------------------------|-----------------------------------------------------------------------------------------------------------------------------------------------------------------------------------------------------------------------------------------------------------------------------------------------------------|-------------------------------------------------------------------------------------------------------------------------|-------------------------------------------------------------------------------------|--------------------------------------------------------------------------------------------------------------------------------|-------------------------------------------------|----------------------------------------------------------------------------------------------------------------------------------------------------------------------------------------------------------------------------------------------------------------------------------------------------------------------------------------------------------------------------------------------------------------------------------------------------------------------------------------------------------------------------------------------------------------------------|
| First author<br>Year,<br>Country                                                                                                                             | Study design, characteristics,<br>and any important exclusions<br>at baseline                                                                                                                                                                                                                             | Cancer characteristics<br><br>Treatments                                                                                | Exclusion of<br>early follow-up<br>deaths                                           | Assessment of weight and height<br><br>Death confirmation                                                                      | N events,<br>(Total men)                        | Type analysis<br><br>Covariates                                                                                                                                                                                                                                                                                                                                                                                                                                                                                                                                            |
| Verma 2022, <sup>1</sup><br>Multinational                                                                                                                    | <u>Retrospective cohort</u><br>Data from the ENTHUSE<br>MIC(Fizazi et al 2013)<br><br><u>Exclusions:</u><br>Underweight men with<br>BMI<18.5 kg/m <sup>2</sup> (n=3)                                                                                                                                      | Advanced PCa: mCRPC<br><br><u>Treatments:</u><br>Docetaxel-based chemotherapy                                           | No                                                                                  | Height and weight measurements at the<br>time of enrolment in the study.                                                       | ACM:<br>451, (466)                              | <i>Cox proportional hazards regression<br/>models</i><br><br><u>Adjusted for:</u><br>Age at diagnosis, World Health<br>Organization performance status, PSA,<br>visceral metastasis, bone metastasis                                                                                                                                                                                                                                                                                                                                                                       |
| Martini 2021, <sup>2</sup><br>Multinational                                                                                                                  | <u>Retrospective cohort</u><br><br>Data from the control arms of<br>three phase III randomized<br>control trials (RCTs), namely<br>ASCENT2<br>—NCT00273338(Scher<br>2011), VENICE—<br>NCT00519285 (Tannock<br>2013), and MAINSAIL—<br>NCT00988208(Petrylak<br>2015), obtained from Project<br>Data Sphere | Advanced PCa: mCRPC<br><br><u>Treatments:</u><br>Docetaxel and prednisone (also some<br>radiotherapy and prostatectomy) | No                                                                                  | BMI was assessed at the time of<br>randomization                                                                               | ACM:<br>655, (1577)<br><br>PCSM: 451,<br>(1104) | <i>Cox proportional hazards regression<br/>models for ACM (VENICE, ASCENT2<br/>and MAINSAIL trials) and Fine and<br/>Gray's regression model for PCSM<br/>(VENICE and MAINSAIL trials)</i><br><br><u>Adjusted for:</u><br>Age at randomization, PSA, diabetes<br>(absent vs. present), ECOG<br>performance status (0 vs. 1 vs. 2),<br>number of metastases (continuous), and<br>prior treatment (radiotherapy or<br>prostatectomy vs. no prior treatment),<br>treatment dose, which was estimated<br>according to each patient's body-<br>surface area in m <sup>2</sup> . |
| Jackson 2020, <sup>3</sup><br>Jamaica                                                                                                                        | <u>Retrospective cohort</u><br><br>Follow-up of cases from a<br>case-control study                                                                                                                                                                                                                        | Non-metastatic.<br>High and low grade PCa.<br>Gleason score: 104 men=2-6, 82 men=7, 49<br>men=8-10 (some missing).      | Yes, secondary<br>analyses that<br>excluded deaths<br>occurring<br>during the first | Weight and height measured to nearest<br>0.1kg and 0.1cm at study entry (at<br>diagnosis). Measurements taken in<br>duplicate. | ACM:<br>138, (239)                              | <i>Cox proportional hazards regression<br/>models</i><br><br><u>Adjusted for:</u>                                                                                                                                                                                                                                                                                                                                                                                                                                                                                          |

|                                                 |                                                                                                                                                                                                                                                                                                                                                                                                                                                   |                                                                                                                                                 |                                     |                                                                                                                                                                                                                                                         |                |                                                                                                                                                                                                       |
|-------------------------------------------------|---------------------------------------------------------------------------------------------------------------------------------------------------------------------------------------------------------------------------------------------------------------------------------------------------------------------------------------------------------------------------------------------------------------------------------------------------|-------------------------------------------------------------------------------------------------------------------------------------------------|-------------------------------------|---------------------------------------------------------------------------------------------------------------------------------------------------------------------------------------------------------------------------------------------------------|----------------|-------------------------------------------------------------------------------------------------------------------------------------------------------------------------------------------------------|
|                                                 | <p>Age range: 40 to 80 years (median: 69 years), men attending urology clinics. 56% diabetics, 92% hypertension, 39% PCa family history</p> <p><u>Exclusions:</u><br/>-Men with advanced metastatic cancer and/or severe weight loss previous prostate surgery or those on 5-alpha reductase inhibitors, prior or current hormone therapy<br/>-Underweight men with BMI &lt; 18.5 kg/m<sup>2</sup></p> <p><u>Follow-up:</u> 11.3 median years</p> | <p><u>Treatments:</u><br/>Radiation therapy, EBRT or ADT 30.1% radiation with ADT, 12.9% orchiectomy, 53% ADT only.</p>                         | 2 years of follow-up post-enrolment | <p><u>Death confirmation:</u> Death certificates or medical records confirmed by End Points Committee which included physicians, a nurse, urologists, and an expert Nosologist. Also, the mortality database of the Registrar General's Department.</p> | PCSM: 55 (239) | Age at diagnosis, height, smoking status, diabetes, family history, Gleason score, treatment modalities, ADT                                                                                          |
| Xu 2020, <sup>4</sup><br>USA (Southeast region) | <p><u>Retrospective cohort</u></p> <p>Age range: 50 to 97 years (median: 71.5 years), Men who presented to the Vanderbilt University Medical Center Comprehensive Prostate Cancer Clinic</p> <p><u>Exclusions:</u><br/>-Patients without CT imaging data and who were not treated by a urologist</p> <p><u>Follow-up:</u> 33.9 median months</p>                                                                                                  | <p>Advanced PCa: 47.8% mCRPC, 30.2% mHSPC and 22% nmCRPC</p> <p><u>Treatments:</u> Not stated</p>                                               | No                                  | <p>Demographic, pathological and survival information were obtained via electronic medical record review.</p> <p><u>Death confirmation:</u> Follow-up and medical records</p>                                                                           | ACM: 95 (182)  | <p><i>Cox proportional hazards regression models</i></p> <p><u>Adjusted for:</u><br/>Skeletal muscle index, skeletal muscle density, age, Charlson comorbidity index, race, clinical cancer stage</p> |
| Kashiwagi 2020, <sup>5</sup><br>Japan           | <p><u>Retrospective cohort</u></p> <p><u>Age median (range):</u> 72 (46-91)</p> <p><u>Follow-up:</u> 32 median months</p>                                                                                                                                                                                                                                                                                                                         | <p>Hormone-naïve Metastatic PCa<br/>ct stage: T1c to T4<br/>cN stage: N0-N1<br/>cM stage: M0, most M1</p> <p><u>Treatments:</u> primary ADT</p> | No                                  | BMI calculated for each patient based on weight and height values recorded before therapy                                                                                                                                                               | ACM: 60 (178)  | <p><i>Cox proportional hazards regression models</i></p> <p><u>Adjusted for:</u><br/>Age, Gleason score, PSA at diagnosis, cT stage and cM stage.</p>                                                 |



|                                                    |                                                                                                                                                                                                                                                                                                                                                                                                                                                                                                                                                                             |                                                                                                                                                                                                                                                                                                    |                                                                                                                                                                                                                                                |                                                                                                                                                                                                              |                                                                         |                                                                                                                                                                                                                                                                                  |
|----------------------------------------------------|-----------------------------------------------------------------------------------------------------------------------------------------------------------------------------------------------------------------------------------------------------------------------------------------------------------------------------------------------------------------------------------------------------------------------------------------------------------------------------------------------------------------------------------------------------------------------------|----------------------------------------------------------------------------------------------------------------------------------------------------------------------------------------------------------------------------------------------------------------------------------------------------|------------------------------------------------------------------------------------------------------------------------------------------------------------------------------------------------------------------------------------------------|--------------------------------------------------------------------------------------------------------------------------------------------------------------------------------------------------------------|-------------------------------------------------------------------------|----------------------------------------------------------------------------------------------------------------------------------------------------------------------------------------------------------------------------------------------------------------------------------|
| Troeschel 2020, <sup>6</sup><br>USA<br>(21 states) | <p><u>Prospective cohort</u></p> <p>Follow-up of cases from a “non-cancer” cohort i.e., men from CPS II Nutrition Cohort, Age mean (SD): 70.9 (5.72), 25.3% family history</p> <p><u>Exclusions</u></p> <ul style="list-style-type: none"> <li>-No survey completed one to less than 6 years after diagnosis.</li> <li>-Follow-up ends less than four years from postdiagnosis survey.</li> <li>-Implausible first postdiagnosis BMI.</li> <li>-Underweight men i.e. First postdiagnosis BMI &lt;18.5 kg/m<sup>2</sup></li> </ul> <p><u>Follow-up:</u> 7.3 median years</p> | <p>Non-metastatic PCa (Mainly localised)<br/>Gleason score: 53% 2-6, 24.8% 7, 10.5% 8-10, 8.5% low Gleason score (5-7) and 0.9% high Gleason score (7-10), 2.2% missing</p> <p><u>Treatments:</u> 36.3% surgery, 36.5% radiation, 4% hormone only, 6.5% watchful waiting, 16.7% missing</p>        | <p>Yes, in primary analyses excluded person-time/deaths within 4-years of completing the post-diagnosis surveys.</p> <p><u>Sensitivity analysis:</u> excluding men with follow-up ending within 2-years of the first post-diagnosis survey</p> | <p>Postdiagnosis BMI obtained from self-reported weight on the first survey completed one to less than six years after diagnosis</p> <p><u>Death confirmation:</u><br/>Linkage with National Death Index</p> | <p>ACM:<br/>3855<br/>(8,330)</p> <hr/> <p>PCSM:<br/>603<br/>(8,330)</p> | <p><i>Cox proportional hazards regression models</i></p> <p><u>Adjusted for:</u><br/>Age, initial treatment, tumour local extent, Gleason score, smoking status, post-diagnosis physical activity, education, year of diagnosis (pre-diagnosis BMI in supplemental analyses)</p> |
| Stangl-Kremser 2020, <sup>7</sup><br>Austria       | <p><u>Retrospective cohort</u></p> <p>Age median (IQR) 68.8 (64.6–75.0)</p> <p><u>Exclusions:</u></p> <ul style="list-style-type: none"> <li>-Insufficient imaging</li> <li>-Lost to follow-up</li> </ul> <p><u>Follow-up:</u> 24.1 median months</p>                                                                                                                                                                                                                                                                                                                       | <p>Advanced CRPC<br/>Metastatic site:<br/>9.9% liver, 11% visceral (other than liver) 39.8% distant lymph nodes 82.5% bone</p> <p><u>Treatments:</u><br/>Docetaxel with prednisolone<br/>ADT before docetaxel initiation (authors unable to determine the precise duration prior to docetaxel)</p> | <p>No</p>                                                                                                                                                                                                                                      | <p>BMI at chemotherapy initiation retrieved from the institutional electronic medical records database.</p> <p><u>Death confirmation:</u><br/>Medical records</p>                                            | <p>ACM:<br/>93 (186)</p>                                                | <p><i>Cox proportional hazards regression models</i></p> <p><i>*Tested some other potential confounders in univariate analysis.</i></p> <p><u>Adjusted for:</u><br/>Liver metastases, high visceral-to-subcutaneous fat area ratio</p>                                           |

|                                                   |                                                                                                                                                                               |                                                                                                                  |    |                                                                                                                                         |                                            |                                                                                                                                                                                                                                                                                                                              |
|---------------------------------------------------|-------------------------------------------------------------------------------------------------------------------------------------------------------------------------------|------------------------------------------------------------------------------------------------------------------|----|-----------------------------------------------------------------------------------------------------------------------------------------|--------------------------------------------|------------------------------------------------------------------------------------------------------------------------------------------------------------------------------------------------------------------------------------------------------------------------------------------------------------------------------|
| Ikeda 2020, <sup>8</sup><br>Japan (East-Asia)     | <u>Retrospective cohort</u><br><br>Age median IQR: 73 (66-78)<br><br>Follow-up: 39 median months                                                                              | mHSPC<br><br>No patients received any previous treatments for the disease                                        | No | BMI at baseline (not clear information provided about source)<br><br><u>Death confirmation:</u><br>No information provided              | ACM: 80 (197)                              | <i>Cox proportional hazards regression models</i><br><i>*Variables with a p-value &lt;0.05 identified by univariate analysis were included in the multivariate analysis</i><br><br><u>Adjusted for:</u> Sarcopenia, serum, Gleason score, latitude risk classification (high vs low risk), serum lactate dehydrogenase level |
| Abdel-Rahman 2019, <sup>9</sup><br>Multinational  | <u>Retrospective cohort</u><br><br>Pooled analysis of the comparator arms of 3 clinical trials (NCT00988208; NCT00273338; NCT00519285)<br><br><u>Follow-up:</u> 453 mean days | Chemotherapy-naive patients with CRPC<br>Stages: M1a, M1b and M1c<br><br><u>Treatments:</u> Docetaxel/prednisone | No | BMI collected at baseline<br><br><u>Death confirmation:</u><br>No information provided                                                  | ACM:<br>NA (1600)                          | <i>Cox proportional hazards regression models</i><br><br><u>Adjusted for:</u> baseline haemoglobin, baseline albumin, baseline BMI, age at diagnosis, duration of exposure to docetaxel, M stage, class of patients (nondiabetic, diabetic metformin, or diabetic no metformin), and baseline PSA.                           |
| Darcey 2019, <sup>10</sup><br>Australia (western) | <u>Retrospective cohort</u><br><br>Follow-up of cases from a case-control study<br>Age range: 40 to 75 years (median: 63 years)<br><br><u>Follow-up:</u> 15 median years      | Mixed: Gleason score <7 and >7<br><br><u>Treatments:</u><br>Lack of information about treatment/s                | No | Self-reported height and weight at/ around the time of diagnosis<br><br><u>Death confirmation:</u><br>Local cancer and death registries | ACM:<br>193 (572)<br><br>PCSM:<br>76 (572) | <i>Cox proportional hazards regression models</i><br><br><u>Adjusted for:</u><br>Age at diagnosis, recent physical activity, smoking status, and stratified by Gleason score (<7 vs 7 vs >7).                                                                                                                                |

|                                      |                                                                                                                                                                                                       |                                                                                                                                                                                                                                                                    |                                                                                        |                                                                                                                                                                                                                                                                                                                                                                                                                                                                                                                                                                                                                              |                                                                                   |                                                                                                                                                                                                                                                                                                                                                                                                                                                                                                                                                                                                                                                                                                                                                                                          |
|--------------------------------------|-------------------------------------------------------------------------------------------------------------------------------------------------------------------------------------------------------|--------------------------------------------------------------------------------------------------------------------------------------------------------------------------------------------------------------------------------------------------------------------|----------------------------------------------------------------------------------------|------------------------------------------------------------------------------------------------------------------------------------------------------------------------------------------------------------------------------------------------------------------------------------------------------------------------------------------------------------------------------------------------------------------------------------------------------------------------------------------------------------------------------------------------------------------------------------------------------------------------------|-----------------------------------------------------------------------------------|------------------------------------------------------------------------------------------------------------------------------------------------------------------------------------------------------------------------------------------------------------------------------------------------------------------------------------------------------------------------------------------------------------------------------------------------------------------------------------------------------------------------------------------------------------------------------------------------------------------------------------------------------------------------------------------------------------------------------------------------------------------------------------------|
| Vidal 2018, <sup>11</sup><br>USA     | <u>Retrospective cohort</u><br><br>-Participants from SEARCH database that included men from eight Veterans Affairs Medical Centres.<br>Age range: 66 to 87<br><br><u>Follow-up:</u> 2-3 median years | NmCRPC (M0/Mx)<br><br><u>Treatments:</u><br>Primary localised treatment: none, radical prostatectomy and radiation or radiation alone                                                                                                                              | No                                                                                     | BMI calculated from height and weight abstracted from the medical records at the time closest to but prior to CRPC diagnosis (authors note that it was unknown if BMI was measured or self-reported)<br><br><u>Death confirmation:</u><br>Death hand abstracted from medical records based upon individual level chart reviews, supervised by a senior prostate cancer clinician                                                                                                                                                                                                                                             | ACM:<br>809 (1192)                                                                | <i>Cox proportional hazards regression models</i><br><br><u>Adjusted for:</u><br>Veterans Affairs centre and clinical characteristics: age at CRPC, race, year of CRPC diagnosis, treatment centre, primary prostate cancer treatment, biopsy grade group, PSA level at CRPC, Charlson Comorbidity Index                                                                                                                                                                                                                                                                                                                                                                                                                                                                                 |
| Farris 2018, <sup>12</sup><br>Canada | <u>Prospective cohort</u><br><br>Mean age (SD): 67.4 (7.4)<br><br><u>Follow-up:</u> 19 years maximum                                                                                                  | High-risk/advanced tumours: all stage greater than T2<br><br>75% stage T2, 23.2% stage T3/4, 1.8% missing. 78.8% Gleason score<7 and 21.2% Gleason score>7<br><br><u>Treatments:</u><br>28.3% radical prostatectomy, 64.2% hormone therapy 42.9% radiation therapy | Yes, sensitivity analysis excluding deaths occurring in the first 2 years of follow-up | At baseline within six months of diagnosis, interviewers used standardised methods and calibrated weight scales to obtain current adiposity measurements from PCa cases i.e., height, weight, waist circumference and hip circumference.<br>At follow-up 2–3 years post-diagnosis in the prospective cohort study (2000–2002), interviewers assessed the same current anthropometric measurements as done objectively at baseline.<br><br><u>Death confirmation:</u><br>Vital status updates performed to update information on treatment and prostate cancer status by the Alberta Cancer Registry and Cancer Surveillance. | ACM:<br>528 (829)<br><br>PCSM:<br>252 (987)                                       | <i>Cox proportional hazards regression models (presented)</i><br><i>*Testing for potential confounding (through backwards elimination) for the following: total lifetime physical activity, total average alcohol consumption, average daily caloric intake, education level, smoking status diagnosis, family history of cancer, region of residence, Gleason score at diagnosis, and how often (on average) participants went for a general check-up in their lifetime prior to diagnosis of prostate cancer.</i><br><br><u>Adjusted for:</u><br>Age at diagnosis, stage, prostatectomy, hormone therapy, radiation therapy, PSA levels at diagnosis, post-diagnosis Charlson comorbidity index, total average alcohol consumption, region of residence and Gleason score at diagnosis |
| Dickerman 2017, <sup>13</sup><br>USA | <u>Prospective cohort</u><br><br>Participants with PCa diagnosis from the HPFS (cohort of male health professionals).                                                                                 | Clinically localised clinical stage T1/T2<br>Gleason grade: <7, 7 or >7 (mixed)<br><br><u>Treatments:</u><br>Radiation therapy, radical prostatectomy, hormones, no initial treatment/watchful waiting, other                                                      | No                                                                                     | Data on weight at the time of prostate cancer diagnosis. Men reported their current height and weight on the baseline 1986 questionnaire and their current weight every two years thereafter.                                                                                                                                                                                                                                                                                                                                                                                                                                | PCSM<br>371 (5158)<br>*(Lethal prostate cancer i.e., either distant metastasis or | <i>Cox proportional hazards regression models</i><br><br><u>Adjusted for:</u><br>Age at diagnosis, race, family history of prostate cancer, height, smoking status at diagnosis,                                                                                                                                                                                                                                                                                                                                                                                                                                                                                                                                                                                                         |

|                                                                                           |                                                                                                                                                                                                                                                                                                                                                                                                                          |                                                                                                                          |    |                                                                                                                                                                                                                                                                                                                                                                                                                                                                                   |                                                     |                                                                                                                                                                                                                                                         |
|-------------------------------------------------------------------------------------------|--------------------------------------------------------------------------------------------------------------------------------------------------------------------------------------------------------------------------------------------------------------------------------------------------------------------------------------------------------------------------------------------------------------------------|--------------------------------------------------------------------------------------------------------------------------|----|-----------------------------------------------------------------------------------------------------------------------------------------------------------------------------------------------------------------------------------------------------------------------------------------------------------------------------------------------------------------------------------------------------------------------------------------------------------------------------------|-----------------------------------------------------|---------------------------------------------------------------------------------------------------------------------------------------------------------------------------------------------------------------------------------------------------------|
|                                                                                           | <p>Age range: 40 to 75 at enrolment</p> <p><u>Exclusions:</u></p> <ul style="list-style-type: none"> <li>-Men with weight &lt;100 pounds (45.4 kg) at age 21 or at diagnosis</li> <li>-BMI &lt;15 or &gt;45 at age 21 or at diagnosis, weight change &gt;18.1 kg in the 4 years preceding diagnosis and baseline diseases potentially associated with weight status</li> </ul> <p><u>Follow-up:</u> 20 years minimum</p> |                                                                                                                          |    | <p>*Validation study in HPFS showed that self-reported and technician-measured weights were highly correlated (Pearson <math>r=0.97</math>).</p> <p><u>Death confirmation:</u><br/>Review of medical records, physician and patient questionnaires and death certificates.</p>                                                                                                                                                                                                    | death due to prostate cancer):                      | diabetes at diagnosis, heart/lung disease by time of diagnosis, physical activity, energy intake, tomato sauce intake, coffee intake, alpha-linolenic acid and calcium intake, clinical stage, grade, PSA at diagnosis and primary treatment            |
| Taborelli 2017, <sup>14</sup><br>Italy (North-eastern)                                    | <p><u>Retrospective cohort</u></p> <p>Follow-up of cases from a hospital-based case-control study.</p> <p>Age range: 46 to 74 years (median: 66 years).</p> <p><u>Follow-up:</u> 12.7 median years</p>                                                                                                                                                                                                                   | <p>Gleason score: 50.6% 2-6, 36.4% 7-10, 13% unknown</p> <p><u>Treatments:</u><br/>Lack of information on treatments</p> | No | <p>Interviews during hospitalization by trained personnel. Structured questionnaire with information on age, education, and other sociodemographic characteristics, anthropometric measures, lifestyle habits.</p> <p><u>Death confirmation:</u><br/>Record-linkage procedure between the population-based databases of the health systems (Including the mortality database) and the population-based regional cancer registries of Friuli Venezia Giulia and Veneto regions</p> | <p>ACM:<br/>263 (780)</p> <p>PCSM:<br/>81 (780)</p> | <p><i>Cox proportional hazards regression models for ACM and Fine and Gray's regression model for PCSM</i></p> <p><u>Adjusted for:</u><br/>Area of residence at diagnosis, calendar period, age at diagnosis, years of education, and Gleason score</p> |
| Polesel 2015, <sup>15</sup><br>Italy North-eastern<br>(same population as Taborelli 2017) | <p><u>Retrospective cohort</u></p> <p>Follow-up of cases from a hospital-based case-control study.</p> <p>Age range: 46 to 74 years (median: 66 years).</p> <p><u>Exclusions:</u></p>                                                                                                                                                                                                                                    | <p>Gleason score: 2-10 and unknown</p> <p><u>Treatments:</u><br/>Did not undergo treatments</p>                          | No | <p>Interviews during hospitalization by trained personnel. Structured questionnaire with information on age, education, and other sociodemographic characteristics, anthropometric measures, lifestyle habits.</p> <p><u>Death confirmation:</u><br/>Record linkage and death certificates</p>                                                                                                                                                                                    | <p>ACM:<br/>263 (780)</p> <p>PCSM:<br/>81 (780)</p> | <p><i>Cox proportional hazards regression models for ACM and PCSM</i></p> <p><u>Adjusted for:</u><br/>Age at diagnosis, area, and year of diagnosis</p>                                                                                                 |

|                                          |                                                                                                                                                                                                                                                                             |                                                                                                                                                                                                                                                                                                                                                                                                                                                                                                                                                                                                                                                         |                                                                     |                                                                                                                                                                                                                                                                                                                                       |                                          |                                                                                                                                                               |
|------------------------------------------|-----------------------------------------------------------------------------------------------------------------------------------------------------------------------------------------------------------------------------------------------------------------------------|---------------------------------------------------------------------------------------------------------------------------------------------------------------------------------------------------------------------------------------------------------------------------------------------------------------------------------------------------------------------------------------------------------------------------------------------------------------------------------------------------------------------------------------------------------------------------------------------------------------------------------------------------------|---------------------------------------------------------------------|---------------------------------------------------------------------------------------------------------------------------------------------------------------------------------------------------------------------------------------------------------------------------------------------------------------------------------------|------------------------------------------|---------------------------------------------------------------------------------------------------------------------------------------------------------------|
|                                          | 4% refused to participate to the original case-control study, and 3% lost at follow-up due to migration from the study areas<br><br><u>Follow-up: 12.7 median years</u>                                                                                                     |                                                                                                                                                                                                                                                                                                                                                                                                                                                                                                                                                                                                                                                         |                                                                     |                                                                                                                                                                                                                                                                                                                                       |                                          |                                                                                                                                                               |
| Jeong 2015, <sup>16</sup><br>USA         | <u>Retrospective cohort</u><br><br><u>Follow-up: 9 median years</u>                                                                                                                                                                                                         | Gleason score: 2-10<br>T2, T3aF, T3aNF, T3b, LN+<br><br>Treatment:<br>Surgery (no other information for other treatments)                                                                                                                                                                                                                                                                                                                                                                                                                                                                                                                               | No                                                                  | Perioperative obesity collected prospectively and reviewed retrospectively.<br><br><u>Death confirmation:</u><br>Survival status and cause-of-death information were obtained from patient follow-up, the Social Security Administration Death Index, and the Centers for Disease Control National Death Index.                       | ACM: 1300 (15,565)<br>PCSM: 314 (15,565) | <i>Cox proportional hazards regression models</i><br><br><u>Adjusted for:</u><br>T substage, Age, PSA, Positive surgical margins, Gleason score, Surgery year |
| Cantarutti 2015, <sup>17</sup><br>Sweden | <u>Retrospective cohort</u><br><br>Follow-up of cases from a case-control study<br><br>Men originally cases of the CAPS, identified and recruited from four of the six regional cancer registries in Sweden<br>Mean age ~66 years<br><br><u>Follow-up: 11 years maximum</u> | High risk: defined as stage T3/T4 (tumour invades regions adjacent to the prostate), M1 (distant metastases) and N1 (lymph node metastases) at diagnosis, Gleason score >7 and prostate-specific antigen (PSA) ≥20.<br>Low/intermediate risk defined as T1/T2 stage (tumour confined within the prostate), N0 and M0 (no lymph node and no distant metastases) at diagnosis, Gleason score <7 and PSA <20<br><br><u>Treatments:</u><br>Most received no treatment (surveillance), surgery, surgery, and radiation (radiation therapy only received in combination with surgery, i.e., no patients received radiation therapy exclusively), missing data | Yes, excluding men who died within the first two years of follow-up | Self-reported single measurement of BMI: men with PCa filled a short questionnaire about anthropometric data. Time between date of diagnosis and inclusion to the study at the time of returned questionnaire was on average six months.<br><br><u>Death confirmation:</u><br>Linkage to the population-based cause of death registry | ACM: 883 (3,032)<br>PCSM: 658 (3,032)    | <i>Cox proportional hazards regression models</i><br><br><u>Adjusted for:</u><br>Age at inclusion (3-year categories), height and treatment                   |

|                                    |                                                                                                                                                                                                                                                                                                                                                                                                           |                                                                                                                                                                                                                                                                                    |    |                                                                                                                                                                                                                            |                                                                                             |                                                                                                                                                                                                                                                                                                              |
|------------------------------------|-----------------------------------------------------------------------------------------------------------------------------------------------------------------------------------------------------------------------------------------------------------------------------------------------------------------------------------------------------------------------------------------------------------|------------------------------------------------------------------------------------------------------------------------------------------------------------------------------------------------------------------------------------------------------------------------------------|----|----------------------------------------------------------------------------------------------------------------------------------------------------------------------------------------------------------------------------|---------------------------------------------------------------------------------------------|--------------------------------------------------------------------------------------------------------------------------------------------------------------------------------------------------------------------------------------------------------------------------------------------------------------|
| Wu 2015, <sup>18</sup><br>USA      | <u>Retrospective cohort</u><br><br><u>Exclusions:</u><br>-concurrent treatment with other cytotoxic chemotherapeutic agents or targeted therapy<br>-lack of confirmation of metastatic disease,<br>-incomplete medical records,<br>-histological types of prostate cancer other than adenocarcinoma (e.g., small cell cancer), incompatible digital image formats of CT scans<br><br><u>Follow-up:</u> NA | Metastatic PCa<br><u>Treatments:</u><br>Single agent docetaxel chemotherapy                                                                                                                                                                                                        | No | BMI calculated using the recorded height and body weight closest to the date of the CT scan.<br><br><u>Death confirmation:</u> Tumor Registry of MD Anderson Cancer Centre                                                 | ACM: NA (333)                                                                               | <i>Cox proportional hazards regression models</i><br><br><u>Adjusted for:</u><br>Age, >5 years after diagnosis, African race, Gleason score, abnormal serum alkaline phosphatase, visceral fat-to-subcutaneous fat area ratio, visceral fat-to-muscle area ratio, Charlson Comorbidity Index, docetaxel dose |
| Chalfin 2014, <sup>19</sup><br>USA | <u>Retrospective cohort</u><br><br>Mean age (SD): 58 (6.5)<br><br>Follow-up: 5 median years                                                                                                                                                                                                                                                                                                               | Gleason score: 6 or less, 3+4, 4+3, 8-10<br><u>Pathological stage:</u> organ confined, focal/established capsular penetration, seminal vesicle involvement lymph node involvement.<br><u>Treatments:</u><br>Radical prostatectomy at a single tertiary referral centre             | No | At time of surgery<br><br><u>Death confirmation:</u><br>Mortality status and cause of death information from Social Security Administration<br>Death Master File and the Centers for Disease Control National Death Index. | ACM: 827 (11152)<br><br>PCSM: 245 (11152)<br>*Fine and Gray approach<br><br>PCSM: 96 (3214) | <i>Cox proportional hazards regression models for ACM.</i><br><i>Fine and Gray approach for PCSM</i><br><br><u>Adjusted for:</u><br>Age, year of surgery, race, preoperative PSA test, Gleason sum, positive surgical margin                                                                                 |
| Wang 2015, <sup>20</sup><br>USA    | <u>Retrospective cohort</u><br><br>19% diabetes, 58% hypertension, 18% heart disease<br><br><u>Follow-up:</u> 47.6 median months                                                                                                                                                                                                                                                                          | Mixed: Clinically localised (T1b-T4N0M0)<br>Gleason score: 44% 6, 40% 7 and 16% 8-10.<br>33% low risk group, 45% intermediate risk group and 23% high risk<br><br><u>Treatments:</u><br>All treated with definitive intensity-modulated radiotherapy and image-guided radiotherapy | No | Weight and height documented before the initiation of EBRT.<br><br><u>Death confirmation:</u><br>Death certificate, medical record or physicians' notes                                                                    | ACM: 122, (1442)<br><br>PCSM: NA (1442)                                                     | <i>Cox proportional hazards regression models</i><br><br><u>Adjusted for:</u><br>Stage, Gleason score, T classification, PSA level, age, ADT use, comorbidities                                                                                                                                              |

|                                                                                   |                                                                                                                                                                                                                                                                                                                                                                                                                                                                                                                                                                                         |                                                                                                                                                                                                                                                                                                          |                                                                                                                            |                                                                                                                                                                                                                                                                                                                                                                                                                                             |                                               |                                                                                                                                                                                                                                                  |
|-----------------------------------------------------------------------------------|-----------------------------------------------------------------------------------------------------------------------------------------------------------------------------------------------------------------------------------------------------------------------------------------------------------------------------------------------------------------------------------------------------------------------------------------------------------------------------------------------------------------------------------------------------------------------------------------|----------------------------------------------------------------------------------------------------------------------------------------------------------------------------------------------------------------------------------------------------------------------------------------------------------|----------------------------------------------------------------------------------------------------------------------------|---------------------------------------------------------------------------------------------------------------------------------------------------------------------------------------------------------------------------------------------------------------------------------------------------------------------------------------------------------------------------------------------------------------------------------------------|-----------------------------------------------|--------------------------------------------------------------------------------------------------------------------------------------------------------------------------------------------------------------------------------------------------|
|                                                                                   |                                                                                                                                                                                                                                                                                                                                                                                                                                                                                                                                                                                         | 70% no ADT, 30% ADT                                                                                                                                                                                                                                                                                      |                                                                                                                            |                                                                                                                                                                                                                                                                                                                                                                                                                                             |                                               |                                                                                                                                                                                                                                                  |
| Bonn 2014, <sup>21</sup><br>Sweden<br>(Nationwide:<br>six health care<br>regions) | <p><u>Retrospective cohort</u></p> <p>Mean age (SD): 63.0 (5.1)</p> <p><u>Exclusions:</u><br/>-Patients with unknown primary treatment or missing progression data excluded from analysis as the definition of disease progress is dependent on primary treatment.<br/>-Patients primarily treated with hormones<br/>-Patients with unknown date of last record in medical journals or a missing date of termination of deferred treatment and patients with completely missing questionnaire data or incomplete data on self-reported BMI.</p> <p><u>Follow-up:</u> 4 median years</p> | <p>Clinically localised PSA&lt;20 ng/ml; local tumour stage T1–T2; and no signs of lymph node metastasis (NX or N0) or bone metastasis (MX or M0). Gleason score &lt;6, 6 or &gt;6</p> <p><u>Treatments</u><br/>Within 6 months of diagnosis: surveillance, radical prostatectomy, radiation therapy</p> | Yes,<br>sensitivity analysis with 18-months lag time (Model-free i.e., not estimated from a Cox proportional hazard model) | <p>Self-reported current height, weight</p> <p><u>Death confirmation:</u><br/>Swedish Cause-of-Death registry using national identification numbers</p>                                                                                                                                                                                                                                                                                     | <p>ACM: 311 (3214)</p> <p>PCSM: 96 (3214)</p> | <p><i>Cox proportional hazards regression models</i></p> <p><u>Adjusted for:</u><br/>Age at diagnosis, primary treatment, Gleason score at diagnosis, PSA level, T-, N-, and M-stages at diagnosis, smoking habits and total MET-h at age 50</p> |
| Froehner 2014, <sup>22</sup><br>Germany                                           | <p><u>Retrospective cohort</u></p> <p>Mean age: 64.2 years</p> <p><u>Exclusions:</u><br/>-Patients with missing data on Gleason score, local tumour stage or lymph node status</p> <p><u>Follow-up:</u> 8.6 median years</p>                                                                                                                                                                                                                                                                                                                                                            | <p>Clinically localised, Gleason score: (20%) 8-10, (34%) 7 and (46%) &lt;7, some lymph node metastatic disease</p> <p><u>Treatments:</u><br/>Radical prostatectomy at university hospital</p>                                                                                                           | No                                                                                                                         | <p>BMI information obtained from the patient medical records</p> <p><u>Death confirmation:</u><br/>Follow-up data were collected from urologists and/or general practitioners, the patients, relatives, health insurance companies, local authorities or the local tumour register, whichever was necessary. Thereby, only one patient was lost to follow-up. Causes of death were assigned to relevant categories by senior urologist.</p> | <p>ACM: 301 (2131)</p>                        | <p><i>Cox proportional hazards regression models</i></p> <p><u>Adjusted for:</u><br/>Age, Gleason score, American Society of Anaesthesiologists physical status class, Charlson score, stage, pN1</p>                                            |

|                                                          |                                                                                                                                                                                                                                                                                                                                                                                                                |                                                                                                                                                                                                                                                                                                                                     |    |                                                                                                                                                                 |                                           |                                                                                                                                                                                                                                                                                               |
|----------------------------------------------------------|----------------------------------------------------------------------------------------------------------------------------------------------------------------------------------------------------------------------------------------------------------------------------------------------------------------------------------------------------------------------------------------------------------------|-------------------------------------------------------------------------------------------------------------------------------------------------------------------------------------------------------------------------------------------------------------------------------------------------------------------------------------|----|-----------------------------------------------------------------------------------------------------------------------------------------------------------------|-------------------------------------------|-----------------------------------------------------------------------------------------------------------------------------------------------------------------------------------------------------------------------------------------------------------------------------------------------|
| Keto 2012, <sup>23</sup><br>USA                          | <p><u>Retrospective cohort</u><br/>From SEARCH database (Men who underwent RP at five Veterans Affairs Hospitals in USA)</p> <p><u>Exclusions:</u><br/>Men treated with preoperative ADT or radiotherapy.</p> <p><u>Follow-up:</u> 73 median months</p>                                                                                                                                                        | <p>Mixed: Pathological Gleason (2-6, 3 + 4 and <math>\geq 4 + 3</math>) Lymph node metastases (n=18)</p> <p><u>Treatments:</u><br/>Radical prostatectomy and ADT</p>                                                                                                                                                                | No | Height and weight obtained from progress notes within 1 year prior to ADT. Not obtained in a standardized manner and are subject to human error in measurement. | PCSM:<br>24 (287)                         | <p><i>Cox proportional hazards regression models</i></p> <p><u>Adjusted for:</u><br/>Black race, positive surgical margins, seminal vesicle invasion, extracapsular extension, lymph node metastasis, pre-ADT PSA levels, age at ADT start, year of ADT start, pathological Gleason score</p> |
| Smith 2011, <sup>24</sup><br>183 sites of USA and Europe | <p><u>Retrospective cohort.</u><br/>Men from placebo group of a double-blind RCT (Abbott M00-244)<br/>Mean (SD) age: 73 (8) years</p> <p><u>Exclusions:</u><br/>-If had received prior chemotherapy, bisphosphonates, radiopharmaceuticals, or an endothelin receptor antagonist. Subjects with cardiovascular disability (New York Heart Association class 2 or greater) also excluded.<br/>Follow-up: NA</p> | <p>CRPC and no radiographically detectable metastases.<br/>71% Gleason sum<math>\geq</math>7</p> <p><u>Treatments:</u><br/>ADT (bilateral orchiectomy or medical castration) at least three months before randomisation and had castrate testosterone levels at screening.</p>                                                      | No | At baseline<br><br><u>Death confirmation:</u><br>Follow-up                                                                                                      | ACM:<br>66 (331)                          | <p><i>Cox proportional hazards regression models</i></p> <p><u>Adjusted for:</u><br/>Age at baseline, prior prostatectomy, prior orchiectomy, Gleason sum, PSA level, Serum N-telopeptides, bone alkaline phosphatase, albumin, lactate dehydrogenase, and haemoglobin</p>                    |
| Geinitz 2011, <sup>25</sup><br>Germany                   | <p><u>Retrospective cohort</u><br/>Men treated at a single institution.<br/>Median age: 71</p> <p><u>Follow-up:</u> 51 median months</p>                                                                                                                                                                                                                                                                       | <p>Clinically localised PCa. Stage: 18% T1, 58% T2, 24% T3 and 1% T4.<br/>Gleason score: 63% <math>\leq</math>6, 29% 7 and 9% 8-10.17% low risk 76% intermediate risk</p> <p><u>Treatments:</u><br/>Risk-adapted conformal EBRT and endocrine treatment.<br/>None of the patients received treatment to the pelvic lymph nodes.</p> | No | Weight and height before the start of EBRT routinely recorded in the patient charts and used to calculate BMI.<br><br><u>Death confirmation:</u><br>Follow-up   | ACM:<br>NA (564)<br><br>PCSM:<br>NA (564) | <p><i>Cox proportional hazards regression models</i></p> <p><u>Adjusted for:</u><br/>Age, hormonal therapy, T-stage, WHO grade, EBRT dose, Initial PSA levels</p>                                                                                                                             |



|                                                                          |                                                                                                                                                                                                                                                                                                 |                                                                                                                                                                                                                                                                                                                                                                                                                                                                                                                                   |    |                                                                                                                                                                                              |                                                         |                                                                                                                                                                                                                                                                                                                                                                            |
|--------------------------------------------------------------------------|-------------------------------------------------------------------------------------------------------------------------------------------------------------------------------------------------------------------------------------------------------------------------------------------------|-----------------------------------------------------------------------------------------------------------------------------------------------------------------------------------------------------------------------------------------------------------------------------------------------------------------------------------------------------------------------------------------------------------------------------------------------------------------------------------------------------------------------------------|----|----------------------------------------------------------------------------------------------------------------------------------------------------------------------------------------------|---------------------------------------------------------|----------------------------------------------------------------------------------------------------------------------------------------------------------------------------------------------------------------------------------------------------------------------------------------------------------------------------------------------------------------------------|
| Van Roermund 2010, <sup>26</sup><br>Netherlands                          | <p><u>Retrospective cohort</u><br/>Men treated at a single medical centre.<br/>Median age: 67 years</p> <p><u>Exclusions:</u><br/>-Patients with no data on height or weight, missing follow-up data or those who received salvage PPB after EBRT</p> <p><u>Follow-up:</u> 47 median months</p> | <p>Clinically localised PCa.<br/>Three risk groups according to Ash et al:</p> <p><u>Low risk:</u> cT1b–cT2a, low grade (Gleason ≤6 and PSA ≤10 ng/L)<br/><u>High risk:</u> ≥cT3 or PSA level of ≥20 ng/L or ≥2 intermediate risk factors<br/><u>Intermediate risk:</u> The rest</p> <p><u>Treatments:</u><br/>Permanent prostate brachytherapy.<br/>*Different treatment techniques used throughout the study period (1989–2008).<br/>18.4% received ADT (LHRH agonist) for 6 months before permanent prostate brachytherapy</p> | No | <p>Height and weight data were collected retrospectively by reviewing anaesthesia records.</p> <p><u>Death confirmation:</u><br/>Medical record review</p>                                   | <p>ACM:<br/>193 (1530)</p> <p>PCSM:<br/>61 (1530)</p>   | <p><i>Cox proportional hazards regression models</i></p> <p><u>Adjusted for:</u><br/>Age, risk group (low, intermediate, high), treatment period, number of seeds</p>                                                                                                                                                                                                      |
| Davies 2009, <sup>27</sup><br>USA                                        | <p><u>Prospective cohort</u><br/>Men from CAPSURE.<br/>Men recruited consecutively from 40 primarily community-based urology practices across the USA.</p> <p><u>Exclusions:</u><br/>-Men undergoing expectant management</p> <p><u>Follow-up:</u> 44 median months</p>                         | <p>Clinically localised (T1–T3, NX/N0, M0)</p> <p>Gleason scores ranged from 2 to 4 (5%), 5 to 6 (58%), 7 (26%), to 8 to 10 (11%). Clinical staging was T1 (45%), T2 (50%) and T3 (5%)<br/>38% low risk, 35% intermediate risk, 27% high risk by the D’Amico classification.</p> <p><u>Treatments:</u><br/>Initial therapy: RP (53%), ADT (14%), BT (11%), cryotherapy (4%), BT plus EBRT (3%) and RP plus EBRT (1%). Secondary therapy: ADT 79.7%, EBRT 15.6%, cryotherapy 2.1%, BT 2% and RP 0.6%.</p>                          | No | <p>BMI information obtained from the patient records</p> <p><u>Death confirmation:</u><br/>Mortality information is obtained from the Bureau of Vital Statistics or National Death Index</p> | <p>ACM:<br/>1044 (7274)</p> <p>PCSM:<br/>214 (7274)</p> | <p><i>Cox proportional hazards regression models</i></p> <p><u>Adjusted for:</u><br/>Age, clinical risk, presence of diabetes and type of therapy</p>                                                                                                                                                                                                                      |
| Armstrong 2009, <sup>28</sup><br>Multinational (centres in 24 countries) | <p><u>Retrospective cohort</u><br/>Secondary analysis of a TAX327 clinical trial, international phase III randomized trial,<br/>Age range 66 to 70</p> <p><u>Follow-up:</u> 5 years maximum</p>                                                                                                 | <p>mCRPC with evidence of progression</p> <p><u>Treatments:</u><br/>Docetaxel and prednisone or mitoxantrone and prednisone.</p>                                                                                                                                                                                                                                                                                                                                                                                                  | No | <p>Height and weight recorded at baseline (upon trial entry).</p> <p><u>Death confirmation:</u><br/>Follow-up</p>                                                                            | <p>ACM:<br/>800 (1006)</p>                              | <p><i>Cox proportional hazards regression models</i></p> <p><u>Adjusted for:</u><br/>Baseline pain, presence of liver metastases, performance status, haemoglobin, alkaline phosphatase, PSA, PSA doubling time, number of sites of metastatic disease, type of progression (bone scan or measurable disease), high-grade disease (Gleason or WHO) and treatment group</p> |

|                                             |                                                                                                                                                                                                                                                                                                                                                                                                                                                                                                                                    |                                                                                                                                                                                                                                                                                                                                   |    |                                                                                                                                                                     |                                                                     |                                                                                                                                                                                                                                                                                |
|---------------------------------------------|------------------------------------------------------------------------------------------------------------------------------------------------------------------------------------------------------------------------------------------------------------------------------------------------------------------------------------------------------------------------------------------------------------------------------------------------------------------------------------------------------------------------------------|-----------------------------------------------------------------------------------------------------------------------------------------------------------------------------------------------------------------------------------------------------------------------------------------------------------------------------------|----|---------------------------------------------------------------------------------------------------------------------------------------------------------------------|---------------------------------------------------------------------|--------------------------------------------------------------------------------------------------------------------------------------------------------------------------------------------------------------------------------------------------------------------------------|
| Pfitzenmaier 2009, <sup>29</sup><br>Germany | <p><u>Prospective cohort</u></p> <p>Men from a urological cancer database of mid-Europeans.<br/>Median age: 64.3 years</p> <p><u>Follow-up:</u> 5.5 median years</p>                                                                                                                                                                                                                                                                                                                                                               | <p>Either organ-confined or locally advanced with extracapsular extension. Non-metastatic.</p> <p><u>Treatments:</u><br/>Radical prostatectomy<br/>Some also received: neoadjuvant hormonal therapy, adjuvant hormonal therapy, adjuvant radiotherapy, adjuvant hormonal and radiotherapy or neoadjuvant and adjuvant therapy</p> | No | <p>Baseline</p> <p><u>Death confirmation:</u><br/>Follow-up</p>                                                                                                     | ACM:<br>89 (620)                                                    | <p><i>Cox proportional hazards regression models</i></p> <p><u>Adjusted for:</u><br/>Age, tumour extension, lymph node, tumour grading, PSA level, resection margin, year of surgery.</p>                                                                                      |
| Halabi 2007, <sup>30</sup><br>USA           | <p><u>Retrospective cohort</u></p> <p>Secondary analysis of men treated on 9 CALGB multi-institutional clinical trials.<br/>Median age:</p> <p><u>Exclusions:</u><br/>-Patients who had received prior treatment with chemotherapy, immunotherapy, or other nonhormonal therapy were excluded from these trials.<br/>-There were 11 men who were underweight (BMI &lt;18.5 kg/m<sup>2</sup>) and were excluded from the analysis.<br/>-If had either missing height or weight data</p> <p><u>Follow-up:</u> 33.8 median months</p> | <p>Advanced PCa<br/>mCRPC Gleason score: 8% 2-4, 47% 5-7 and 44% 8-10</p> <p><u>Treatments:</u><br/>53% prior radiotherapy<br/>25% prostatectomy<br/>65% LHRH agonists<br/>44% surgical castration</p>                                                                                                                            | No | <p>BMI at study entry</p> <p><u>Death confirmation:</u><br/>Cause of death determined based on the case report forms submitted by the local treating physician.</p> | <p>ACM<br/>1152<br/>(1226)</p> <hr/> <p>PCSM<br/>968<br/>(1226)</p> | <p><i>Cox proportional hazards regression models</i></p> <p><u>Adjusted for:</u><br/>ECOG performance status, presence of visceral disease, prior radiotherapy, Gleason score, age, testosterone, haemoglobin, race, alkaline phosphatase, years since diagnosis, PSA, LDH</p> |

|                                                                                                                                                                                                                                                                                                                                                                                                                                                                                                                                                                                                                                                                                                                                                                                                                                                                                                                                                                                                                                       |                                                                                                                                                                                                                                                          |                                                                                                                                                                                                                                                                                                                                                                                                                                                                                                                                                                                                                                 |    |                                                                                                                                                                                                                   |                                               |                                                                                                                                                                                             |
|---------------------------------------------------------------------------------------------------------------------------------------------------------------------------------------------------------------------------------------------------------------------------------------------------------------------------------------------------------------------------------------------------------------------------------------------------------------------------------------------------------------------------------------------------------------------------------------------------------------------------------------------------------------------------------------------------------------------------------------------------------------------------------------------------------------------------------------------------------------------------------------------------------------------------------------------------------------------------------------------------------------------------------------|----------------------------------------------------------------------------------------------------------------------------------------------------------------------------------------------------------------------------------------------------------|---------------------------------------------------------------------------------------------------------------------------------------------------------------------------------------------------------------------------------------------------------------------------------------------------------------------------------------------------------------------------------------------------------------------------------------------------------------------------------------------------------------------------------------------------------------------------------------------------------------------------------|----|-------------------------------------------------------------------------------------------------------------------------------------------------------------------------------------------------------------------|-----------------------------------------------|---------------------------------------------------------------------------------------------------------------------------------------------------------------------------------------------|
| Efstathiou 2007, <sup>31</sup><br>USA                                                                                                                                                                                                                                                                                                                                                                                                                                                                                                                                                                                                                                                                                                                                                                                                                                                                                                                                                                                                 | <u>Retrospective cohort</u><br>Secondary analysis of a phase III trial RTOG 85-31<br><br><u>Exclusions:</u><br>Patients with bulky primary lesions (product of palpable tumour dimensions >25 cm) not eligible<br><br><u>Follow-up:</u> 8.1 median years | Locally advanced prostate cancer histologically confirmed adenocarcinoma of the prostate and either had grossly palpable tumor beyond the confines of the prostate (clinical stage T3) or documented involvement of the regional lymphatics. Patients with primary tumor confined to the prostate (clinical stage T1-2) were eligible if there was evidence of spread to the regional lymph nodes either radiographically or histologically.<br><br><u>Treatments:</u><br>Radical prostatectomy and radiation therapy. Radiation therapy and immediate goserelin or radiation therapy alone followed by goserelin at recurrence | No | BMI calculated using patient height and weight data as measured at baseline (upon trial entry)<br><br><u>Death confirmation:</u><br>Follow-up                                                                     | ACM:<br>476 (788)<br><br>PCSM:<br>169 (788)   | <i>Cox proportional hazards regression models</i><br><br><u>Adjusted for:</u> Age, race, treatment arm, prostatectomy, nodal involvement, Gleason score, clinical stage                     |
| Siddiqui 2006, <sup>32</sup><br>USA                                                                                                                                                                                                                                                                                                                                                                                                                                                                                                                                                                                                                                                                                                                                                                                                                                                                                                                                                                                                   | <u>Prospective cohort</u><br><br><u>Exclusions:</u><br>-Patients who received neoadjuvant therapies prior to surgery<br>-If refused research authorization, or<br>-If not have their BMI recorded<br><br><u>Follow-up:</u> 10.1 median years             | High and low risk PCa<br>*a higher proportion of the patients in the current study have high-risk PCa<br><br><u>Pathologic Gleason score:</u><br>458 Gleason score<6, 347 Gleason score=6, 307 Gleason score=7, 48 Gleason score 8+<br><u>Pathologic stage:</u><br>n=307: T2AN0<br>n=478: T2Bn0<br>n=306: T34N0<br>n=72: TxN+<br><br><u>Treatments:</u><br>Radical retropubic prostatectomy and pelvic lymphadenectomy and adjuvant therapy (any form of ADT or radiation therapy within 90 days of surgery).                                                                                                                   | No | BMI calculated using patient height and weight as measured on the day of surgery.<br><br><u>Death confirmation:</u><br>Cause of death verified by death certificates or correspondence to the treating physician. | ACM:<br>967 (5313)<br><br>PCSM:<br>151 (5313) | <i>Cox proportional hazards regression models</i><br><br><u>Adjusted for:</u><br>Pathologic Gleason score, pre-operation PSA, positive seminal vesicle, positive margin, adjuvant treatment |
| Abbreviations: ACM All-cause mortality, PCSM Prostate cancer-specific mortality, PCa Prostate cancer, BMI Body mass index, CT Computed tomography, EBRT external beam radiation therapy, ADT androgen deprivation therapy, RT radical prostatectomy, PCa Prostate Cancer, WHO World Health Organisation, NA Not available, mCRPC Metastatic castrate-resistant prostate cancer, mHSPC Metastatic hormone-sensitive prostate cancer, nmCRPC Nonmetastatic castrate-resistant prostate cancer, PROSCARE the Prostate Cancer Risk Evaluation study, CPS II Nutrition Cohort Cancer Prevention Study II Nutrition Cohort, PA physical activity, CRPC castration-resistant prostate cancer, SD standard deviation, IQR Inter-quartile range, CAPS Cancer Prostate in Sweden, PSA Prostate-specific antigen, PROCAP, PROgression in CAncer of the Prostate, CAPSURE the Cancer of the Prostate Strategic Urological Research Endeavor database, USA United States of America., BT brachytherapy, HPFS Health Professionals Follow-up Study. |                                                                                                                                                                                                                                                          |                                                                                                                                                                                                                                                                                                                                                                                                                                                                                                                                                                                                                                 |    |                                                                                                                                                                                                                   |                                               |                                                                                                                                                                                             |

## References

1. Verma S, Arora S, Sahoo RK, *et al.* Differential effect of body mass index (BMI) on outcomes of patients treated with docetaxel in prostate cancer - An exploratory analysis. *Cancer Treat Res Commun* 2022;31:100520.
2. Martini A, Shah QN, Waingankar N, *et al.* The obesity paradox in metastatic castration-resistant prostate cancer. *Prostate Cancer Prostatic Dis* 2021.
3. Jackson MD, Tulloch-Reid MK, McCaw-Binns AM, *et al.* Central adiposity at diagnosis may reduce prostate cancer-specific mortality in African-Caribbean men with prostate cancer: 10-year follow-up of participants in a case-control study. *Cancer Causes Control* 2020;31(7):651-62.
4. Xu MC, Huelster HL, Hatcher JB, *et al.* Obesity is Associated with Longer Survival Independent of Sarcopenia and Myosteatosis in Metastatic and/or Castrate-Resistant Prostate Cancer. *J Urol* 2020.
5. Kashiwagi E, Shiota M, Masaoka H, *et al.* Relationship between body composition and hormone sensitivity for androgen deprivation therapy in patients with metastatic prostate cancer. *Prostate Int* 2020;8(1):22-6.
6. Troeschel AN, Hartman TJ, Jacobs EJ, *et al.* Postdiagnosis Body Mass Index, Weight Change, and Mortality From Prostate Cancer, Cardiovascular Disease, and All Causes Among Survivors of Nonmetastatic Prostate Cancer. *J Clin Oncol* 2020;38(18):2018-27.
7. Stangl-Kremser J, Suarez-Ibarrola R, Andrea D, *et al.* Assessment of body composition in the advanced stage of castration-resistant prostate cancer: special focus on sarcopenia. *Prostate Cancer Prostatic Dis* 2020;23(2):309-15.
8. Ikeda T, Ishihara H, Iizuka J, *et al.* Prognostic impact of sarcopenia in patients with metastatic hormone-sensitive prostate cancer. *Jpn J Clin Oncol* 2020;50(8):933-9.
9. Abdel-Rahman O. Impact of Diabetes on the Outcomes of Patients With Castration-resistant Prostate Cancer Treated With Docetaxel: A Pooled Analysis of Three Phase III Studies. *Clin Genitourin Cancer* 2019;17(1):e104-e12.
10. Darcey E, Pereira G, Salter A, *et al.* The Impact of Lifestyle-related Factors on Survival After a Prostate Cancer Diagnosis. *Eur Urol* 2019;75(5):884-5.
11. Vidal AC, Howard LE, de Hoedt A, *et al.* Obese patients with castration-resistant prostate cancer may be at a lower risk of all-cause mortality: results from the Shared Equal Access Regional Cancer Hospital (SEARCH) database. *BJU Int* 2018;122(1):76-82.
12. Farris MS, Courneya KS, Kopciuk KA, *et al.* Anthropometric measurements and survival after a prostate cancer diagnosis. *Br J Cancer* 2018;118(4):607-10.
13. Dickerman BA, Ahearn TU, Giovannucci E, *et al.* Weight change, obesity and risk of prostate cancer progression among men with clinically localized prostate cancer. *Int J Cancer* 2017;141(5):933-44.
14. Taborelli M, Polesel J, Parpinel M, *et al.* Fruit and vegetables consumption is directly associated to survival after prostate cancer. *Mol Nutr Food Res* 2017;61(4).
15. Polesel J, Gini A, Dal Maso L, *et al.* The negative impact of tobacco smoking on survival after prostate cancer diagnosis. *Cancer Causes Control* 2015;26(9):1299-305.
16. Jeong BC, Chalfin HJ, Lee SB, *et al.* The relationship between the extent of extraprostatic extension and survival following radical prostatectomy. *Eur Urol* 2015;67(2):342-6.
17. Cantarutti A, Bonn SE, Adami HO, *et al.* Body mass index and mortality in men with prostate cancer. *Prostate* 2015;75(11):1129-36.
18. Wu W, Liu X, Chaftari P, *et al.* Association of body composition with outcome of docetaxel chemotherapy in metastatic prostate cancer: a retrospective review. *PLoS One* 2015;10(3):e0122047.
19. Chalfin HJ, Lee SB, Jeong BC, *et al.* Obesity and long-term survival after radical prostatectomy. *J Urol* 2014;192(4):1100-4.
20. Wang LS, Murphy CT, Ruth K, *et al.* Impact of obesity on outcomes after definitive dose-escalated intensity-modulated radiotherapy for localized prostate cancer. *Cancer* 2015;121(17):3010-7.
21. Bonn SE, Wiklund F, Sjölander A, *et al.* Body mass index and weight change in men with prostate cancer: progression and mortality. *Cancer Causes Control* 2014;25(8):933-43.
22. Froehner M, Kellner AE, Koch R, *et al.* A combined index to classify prognostic comorbidity in candidates for radical prostatectomy. *BMC Urol* 2014;14:28.
23. Keto CJ, Aronson WJ, Terris MK, *et al.* Obesity is associated with castration-resistant disease and metastasis in men treated with androgen deprivation therapy after radical prostatectomy: results from the SEARCH database. *BJU Int* 2012;110(4):492-8.

24. Smith MR, Cook R, Lee KA, *et al.* Disease and host characteristics as predictors of time to first bone metastasis and death in men with progressive castration-resistant nonmetastatic prostate cancer. *Cancer* 2011;117(10):2077-85.
25. Geinitz H, Thamm R, Mueller T, *et al.* Impact of body mass index on outcomes after conformal radiotherapy in patients with prostate cancer. *Int J Radiat Oncol Biol Phys* 2011;81(1):16-22.
26. van Roermund JG, Hinnen KA, Battermann JJ, *et al.* Body mass index is not a prognostic marker for prostate-specific antigen failure and survival in Dutch men treated with brachytherapy. *BJU Int* 2010;105(1):42-8.
27. Davies BJ, Smaldone MC, Sadetsky N, *et al.* The impact of obesity on overall and cancer specific survival in men with prostate cancer. *J Urol* 2009;182(1):112-7.
28. Armstrong AJ, Halabi S, de Wit R, *et al.* The relationship of body mass index and serum testosterone with disease outcomes in men with castration-resistant metastatic prostate cancer. *Prostate Cancer Prostatic Dis* 2009;12(1):88-93.
29. Pfitzenmaier J, Pritsch M, Haferkamp A, *et al.* Is the body mass index a predictor of adverse outcome in prostate cancer after radical prostatectomy in a mid-European study population? *BJU Int* 2009;103(7):877-82.
30. Halabi S, Ou SS, Vogelzang NJ, *et al.* Inverse correlation between body mass index and clinical outcomes in men with advanced castration-recurrent prostate cancer. *Cancer* 2007;110(7):1478-84.
31. Efstathiou JA, Bae K, Shipley WU, *et al.* Obesity and mortality in men with locally advanced prostate cancer: analysis of RTOG 85-31. *Cancer* 2007;110(12):2691-9.
32. Siddiqui SA, Inman BA, Sengupta S, *et al.* Obesity and survival after radical prostatectomy: A 10-year prospective cohort study. *Cancer* 2006;107(3):521-9.

| <b>Supplementary Table 4A Studies excluded from the linear dose-response meta-analysis of post diagnosis BMI and all-cause mortality</b>                                                                                                                    |                                                                                                                                                                                                                                                                                                      |
|-------------------------------------------------------------------------------------------------------------------------------------------------------------------------------------------------------------------------------------------------------------|------------------------------------------------------------------------------------------------------------------------------------------------------------------------------------------------------------------------------------------------------------------------------------------------------|
| <b>67 publications identified that included more than 100 men. Of these 61 assessed BMI post-diagnosis</b>                                                                                                                                                  | <b>First author, Year</b>                                                                                                                                                                                                                                                                            |
| BMI assessed before PCa diagnosis (n=6)                                                                                                                                                                                                                     | Park 2006, <sup>1</sup> DeRouen 2018, <sup>2</sup> Polesel 2016, <sup>3</sup> Reichle 2015, <sup>4</sup> Nair-Shalliker 2020 <sup>5</sup> and Kim 2017 <sup>6</sup>                                                                                                                                  |
| <b>Reason for exclusion from linear-dose response meta-analysis</b>                                                                                                                                                                                         |                                                                                                                                                                                                                                                                                                      |
| Combined BMI and pre-diagnosis weight loss (n=1)                                                                                                                                                                                                            | Martinez-Tapia 2020 <sup>7</sup>                                                                                                                                                                                                                                                                     |
| Overlapping population (n=3)                                                                                                                                                                                                                                | From CAPSURE: Langlais 2019 <sup>8</sup> used Davies 2009 <sup>9</sup><br>From the Italian study: Polesel 2015 <sup>10</sup> used Taborelli 2017 <sup>11</sup><br>Post-hoc trial analysis: Modonutti 2022 <sup>12</sup> used Verma 2022 <sup>13</sup> and Martini 2021 <sup>14</sup>                 |
| Only univariate/crude estimate provided (n=7)                                                                                                                                                                                                               | Tendulkar 2013, <sup>15</sup> Pak 2020, <sup>16</sup> Pak 2019, <sup>17</sup> Gravis 2015, <sup>18</sup> Frantellizzi 2020, <sup>19</sup> Koo 2015, <sup>20</sup> Han 2010 <sup>21</sup>                                                                                                             |
| Only dichotomous estimate provided (n=8)                                                                                                                                                                                                                    | DiBella 2020, <sup>22</sup> Heo 2018, <sup>23</sup> Rudman 2016, <sup>24</sup> Antoun 2015, <sup>25</sup> Hu 2018, <sup>26</sup> Greenlee 2017, <sup>27</sup> Lee 2020 <sup>28</sup> , Pan 2021 <sup>29</sup>                                                                                        |
| Only Kaplan Meier/p-values provided (or only Figure) (n=11)                                                                                                                                                                                                 | Delouya 2018, <sup>30</sup> Tomaszewski 2013, <sup>31</sup> Kim 2017, <sup>32</sup> Palma 2007, <sup>33</sup> Merrick 2007, <sup>34</sup> Fang 2011, <sup>35</sup> Taira 2011, <sup>36</sup> Taira 2010, <sup>37</sup> Taira 2012 <sup>38</sup> , Merrick 2021 <sup>39</sup> , Tu 2022 <sup>40</sup> |
| Lacked necessary data and/or could not be estimated using standard methods (Bekkering) (n=5)                                                                                                                                                                | Chalfin 2014, <sup>41</sup> Montgomery 2007, <sup>42</sup> Wu 2015, <sup>43</sup> Halabi 2007, <sup>44</sup> Geinitz 2011 <sup>45</sup>                                                                                                                                                              |
| Different definition of obesity and could not combine (n=1)<br>*Patients being classified as obese or non-obese according to the National Health and Nutrition Examination Survey (NHANES) standards for obesity i.e., fat mass index > 9 kg/m <sup>2</sup> | Mason 2018 <sup>46</sup>                                                                                                                                                                                                                                                                             |
| <b>Reason for exclusion from non-linear dose-response meta-analysis (but included in linear dose-response meta-analysis)</b>                                                                                                                                |                                                                                                                                                                                                                                                                                                      |
| Only provided continuous estimate (i.e., only analysed the exposure on continuous scale) (n=8)                                                                                                                                                              | Xu 2020, <sup>47</sup> Stangl-Kremser 2020, <sup>48</sup> Wang 2015, <sup>49</sup> Siddiqui 2006, <sup>50</sup> Ikeda 2020, <sup>51</sup> Kashiwagi 2020, <sup>52</sup> Jeong 2015, <sup>53</sup> Abdel-Rahman 2019 <sup>54</sup>                                                                    |
| ¥In addition, focus on building prognostic models and had prognostication aims.                                                                                                                                                                             |                                                                                                                                                                                                                                                                                                      |

| <b>Supplementary Table 4B Studies excluded from the categorical meta-analysis of BMI and all-cause mortality</b>                                                                                                                                           |                                                                                                                                                                                                                                                                                                                                                                                                                                             |
|------------------------------------------------------------------------------------------------------------------------------------------------------------------------------------------------------------------------------------------------------------|---------------------------------------------------------------------------------------------------------------------------------------------------------------------------------------------------------------------------------------------------------------------------------------------------------------------------------------------------------------------------------------------------------------------------------------------|
| <b>Reason for exclusion</b>                                                                                                                                                                                                                                | <b>First author, Year</b>                                                                                                                                                                                                                                                                                                                                                                                                                   |
| Combined BMI and pre-diagnosis weight loss (n=1)                                                                                                                                                                                                           | Martinez-Tapia 2020 <sup>7</sup>                                                                                                                                                                                                                                                                                                                                                                                                            |
| Only provided continuous estimate i.e., analysed the exposure on continuous scale (n=8)                                                                                                                                                                    | Xu 2020, <sup>47</sup> Stangl-Kremser 2020, <sup>48</sup> Wang 2015, <sup>49</sup> Siddiqui 2006, <sup>50</sup> Ikeda 2020, <sup>51</sup> Kashiwagi 2020, <sup>52</sup> Jeong 2015, <sup>53</sup> Abdel-Rahman 2019 <sup>54</sup>                                                                                                                                                                                                           |
| Only univariate/crude estimate provided (n=7)                                                                                                                                                                                                              | Pak 2020, <sup>16</sup> Pak 2019, <sup>17</sup> Gravis 2015, <sup>18</sup> Tendulkar 2013, <sup>15</sup> Han 2010, <sup>21</sup> Koo 2015, <sup>20</sup> Frantellizzi 2020 <sup>19</sup>                                                                                                                                                                                                                                                    |
| Only p-value/Kaplan Meier (or only Figure) (n=11)                                                                                                                                                                                                          | Delouya 2018, <sup>30</sup> Kim 2017, <sup>32</sup> Tomaszewski 2013, <sup>31</sup> Fang 2011, <sup>35</sup> Taira 2011, <sup>36</sup> Taira 2010, <sup>37</sup> Taira 2012, <sup>38</sup> Palma 2007, <sup>33</sup> Merrick 2007 <sup>34</sup> Merrick 2021 <sup>39</sup> , Tu 2022 <sup>40</sup>                                                                                                                                          |
| Overlapping population (n=4)                                                                                                                                                                                                                               | From CAPSURE: Langlais 2019 <sup>8</sup> used Davies 2009 <sup>9</sup> instead.<br>From SWOG trials: Greenlee 2017, <sup>27</sup> used Montgomery <sup>42</sup> 2007 instead.<br>From the Italian case-control study: Polesel 2015 <sup>10</sup> Used Taborelli 2017 instead.<br>Post-hoc trial analysis: Modonutti 2022 <sup>12</sup> used Verma 2022 <sup>13</sup> and Martini 2021 <sup>14</sup>                                         |
| Different definition of obesity and could not combine (n=1)<br>*Patients being classified as obese or non-obese according to the National Health and Nutrition Examination Survey (NHANES) standards for obesity i.e., fat mass index > 9kg/m <sup>2</sup> | Mason 2018 <sup>46</sup>                                                                                                                                                                                                                                                                                                                                                                                                                    |
| Excluded from analysis of overweight vs normal weight and/or obese vs normal because <u>either they only provided dichotomous estimate</u> comparing obese vs non-obese (i.e., 25 vs 25 or >=30 vs <30) or <u>not WHO categories</u> (n=11)                | DiBella 2020 <sup>22</sup> , Heo 2018, <sup>23</sup> Hu 2018 <sup>26</sup> , Rudman 2016 <sup>24</sup> , Antoun 2015 <sup>25</sup> and Froehner 2014, <sup>55</sup> Lee 2020, <sup>28</sup> Montgomery 2007 <sup>42</sup> (different categories than WHO) Cantarutti 2015 <sup>56</sup> (different categories than WHO) and Chalfin 2014 <sup>41</sup> (different categories than WHO for obese vs normal category), Pan 2021 <sup>29</sup> |
| ¥In addition, focus was on building prognostic models and had prognostication aims.                                                                                                                                                                        |                                                                                                                                                                                                                                                                                                                                                                                                                                             |

| <b>Supplementary Table 4C Studies excluded from the linear dose-response meta-analysis of BMI and PCa-specific mortality</b> |                                                                                                                                                                                                                                                                                                                                                                                                                                                                                                                                        |
|------------------------------------------------------------------------------------------------------------------------------|----------------------------------------------------------------------------------------------------------------------------------------------------------------------------------------------------------------------------------------------------------------------------------------------------------------------------------------------------------------------------------------------------------------------------------------------------------------------------------------------------------------------------------------|
| <b>45 publications identified that included more than 100 men. Of these 36 assessed BMI post-diagnosis</b>                   |                                                                                                                                                                                                                                                                                                                                                                                                                                                                                                                                        |
| BMI assessed before PCa diagnosis (n=9)                                                                                      | DeRouen 2018, <sup>2</sup> Polesel 2016, <sup>3</sup> Reichle 2015, <sup>4</sup> Nair-Shalliker 2020, <sup>5</sup> Kim 2017, <sup>32</sup> Moller 2015, <sup>57</sup> Ma 2008, <sup>58</sup> Aarestrup 2015, <sup>59</sup> Gong 2007 <sup>60</sup>                                                                                                                                                                                                                                                                                     |
| <b>Reason for exclusion from linear-dose response analysis</b>                                                               | <b>First author, Year</b>                                                                                                                                                                                                                                                                                                                                                                                                                                                                                                              |
| Overlapping population (n=4)                                                                                                 | From SEARCH database: Vidal 2017, <sup>61</sup> Vidal 2018 <sup>62</sup> and Vidal 2020 <sup>63</sup> from SEARCH database and used Keto 2012 <sup>64</sup> instead<br>*Also, Vidal publications used competing-risks regression analysis so another reason why Keto 2012 was used.<br>From the cases of the Italian case-control study: Taborelli 2017 <sup>11</sup> Used Polesel 2015 instead.<br>*Also, Taborelli 2017 <sup>11</sup> used competing-risks regression so another reason why Polesel 2015 <sup>10</sup> used instead. |
| Only univariate-crude estimate provided (n=5)                                                                                | Koo 2015, <sup>65</sup> Lee 2018, <sup>66</sup> Tendulkar 2013, <sup>15</sup> McDonald 2017 <sup>67</sup> , Chiang 2022 <sup>68</sup>                                                                                                                                                                                                                                                                                                                                                                                                  |
| Only dichotomous estimate provided (n=5)                                                                                     | Meyer 1999, <sup>69</sup> DiBella 2020, <sup>22</sup> Rudman 2016, <sup>24</sup> Bluethmann 2020 <sup>70</sup> Huang 2019 <sup>71</sup>                                                                                                                                                                                                                                                                                                                                                                                                |
| Only Kaplan Meier/p-values (n=2)                                                                                             | Palma 2007, <sup>33</sup> Taira 2012 <sup>38</sup>                                                                                                                                                                                                                                                                                                                                                                                                                                                                                     |
| Lacked necessary data and/or could not be estimated using standard methods (Bekkering) (n=4)                                 | Chalfin 2014, <sup>41</sup> Yu 2018, <sup>72</sup> Halabi 2007, <sup>44</sup> Geinitz 2011 <sup>45</sup>                                                                                                                                                                                                                                                                                                                                                                                                                               |
| <b>Reason for exclusion from non-linear dose-response meta-analysis (included in linear dose-response meta-analysis)</b>     |                                                                                                                                                                                                                                                                                                                                                                                                                                                                                                                                        |
| Only provided continuous estimate i.e., analysed the exposure on continuous scale (n=3)                                      | Siddiqui 2006 <sup>50</sup> and Wang 2015 <sup>49</sup> Jeong 2015 <sup>53</sup>                                                                                                                                                                                                                                                                                                                                                                                                                                                       |

| <b>Supplementary Table 4D Studies excluded from the categorical meta-analysis of BMI and PCa-specific mortality</b>                                                                                                                        |                                                                                                                                                                                                                                                                                                                                                                                                                                                    |
|--------------------------------------------------------------------------------------------------------------------------------------------------------------------------------------------------------------------------------------------|----------------------------------------------------------------------------------------------------------------------------------------------------------------------------------------------------------------------------------------------------------------------------------------------------------------------------------------------------------------------------------------------------------------------------------------------------|
| <b>Reason for exclusion</b>                                                                                                                                                                                                                | <b>First author, Year</b>                                                                                                                                                                                                                                                                                                                                                                                                                          |
| Only provided continuous estimate i.e., analysed the exposure on continuous scale (n=3)                                                                                                                                                    | Wang 2015, <sup>49</sup> Jeong 2015, <sup>53</sup> Siddiqui 2006 <sup>50</sup>                                                                                                                                                                                                                                                                                                                                                                     |
| Only univariate-crude estimate provided (n=5)                                                                                                                                                                                              | Koo 2015, <sup>65</sup> Lee 2018, <sup>66</sup> Tendulkar 2013, <sup>15</sup> McDonald 2017 <sup>67</sup> , Chiang 2022 <sup>68</sup>                                                                                                                                                                                                                                                                                                              |
| Only Kaplan Meier/p-values (n=2)                                                                                                                                                                                                           | Palma 2007 <sup>33</sup> and Taira 2012 <sup>38</sup>                                                                                                                                                                                                                                                                                                                                                                                              |
| Overlapping population (n=4)                                                                                                                                                                                                               | From SEARCH database: Vidal 2017, <sup>61</sup> Vidal 2018 <sup>62</sup> and Vidal 2020 <sup>63</sup> from SEARCH database and used Keto 2012 <sup>64</sup> instead *Also, Vidal publications used competing-risks regression analysis so another reason why Keto 2012 was used. From the cases of the Italian case-control study: Taborelli 2017 <sup>11</sup> Used Polesel 2015 <sup>10</sup> instead (Taborelli also conducted competing risks) |
| Excluded from analysis of overweight vs normal weight and/or obese vs normal because <u>either they only provided dichotomous estimate</u> comparing obese vs non-obese (i.e., 25 vs 25 or >=30 vs <30) or <u>not WHO categories (n=8)</u> | DiBella 2020, <sup>22</sup> Rudman 2016, <sup>24</sup> Bluethmann 2020, <sup>70</sup> Meyer 1999, <sup>69</sup> Huang 2019, <sup>71</sup> Chalfin 2014, <sup>41</sup> (different categories than WHO for obese vs normal category) Yu 2018, <sup>72</sup> (different categories than WHO) Cantarutti 2015 <sup>56</sup> (different categories than WHO)                                                                                            |

## References

1. Park SM, Lim MK, Shin SA, *et al.* Impact of prediagnosis smoking, alcohol, obesity, and insulin resistance on survival in male cancer patients: National Health Insurance Corporation Study. *J Clin Oncol* 2006;24(31):5017-24.
2. DeRouen MC, Schupp CW, Koo J, *et al.* Impact of individual and neighborhood factors on disparities in prostate cancer survival. *Cancer Epidemiol* 2018;53:1-11.
3. Polesel J, Gini A, Dal Maso L, *et al.* The impact of diabetes and other metabolic disorders on prostate cancer prognosis. *J Diabetes Complications* 2016;30(4):591-6.
4. Reichle K, Peter RS, Concin H, *et al.* Associations of pre-diagnostic body mass index with overall and cancer-specific mortality in a large Austrian cohort. *Cancer Causes and Control* 2015;26(11):1643-52.
5. Nair-Shalliker V, Bang A, Egger S, *et al.* Post-treatment levels of plasma 25- and 1,25-dihydroxy vitamin D and mortality in men with aggressive prostate cancer. *Sci Rep* 2020;10(1):7736.
6. Kim SH, Joung JY, Suh YS, *et al.* Prevalence and survival prognosis of prostate cancer in patients with end-stage renal disease: a retrospective study based on the Korea national database (2003-2010). *Oncotarget* 2017;8(38):64250-62.
7. Martinez-Tapia C, Diot T, Oubaya N, *et al.* The obesity paradox for mid- and long-term mortality in older cancer patients: a prospective multicenter cohort study. *Am J Clin Nutr* 2020.
8. Langlais CS, Cowan JE, Neuhaus J, *et al.* Obesity at Diagnosis and Prostate Cancer Prognosis and Recurrence Risk Following Primary Treatment by Radical Prostatectomy. *Cancer Epidemiol Biomarkers Prev* 2019;28(11):1917-25.
9. Davies BJ, Smaldone MC, Sadetsky N, *et al.* The impact of obesity on overall and cancer specific survival in men with prostate cancer. *J Urol* 2009;182(1):112-7.
10. Polesel J, Gini A, Dal Maso L, *et al.* The negative impact of tobacco smoking on survival after prostate cancer diagnosis. *Cancer Causes Control* 2015;26(9):1299-305.
11. Taborelli M, Polesel J, Parpinel M, *et al.* Fruit and vegetables consumption is directly associated to survival after prostate cancer. *Mol Nutr Food Res* 2017;61(4).
12. Modonutti D, Majdalany SE, Corsi N, *et al.* A novel prognostic model predicting overall survival in patients with metastatic castration-resistant prostate cancer receiving standard chemotherapy: A multi-trial cohort analysis. *Prostate* 2022;82(13):1293-303.
13. Verma S, Arora S, Sahoo RK, *et al.* Differential effect of body mass index (BMI) on outcomes of patients treated with docetaxel in prostate cancer - An exploratory analysis. *Cancer Treat Res Commun* 2022;31:100520.
14. Martini A, Shah QN, Waingankar N, *et al.* The obesity paradox in metastatic castration-resistant prostate cancer. *Prostate Cancer Prostatic Dis* 2021.

15. Tendulkar RD, Hunter GK, Reddy CA, *et al.* Causes of mortality after dose-escalated radiation therapy and androgen deprivation for high-risk prostate cancer. *Int J Radiat Oncol Biol Phys* 2013;87(1):94-9.
16. Pak S, Kim MS, Park EY, *et al.* Association of Body Composition With Survival and Treatment Efficacy in Castration-Resistant Prostate Cancer. *Front Oncol* 2020;10:558.
17. Pak S, Park SY, Shin TJ, *et al.* Association of Muscle Mass with Survival after Radical Prostatectomy in Patients with Prostate Cancer. *J Urol* 2019;202(3):525-32.
18. Gravis G, Boher JM, Fizazi K, *et al.* Prognostic Factors for Survival in Noncastrate Metastatic Prostate Cancer: Validation of the Glass Model and Development of a Novel Simplified Prognostic Model. *Eur Urol* 2015;68(2):196-204.
19. Frantellizzi V, Monari F, Mascia M, *et al.* Overall survival in mCPRC patients treated with Radium-223 in association with Bone Health Agents: A national multicenter study. *Int J Radiat Biol* 2020:1-18.
20. Koo KC, Yoo H, Kim KH, *et al.* Prognostic impact of synchronous second primary malignancies on the overall survival of patients with metastatic prostate cancer. *J Urol* 2015;193(4):1239-44.
21. Han M, Trock BJ, Partin AW, *et al.* The impact of preoperative erectile dysfunction on survival after radical prostatectomy. *BJU Int* 2010;106(11):1612-7.
22. Di Bella CM, Howard LE, Oyekunle T, *et al.* Abdominal and pelvic adipose tissue distribution and risk of prostate cancer recurrence after radiation therapy. *Prostate* 2020.
23. Heo JE, Ahn HK, Kim J, *et al.* Changes in Clinical Characteristics of Patients with an Initial Diagnosis of Prostate Cancer in Korea: 10-Year Trends Reported by a Tertiary Center. *J Korean Med Sci* 2018;33(6):e42.
24. Rudman SM, Gray KP, Batista JL, *et al.* Risk of prostate cancer-specific death in men with baseline metabolic aberrations treated with androgen deprivation therapy for biochemical recurrence. *BJU Int* 2016;118(6):919-26.
25. Antoun S, Bayar A, Ileana E, *et al.* High subcutaneous adipose tissue predicts the prognosis in metastatic castration-resistant prostate cancer patients in post chemotherapy setting. *Eur J Cancer* 2015;51(17):2570-7.
26. Hu MB, Yang T, Hu JM, *et al.* Prognostic factors in Chinese patients with prostate cancer receiving primary androgen deprivation therapy: validation of Japan Cancer of the Prostate Risk Assessment (J-CAPRA) score and impacts of pre-existing obesity and diabetes mellitus. *Int J Clin Oncol* 2018;23(3):591-8.
27. Greenlee H, Unger JM, LeBlanc M, *et al.* Association between body mass index and cancer survival in a pooled analysis of 22 clinical trials. *Cancer Epidemiology Biomarkers and Prevention* 2017;26(1):21-9.
28. Lee J, Park JS, Heo JE, *et al.* Muscle Characteristics Obtained Using Computed Tomography as Prognosticators in Patients with Castration-Resistant Prostate Cancer. *Cancers (Basel)* 2020;12(7).
29. Pan J, Wang J, Wei Y, *et al.* Combination of body mass index and albumin predicts the survival in metastatic castration-resistant prostate cancer patients treated with abiraterone: A post hoc analysis of two randomized trials. *Cancer Med* 2021;10(19):6697-704.
30. Delouya G, Tiberi D, Bhatnagar SR, *et al.* Impact of adipose tissue on prostate cancer aggressiveness - analysis of a high-risk population. *Horm Mol Biol Clin Investig* 2018;36(3).
31. Tomaszewski JJ, Chen YF, Bertolet M, *et al.* Obesity is not associated with aggressive pathologic features or biochemical recurrence after radical prostatectomy. *Urology* 2013;81(5):992-6.
32. Kim H, Kalchman I, Santiago-Jiménez M, *et al.* Transcriptome evaluation of the relation between body mass index and prostate cancer outcomes. *Cancer* 2017;123(12):2240-7.
33. Palma D, Pickles T, Tyldesley S. Obesity as a predictor of biochemical recurrence and survival after radiation therapy for prostate cancer. *BJU Int* 2007;100(2):315-9.
34. Merrick GS, Galbreath RW, Butler WM, *et al.* Obesity is not predictive of overall survival following permanent prostate brachytherapy. *Am J Clin Oncol* 2007;30(6):588-96.
35. Fang LC, Merrick GS, Butler WM, *et al.* High-risk prostate cancer with Gleason score 8-10 and PSA level  $\leq 15$  ng/mL treated with permanent interstitial brachytherapy. *Int J Radiat Oncol Biol Phys* 2011;81(4):992-6.
36. Taira AV, Merrick GS, Butler WM, *et al.* Long-term outcome for clinically localized prostate cancer treated with permanent interstitial brachytherapy. *Int J Radiat Oncol Biol Phys* 2011;79(5):1336-42.
37. Taira AV, Merrick GS, Galbreath RW, *et al.* Factors impacting all-cause mortality in prostate cancer brachytherapy patients with or without androgen deprivation therapy. *Brachytherapy* 2010;9(1):42-9.
38. Taira AV, Merrick GS, Galbreath RW, *et al.* Prognostic importance of small prostate size in men receiving definitive prostate brachytherapy. *Int J Radiat Oncol Biol Phys* 2012;84(2):396-401.



39. Merrick GS, Galbreath R, Fiano R, *et al.* The Impact of Body Mass Index on Freedom From Therapeutic Intervention and Quality of Life in Active Surveillance Prostate Cancer Patients. *Am J Clin Oncol* 2021;44(8):429-33.
40. Tu H, McQuade JL, Davies MA, *et al.* Body mass index and survival after cancer diagnosis: A pan-cancer cohort study of 114 430 patients with cancer. *Innovation (Camb)* 2022;3(6):100344.
41. Chalfin HJ, Lee SB, Jeong BC, *et al.* Obesity and long-term survival after radical prostatectomy. *J Urol* 2014;192(4):1100-4.
42. Montgomery RB, Goldman B, Tangen CM, *et al.* Association of body mass index with response and survival in men with metastatic prostate cancer: Southwest Oncology Group trials 8894 and 9916. *J Urol* 2007;178(5):1946-51; discussion 51.
43. Wu W, Liu X, Chaftari P, *et al.* Association of body composition with outcome of docetaxel chemotherapy in metastatic prostate cancer: a retrospective review. *PLoS One* 2015;10(3):e0122047.
44. Halabi S, Ou SS, Vogelzang NJ, *et al.* Inverse correlation between body mass index and clinical outcomes in men with advanced castration-recurrent prostate cancer. *Cancer* 2007;110(7):1478-84.
45. Geinitz H, Thamm R, Mueller T, *et al.* Impact of body mass index on outcomes after conformal radiotherapy in patients with prostate cancer. *Int J Radiat Oncol Biol Phys* 2011;81(1):16-22.
46. Mason RJ, Boorjian SA, Bhindi B, *et al.* Examining the association between adiposity and biochemical recurrence after radical prostatectomy. *Canadian Urological Association Journal* 2018;12(7):E331-E7.
47. Xu MC, Huelster HL, Hatcher JB, *et al.* Obesity is Associated with Longer Survival Independent of Sarcopenia and Myosteatosis in Metastatic and/or Castrate-Resistant Prostate Cancer. *J Urol* 2020.
48. Stangl-Kremser J, Suarez-Ibarrola R, Andrea D, *et al.* Assessment of body composition in the advanced stage of castration-resistant prostate cancer: special focus on sarcopenia. *Prostate Cancer Prostatic Dis* 2020;23(2):309-15.
49. Wang LS, Murphy CT, Ruth K, *et al.* Impact of obesity on outcomes after definitive dose-escalated intensity-modulated radiotherapy for localized prostate cancer. *Cancer* 2015;121(17):3010-7.
50. Siddiqui SA, Inman BA, Sengupta S, *et al.* Obesity and survival after radical prostatectomy: A 10-year prospective cohort study. *Cancer* 2006;107(3):521-9.
51. Ikeda T, Ishihara H, Iizuka J, *et al.* Prognostic impact of sarcopenia in patients with metastatic hormone-sensitive prostate cancer. *Jpn J Clin Oncol* 2020;50(8):933-9.
52. Kashiwagi E, Shiota M, Masaoka H, *et al.* Relationship between body composition and hormone sensitivity for androgen deprivation therapy in patients with metastatic prostate cancer. *Prostate Int* 2020;8(1):22-6.
53. Jeong BC, Chalfin HJ, Lee SB, *et al.* The relationship between the extent of extraprostatic extension and survival following radical prostatectomy. *Eur Urol* 2015;67(2):342-6.
54. Abdel-Rahman O. Impact of Diabetes on the Outcomes of Patients With Castration-resistant Prostate Cancer Treated With Docetaxel: A Pooled Analysis of Three Phase III Studies. *Clin Genitourin Cancer* 2019;17(1):e104-e12.
55. Froehner M, Kellner AE, Koch R, *et al.* A combined index to classify prognostic comorbidity in candidates for radical prostatectomy. *BMC Urol* 2014;14:28.
56. Cantarutti A, Bonn SE, Adami HO, *et al.* Body mass index and mortality in men with prostate cancer. *Prostate* 2015;75(11):1129-36.
57. Møller H, Roswall N, Van Hemelrijck M, *et al.* Prostate cancer incidence, clinical stage and survival in relation to obesity: a prospective cohort study in Denmark. *Int J Cancer* 2015;136(8):1940-7.
58. Ma J, Li H, Giovannucci E, *et al.* Prediagnostic body-mass index, plasma C-peptide concentration, and prostate cancer-specific mortality in men with prostate cancer: a long-term survival analysis. *Lancet Oncol* 2008;9(11):1039-47.
59. Aarestrup J, Gamborg M, Cook MB, *et al.* Childhood height increases the risk of prostate cancer mortality. *Eur J Cancer* 2015;51(10):1340-5.
60. Gong Z, Agalliu I, Lin DW, *et al.* Obesity is associated with increased risks of prostate cancer metastasis and death after initial cancer diagnosis in middle-aged men. *Cancer* 2007;109(6):1192-202.
61. Vidal AC, Howard LE, Sun SX, *et al.* Obesity and prostate cancer-specific mortality after radical prostatectomy: results from the Shared Equal Access Regional Cancer Hospital (SEARCH) database. *Prostate Cancer Prostatic Dis* 2017;20(1):72-8.
62. Vidal AC, Howard LE, de Hoedt A, *et al.* Obese patients with castration-resistant prostate cancer may be at a lower risk of all-cause mortality: results from the Shared Equal Access Regional Cancer Hospital (SEARCH) database. *BJU Int* 2018;122(1):76-82.

63. Vidal AC, Oyekunle T, Howard LE, *et al.* Obesity, race, and long-term prostate cancer outcomes. *Cancer* 2020;126(16):3733-41.
64. Keto CJ, Aronson WJ, Terris MK, *et al.* Obesity is associated with castration-resistant disease and metastasis in men treated with androgen deprivation therapy after radical prostatectomy: results from the SEARCH database. *BJU Int* 2012;110(4):492-8.
65. Koo KC, Park SU, Kim KH, *et al.* Prognostic Impacts of Metastatic Site and Pain on Progression to Castrate Resistance and Mortality in Patients with Metastatic Prostate Cancer. *Yonsei Med J* 2015;56(5):1206-12.
66. Lee JS, Lee HS, Ha JS, *et al.* Subcutaneous Fat Distribution is a Prognostic Biomarker for Men with Castration Resistant Prostate Cancer. *J Urol* 2018;200(1):114-20.
67. McDonald AM, Fiveash JB, Kirkland RS, *et al.* Subcutaneous adipose tissue characteristics and the risk of biochemical recurrence in men with high-risk prostate cancer. *Urol Oncol* 2017;35(11):663.e15-.e21.
68. Chiang PK, Tsai WK, Chiu AW, *et al.* Muscle Loss During Androgen Deprivation Therapy Is Associated With Higher Risk of Non-Cancer Mortality in High-Risk Prostate Cancer. *Front Oncol* 2021;11:722652.
69. Meyer F, Bairati I, Shadmani R, *et al.* Dietary fat and prostate cancer survival. *Cancer Causes Control* 1999;10(4):245-51.
70. Bluethmann SM, Wang M, Wasserman E, *et al.* Prostate cancer in Pennsylvania: The role of older age at diagnosis, aggressiveness, and environmental risk factors on treatment and mortality using data from the Pennsylvania Cancer Registry. *Cancer Med* 2020;9(10):3623-33.
71. Huang J, Weinstein SJ, Moore SC, *et al.* Pre-diagnostic Serum Metabolomic Profiling of Prostate Cancer Survival. *J Gerontol A Biol Sci Med Sci* 2019;74(6):853-9.
72. Yu YD, Byun SS, Lee SE, *et al.* Impact of Body Mass Index on Oncological Outcomes of Prostate Cancer Patients after Radical Prostatectomy. *Sci Rep* 2018;8(1):11962.

| <b>Supplementary Table 5 Hazard ratios (95% CI) for non-linear analysis of post-diagnosis BMI and all-cause mortality</b> |                                                                                |             |             |                                                                                      |             |             |
|---------------------------------------------------------------------------------------------------------------------------|--------------------------------------------------------------------------------|-------------|-------------|--------------------------------------------------------------------------------------|-------------|-------------|
|                                                                                                                           | <b>Values from midpoint estimation for open ended categories</b>               |             |             | <b>Values using common midpoint values from literature for open ended categories</b> |             |             |
| <b>BMI<br/>kg/m<sup>2</sup></b>                                                                                           | <b>HR 95% CI</b>                                                               |             |             | <b>HR 95% CI</b>                                                                     |             |             |
| 17                                                                                                                        | 1.23                                                                           | 1.07        | 1.41        | 1.33                                                                                 | 1.13        | 1.57        |
| 18                                                                                                                        | 1.20                                                                           | 1.06        | 1.35        | 1.28                                                                                 | 1.11        | 1.48        |
| 19                                                                                                                        | 1.17                                                                           | 1.05        | 1.30        | 1.24                                                                                 | 1.09        | 1.41        |
| 20                                                                                                                        | 1.14                                                                           | 1.04        | 1.25        | 1.20                                                                                 | 1.08        | 1.34        |
| 21                                                                                                                        | 1.11                                                                           | 1.03        | 1.20        | 1.16                                                                                 | 1.06        | 1.27        |
| 22                                                                                                                        | 1.09                                                                           | 1.02        | 1.15        | 1.12                                                                                 | 1.05        | 1.20        |
| 23                                                                                                                        | 1.06                                                                           | 1.01        | 1.11        | 1.08                                                                                 | 1.03        | 1.14        |
| 24                                                                                                                        | 1.03                                                                           | 1.01        | 1.06        | 1.05                                                                                 | 1.02        | 1.08        |
| 25                                                                                                                        | 1.01                                                                           | 1.00        | 1.03        | 1.02                                                                                 | 1.01        | 1.04        |
| <b>26 (ref)</b>                                                                                                           | <b>1.00</b>                                                                    | <b>1.00</b> | <b>1.00</b> | <b>1.00</b>                                                                          | <b>1.00</b> | <b>1.00</b> |
| 27                                                                                                                        | 0.99                                                                           | 0.98        | 1.01        | 0.99                                                                                 | 0.97        | 1.00        |
| 28                                                                                                                        | 1.00                                                                           | 0.97        | 1.03        | 0.99                                                                                 | 0.96        | 1.01        |
| 29                                                                                                                        | 1.01                                                                           | 0.97        | 1.06        | 1.00                                                                                 | 0.96        | 1.04        |
| 30                                                                                                                        | 1.04                                                                           | 0.97        | 1.10        | 1.02                                                                                 | 0.96        | 1.07        |
| 31                                                                                                                        | 1.07                                                                           | 0.98        | 1.15        | 1.04                                                                                 | 0.97        | 1.12        |
| 32                                                                                                                        | 1.10                                                                           | 0.99        | 1.22        | 1.08                                                                                 | 0.98        | 1.18        |
| 33                                                                                                                        | 1.14                                                                           | 1.01        | 1.28        | 1.11                                                                                 | 0.99        | 1.25        |
| 34                                                                                                                        | 1.17                                                                           | 1.02        | 1.36        | 1.15                                                                                 | 1.01        | 1.32        |
| 35                                                                                                                        | 1.21                                                                           | 1.03        | 1.43        | 1.19                                                                                 | 1.02        | 1.40        |
| 36                                                                                                                        | 1.25                                                                           | 1.04        | 1.51        | 1.24                                                                                 | 1.03        | 1.49        |
| 37                                                                                                                        | 1.30                                                                           | 1.05        | 1.60        | 1.28                                                                                 | 1.04        | 1.58        |
| 38                                                                                                                        | 1.34                                                                           | 1.06        | 1.69        | 1.33                                                                                 | 1.05        | 1.67        |
| 39                                                                                                                        | 1.39                                                                           | 1.08        | 1.78        | 1.37                                                                                 | 1.06        | 1.77        |
| 40                                                                                                                        | 1.43                                                                           | 1.09        | 1.88        | 1.42                                                                                 | 1.07        | 1.88        |
| Wald Test                                                                                                                 | Chi-squared test:<br>X <sup>2</sup> = 23, df = 2, P(>X <sup>2</sup> ) = <0.001 |             |             | Chi-squared test:<br>X <sup>2</sup> = 15.5, df = 2, P(>X <sup>2</sup> ) = < 0.001    |             |             |
| I-square statistic                                                                                                        | 64%                                                                            |             |             | 65%                                                                                  |             |             |

| <b>Supplementary Table 6 Categorical meta-analyses of BMI and mortality outcomes, summary of main results</b>                                                             |           |                                                                         |                                          |                                        |                              |              |                     |                                    |             |
|---------------------------------------------------------------------------------------------------------------------------------------------------------------------------|-----------|-------------------------------------------------------------------------|------------------------------------------|----------------------------------------|------------------------------|--------------|---------------------|------------------------------------|-------------|
|                                                                                                                                                                           |           |                                                                         |                                          |                                        | Heterogeneity                |              |                     | Small study effects                | Tau-squared |
|                                                                                                                                                                           | N studies | N deaths/<br>N total men                                                | Summary HR<br>(95% CI)<br>Random effects | Summary HR<br>(95% CI)<br>Fixed effect | I <sup>2</sup> %<br>(95% CI) | 95% PI       | Q value,<br>p-value | Egger's<br>p-value<br>(studies>10) |             |
| <b>All-cause mortality</b>                                                                                                                                                |           |                                                                         |                                          |                                        |                              |              |                     |                                    |             |
| Overweight versus normal weight (i.e., 25 to 30 vs <25 or 25 to 30 vs 18.5 to 25) <sup>‡</sup>                                                                            | 19        | <u>Overweight:</u><br>4413/20582<br><u>Normal weight:</u><br>3321/12583 | 0.89 (0.82 to 0.95)                      | 0.92 (0.88 to 0.97)                    | 47 (9 to 69)                 | 0.70 to 1.11 | 34, 0.01            | 0.04                               | 0.01        |
| Obese versus normal weight (i.e., ≥30 vs <25 or ≥30 vs 18.5 to 25) <sup>‡</sup>                                                                                           | 18        | <u>Obese:</u><br>2177/7072<br><u>Normal weight:</u><br>3321/9461        | 0.94 (0.83 to 1.08)                      | 1.00 (0.94 to 1.06)                    | 73 (56 to 83)                | 0.58 to 1.55 | 62, <0.01           | 0.26                               | 0.05        |
| <b>Prostate cancer-specific mortality</b>                                                                                                                                 |           |                                                                         |                                          |                                        |                              |              |                     |                                    |             |
| Overweight versus normal weight (i.e., 25 to 30 vs <25 or 25 to 30 vs 18.5 to 25) <sup>‡</sup>                                                                            | 15        | <u>Overweight:</u><br>1022/14734<br><u>Normal weight:</u><br>775/13907  | 1.02 (0.89 to 1.17)                      | 0.98 (0.91 to 1.07)                    | 52 (14 to 74)                | 0.68 to 1.53 | 29, <0.01           | 0.27                               | 0.03        |
| Obese versus normal weight (i.e., ≥30 vs <25 or ≥30 vs 18.5 to 25)                                                                                                        | 14        | <u>Obese:</u><br>492/6376<br><u>Normal weight:</u><br>775/10785         | 1.08 (0.89 to 1.31)                      | 0.98 (0.88 to 1.09)                    | 54 (16 to 75)                | 0.61 to 1.89 | 28, <0.01           | 0.03                               | 0.06        |
| <sup>‡</sup> Number of deaths in an included publication was not given and/or could not be estimated per category. NA, not available; N, number.; PI, Prediction Interval |           |                                                                         |                                          |                                        |                              |              |                     |                                    |             |

| Supplementary Table 7 Hazard ratios (95% CI) for non-linear analysis of post-diagnosis BMI and PCa-specific mortality. |                                                                               |             |             |                                                                               |             |             |
|------------------------------------------------------------------------------------------------------------------------|-------------------------------------------------------------------------------|-------------|-------------|-------------------------------------------------------------------------------|-------------|-------------|
|                                                                                                                        | Values from midpoint estimation for open ended categories                     |             |             | Values using common midpoint values from literature for open ended categories |             |             |
| BMI<br>kg/m <sup>2</sup>                                                                                               | HR 95% CI                                                                     |             |             | HR 95% CI                                                                     |             |             |
| 17                                                                                                                     | 1.06                                                                          | 0.88        | 1.28        | 1.04                                                                          | 0.85        | 1.27        |
| 18                                                                                                                     | 1.05                                                                          | 0.89        | 1.24        | 1.03                                                                          | 0.87        | 1.23        |
| 19                                                                                                                     | 1.04                                                                          | 0.91        | 1.20        | 1.03                                                                          | 0.89        | 1.19        |
| 20                                                                                                                     | 1.03                                                                          | 0.93        | 1.15        | 1.02                                                                          | 0.91        | 1.15        |
| 21                                                                                                                     | 1.03                                                                          | 0.95        | 1.11        | 1.02                                                                          | 0.93        | 1.11        |
| 22                                                                                                                     | 1.02                                                                          | 0.96        | 1.07        | 1.01                                                                          | 0.95        | 1.07        |
| 23                                                                                                                     | 1.01                                                                          | 0.98        | 1.03        | 1.00                                                                          | 0.98        | 1.03        |
| <b>24 (ref)</b>                                                                                                        | <b>1.00</b>                                                                   | <b>1.00</b> | <b>1.00</b> | <b>1.00</b>                                                                   | <b>1.00</b> | <b>1.00</b> |
| 25                                                                                                                     | 1.00                                                                          | 0.97        | 1.02        | 1.00                                                                          | 0.97        | 1.02        |
| 26                                                                                                                     | 1.00                                                                          | 0.96        | 1.04        | 1.00                                                                          | 0.95        | 1.05        |
| 27                                                                                                                     | 1.00                                                                          | 0.95        | 1.06        | 1.00                                                                          | 0.94        | 1.07        |
| 28                                                                                                                     | 1.02                                                                          | 0.96        | 1.09        | 1.01                                                                          | 0.94        | 1.09        |
| 29                                                                                                                     | 1.05                                                                          | 0.97        | 1.14        | 1.03                                                                          | 0.95        | 1.12        |
| 30                                                                                                                     | 1.08                                                                          | 0.97        | 1.21        | 1.06                                                                          | 0.96        | 1.16        |
| 31                                                                                                                     | 1.13                                                                          | 0.97        | 1.30        | 1.09                                                                          | 0.97        | 1.22        |
| 32                                                                                                                     | 1.18                                                                          | 0.97        | 1.42        | 1.12                                                                          | 0.97        | 1.29        |
| 33                                                                                                                     | 1.23                                                                          | 0.97        | 1.55        | 1.16                                                                          | 0.97        | 1.38        |
| 34                                                                                                                     | 1.28                                                                          | 0.96        | 1.70        | 1.19                                                                          | 0.96        | 1.48        |
| 35                                                                                                                     | 1.34                                                                          | 0.96        | 1.87        | 1.23                                                                          | 0.96        | 1.58        |
| 36                                                                                                                     | 1.40                                                                          | 0.95        | 2.05        | 1.27                                                                          | 0.95        | 1.70        |
| 37                                                                                                                     | 1.46                                                                          | 0.95        | 2.25        | 1.31                                                                          | 0.94        | 1.83        |
| 38                                                                                                                     | 1.52                                                                          | 0.94        | 2.47        | 1.35                                                                          | 0.93        | 1.96        |
| 39                                                                                                                     | 1.59                                                                          | 0.93        | 2.71        | 1.40                                                                          | 0.93        | 2.11        |
| 40                                                                                                                     | 1.66                                                                          | 0.93        | 2.97        | 1.44                                                                          | 0.92        | 2.27        |
| Wald Test                                                                                                              | Chi-squared test:<br>X <sup>2</sup> = 2.9, df = 2, P(>X <sup>2</sup> ) = 0.23 |             |             | Chi-squared test:<br>X <sup>2</sup> = 2.6, df = 2, P(>X <sup>2</sup> ) = 0.27 |             |             |
| I-square statistic                                                                                                     | 50%                                                                           |             |             | 48%                                                                           |             |             |

| <b>Supplementary Table 8 Linear dose-response subgroup meta-analyses of BMI (per 5 kg/m<sup>2</sup>) and all-cause mortality.</b>                                             |           |                          |                                          |                                        |                             |              |                  |                     |                                            |                                            |
|-------------------------------------------------------------------------------------------------------------------------------------------------------------------------------|-----------|--------------------------|------------------------------------------|----------------------------------------|-----------------------------|--------------|------------------|---------------------|--------------------------------------------|--------------------------------------------|
|                                                                                                                                                                               | N studies | N deaths/<br>N total men | Summary HR<br>(95% CI)<br>Random effects | Summary HR<br>(95% CI)<br>Fixed effect | I <sup>2</sup> %<br>(95%CI) | 95% PI       | Tau <sup>2</sup> | Q value,<br>p-value | Q value,<br>p-value<br>across<br>subgroups | Egger's<br>p-value<br>(When<br>studies>10) |
| <i>Excluded or included low/underweight men</i>                                                                                                                               |           |                          |                                          |                                        |                             |              |                  |                     | 0.14, 0.71                                 |                                            |
| Included them¥                                                                                                                                                                | 22        | 9367/49539               | 0.99 (0.93 to 1.06)                      | 1.00 (0.97 to 1.03)                    | 74 (61 to 83)               | 0.77 to 1.29 | 0.01             | 82, <0.01           |                                            | 0.64                                       |
| Excluded (or provided an estimate but we could exclude it in sensitivity analysis)                                                                                            | 5         | 6003/12963               | 0.96 (0.83 to 1.12)                      | 1.04 (1.00 to 1.08)                    | 87 (71 to 94)               | 0.56 to 1.65 | 0.02             | 30, <0.01           |                                            | -                                          |
| <i>By study design</i>                                                                                                                                                        |           |                          |                                          |                                        |                             |              |                  |                     | 1.27, 0.26                                 |                                            |
| Prospective cohort (includes prospective cohorts and follow-up of cases from a non-cancer cohort)                                                                             | 5         | 6483/22366               | 1.03 (0.96 to 1.09)                      | 1.05 (1.01 to 1.09)                    | 47 (0 to 81)                | 0.85 to 1.23 | <0.01            | 7.5, 0.11           |                                            | -                                          |
| Retrospective cohort (includes retrospective cohorts, follow-up of cases from case-control and post-hoc trial analysis/secondary analysis)                                    | 20        | 7328/36208               | 0.97 (0.89 to 1.05)                      | 0.99 (0.96 to 1.02)                    | 79 (68 to 86)               | 0.70 to 1.33 | 0.02             | 89, <0.01           |                                            | 0.37                                       |
| <i>By median deaths (events)</i>                                                                                                                                              |           |                          |                                          |                                        |                             |              |                  |                     | 0.02, 0.89                                 |                                            |
| Less than median deaths n<306                                                                                                                                                 | 12        | 1693/8388                | 0.98 (0.86 to 1.11)                      | 1.04 (0.97 to 1.12)                    | 66 (38 to 82)               | 0.65 to 1.49 | 0.03             | 33, <0.01           |                                            | 0.02                                       |
| More than median deaths n>306                                                                                                                                                 | 12        | 12118/48586              | 0.99 (0.92 to 1.06)                      | 1.02 (0.99 to 1.05)                    | 83 (72 to 90)               | 0.77 to 1.27 | 0.01             | 64, <0.01           |                                            | 0.16                                       |
| <i>Anthropometry assessment</i>                                                                                                                                               |           |                          |                                          |                                        |                             |              |                  |                     | 3.64, 0.16                                 |                                            |
| Self-reported                                                                                                                                                                 | 6         | 6549/23202               | 1.05 (1.00 to 1.11)                      | 1.06 (1.02 to 1.10)                    | 22 (0 to 66)                | 0.94 to 1.17 | <0.01            | 6, 0.27             |                                            | -                                          |
| Measured                                                                                                                                                                      | 9         | 4197/11838               | 0.96 (0.87 to 1.06)                      | 0.99 (0.94 to 1.03)                    | 73 (47 to 86)               | 0.70 to 1.31 | 0.01             | 30, <0.01           |                                            | -                                          |
| Medical records¥                                                                                                                                                              | 10        | 3065/23534               | 0.96 (0.84 to 1.09)                      | 0.98 (0.94 to 1.02)                    | 84 (73 to 91)               | 0.62 to 1.49 | 0.03             | 57, <0.01           |                                            | 0.74                                       |
| <i>Follow-up time</i><br>*Two studies provided maximum follow-up, so they were not used in analysis and in one median follow-up was unclear so not included in this analysis. |           |                          |                                          |                                        |                             |              |                  |                     | 0.03, 0.85                                 |                                            |
| More than 10 median years                                                                                                                                                     | 5         | 2089/7733                | 0.99 (0.92 to 1.06)                      | 0.99 (0.92 to 1.06)                    | 0 (NA)                      | 0.89 to 1.10 | 0                | 0.6, 0.96           |                                            | -                                          |
| Less than 10 median years¥                                                                                                                                                    | 17        | 9973/46472               | 0.98 (0.90 to 1.06)                      | 1.02 (0.99 to 1.05)                    | 84 (76 to 90)               | 0.71 to 1.35 | 0.02             | 101, <0.01          |                                            | 0.24                                       |
| <i>Geographic Location</i>                                                                                                                                                    |           |                          |                                          |                                        |                             |              |                  |                     | <b>11, 0.03</b>                            |                                            |
| North America/Caribbean                                                                                                                                                       | 10        | 9373/41154               | 1.00 (0.92 to 1.09)                      | 1.03 (1.01 to 1.06)                    | 85 (74 to 91)               | 0.75 to 1.33 | 0.01             | 59, <0.01           |                                            | 0.35                                       |

|                                                                                                                                                                                                                                  |    |             |                     |                     |               |              |       |            |                     |      |
|----------------------------------------------------------------------------------------------------------------------------------------------------------------------------------------------------------------------------------|----|-------------|---------------------|---------------------|---------------|--------------|-------|------------|---------------------|------|
| (USA, Canada, Jamaica)                                                                                                                                                                                                           |    |             |                     |                     |               |              |       |            |                     |      |
| Oceania (Australia)                                                                                                                                                                                                              | 1  | 193/572     | 0.99 (0.81 to 1.22) | -                   | -             | -            | -     | -          | -                   | -    |
| Europe (Austria, Italy, Sweden, Germany, Netherlands)                                                                                                                                                                            | 7  | 2133/11493  | 1.08 (0.97 to 1.21) | 1.07 (1.00 to 1.15) | 46 (0 to 77)  | 0.81 to 1.44 | <0.01 | 11, 0.08   |                     | -    |
| Multinational (Europe/USA/Multicountry) ¥                                                                                                                                                                                        | 5  | 1972/4980   | 0.90 (0.81 to 1.00) | 0.91 (0.86 to 0.97) | 64 (6 to 86)  | 0.63 to 1.27 | <0.01 | 11, 0.02   |                     | -    |
| East Asia (Japan)                                                                                                                                                                                                                | 2  | 140/375     | 0.70 (0.52 to 0.95) | 0.70 (0.52 to 0.95) | 0 (NA)        | -            | 0     | 0.2, 0.68  |                     | -    |
| <i>Tumour risk stratification</i>                                                                                                                                                                                                |    |             |                     |                     |               |              |       |            | <b>26, &lt;0.01</b> |      |
| Group one: Low risk/Early stage                                                                                                                                                                                                  | 1  | 3026/6749   | 1.10 (1.04 to 1.15) | -                   | -             | -            | -     | -          |                     | -    |
| Group two: Mixed PCa i.e., low, intermediate, or high risk and maybe metastatic (or unknown if includes metastatic but could)                                                                                                    | 3  | 1339/4384   | 1.01 (0.92 to 1.10) | 1.01 (0.92 to 1.10) | 0 (NA)        | 0.57 to 1.78 | 0     | 0.04, 0.98 |                     | -    |
| Group three: Mixed PCa i.e., low, intermediate/high risk but they state (or give info) that they excluded distant metastatic (M0) or state that PCa was clinically localised but could be high risk [e.g., if Gleason score>8]). | 10 | 8320/45658  | 1.10 (1.03 to 1.17) | 1.09 (1.06 to 1.13) | 60 (10 to 80) | 0.92 to 1.31 | <0.01 | 22, 0.01   |                     | 0.64 |
| Group four: Advanced/High risk PCa (could include metastatic) ¥                                                                                                                                                                  | 13 | 4858/9871   | 0.90 (0.84 to 0.96) | 0.92 (0.88 to 0.95) | 63 (33 to 80) | 0.72 to 1.12 | <0.01 | 33, <0.01  |                     | 0.16 |
| <i>Adjustment for confounding factors grouped in levels</i>                                                                                                                                                                      |    |             |                     |                     |               |              |       |            | 2.3, 0.68           |      |
| Level one: At least for age, stage, and grade (clinical risk/state)                                                                                                                                                              | 15 | 10156/46653 | 1.04 (0.96 to 1.12) | 1.04 (1.02 to 1.07) | 79 (67 to 87) | 0.80 to 1.35 | 0.01  | 68, <0.01  |                     | 0.72 |
| Level two: At least for age, stage and/or grade (clinical risk/state) and treatment (any)                                                                                                                                        | 20 | 12175/50179 | 0.99 (0.93 to 1.05) | 1.02 (0.99 to 1.04) | 78 (67 to 86) | 0.77 to 1.27 | 0.01  | 87, <0.01  |                     | 0.18 |
| Level three: At least for age, stage, grade (clinical risk/state) and treatment (any)                                                                                                                                            | 13 | 9775/44325  | 1.03 (0.96 to 1.11) | 1.04 (1.01 to 1.07) | 80 (66 to 88) | 0.80 to 1.33 | 0.01  | 59, <0.01  |                     | 0.68 |
| Level four: At least for age, stage, grade (clinical risk/state), treatment (any) and smoking                                                                                                                                    | 3  | 4694/12373  | 1.07 (0.97 to 1.17) | 1.07 (1.03 to 1.12) | 52 (0 to 86)  | 0.41 to 2.74 | <0.01 | 4, 0.12    |                     | -    |
| Level five: At least for age, stage, grade, treatment (any),                                                                                                                                                                     | 2  | 839/4043    | 1.06 (0.86 to 1.31) | 1.04 (0.93 to 1.15) | 73 (0 to 94)  | -            | 0.02  | 4, 0.06    |                     | -    |

|                                                                                                                                     |                  |    |             |                     |                     |               |              |       |            |                       |      |
|-------------------------------------------------------------------------------------------------------------------------------------|------------------|----|-------------|---------------------|---------------------|---------------|--------------|-------|------------|-----------------------|------|
| smoking and PSA test (PSA levels [baseline/at-around diagnosis] as proxy)                                                           |                  |    |             |                     |                     |               |              |       |            |                       |      |
| Adjustment for individual confounding factors (Even if accounted for in univariate analysis or using a specific p-value as cut-off) |                  |    |             |                     |                     |               |              |       |            | 25, 0.01              |      |
|                                                                                                                                     |                  |    |             |                     |                     |               |              |       |            | 0.6, 0.43             |      |
| Accounted for age                                                                                                                   | No               | 2  | 1767/6319   | 1.02 (0.94 to 1.09) | 1.02 (0.94 to 1.09) | 0 (NA)        | -            | 0     | 0.18, 0.67 |                       | -    |
|                                                                                                                                     | Yes <sup>‡</sup> | 23 | 12044/52255 | 0.98 (0.92 to 1.05) | 1.02 (0.99 to 1.04) | 79 (68 to 86) | 0.75 to 1.28 | 0.02  | 103, <0.01 |                       | 0.15 |
|                                                                                                                                     |                  |    |             |                     |                     |               |              |       |            | 0.15, 0.70            |      |
| Accounted for stage (clinical and/or pathological/risk classification/tumour extent)                                                | No               | 4  | 2561/6904   | 1.00 (0.92 to 1.08) | 1.00 (0.92 to 1.08) | 0 (NA)        | 0.84 to 1.18 | 0     | 0.43, 0.93 |                       | -    |
|                                                                                                                                     | Yes              | 21 | 12250/51670 | 0.98 (0.92 to 1.05) | 1.02 (0.99 to 1.04) | 80 (71 to 84) | 0.75 to 1.29 | 0.02  | 102, <0.01 |                       | 0.17 |
|                                                                                                                                     |                  |    |             |                     |                     |               |              |       |            | <b>18.9, &lt;0.01</b> |      |
| Accounted for Gleason score                                                                                                         | No               | 5  | 1294/4011   | 0.83 (0.77 to 0.90) | 0.83 (0.77 to 0.90) | 7 (0 to 81)   | 0.71 to 0.97 | <0.01 | 4, 0.36    |                       | -    |
|                                                                                                                                     | Yes              | 20 | 12517/54563 | 1.03 (0.97 to 1.09) | 1.04 (1.01 to 1.06) | 73 (57 to 82) | 0.83 to 1.28 | <0.01 | 69, <0.01  |                       | 0.54 |
|                                                                                                                                     |                  |    |             |                     |                     |               |              |       |            | 0.1, 0.74             |      |
| Accounted for treatment/s (any)                                                                                                     | No               | 4  | 682/3071    | 0.94 (0.70 to 1.27) | 0.99 (0.87 to 1.13) | 80 (46 to 92) | 0.25 to 3.55 | 0.07  | 15, <0.01  |                       | -    |
|                                                                                                                                     | Yes              | 21 | 13129/55503 | 0.99 (0.93 to 1.05) | 1.02 (0.99 to 1.04) | 77 (66 to 85) | 0.78 to 1.25 | 0.01  | 88, <0.01  |                       | 0.16 |
|                                                                                                                                     |                  |    |             |                     |                     |               |              |       |            | 2.3, 0.13             |      |
| Accounted for smoking                                                                                                               | No               | 20 | 8786/45390  | 0.97 (0.90 to 1.04) | 0.99 (0.96 to 1.02) | 78 (67 to 86) | 0.73 to 1.29 | 0.02  | 87, <0.01  |                       | 0.42 |
|                                                                                                                                     | Yes              | 5  | 5025/13184  | 1.05 (0.98 to 1.13) | 1.07 (1.03 to 1.11) | 31 (0 to 73)  | 0.87 to 1.27 | <0.01 | 6, 0.22    |                       | -    |
|                                                                                                                                     |                  |    |             |                     |                     |               |              |       |            | 0, 1.00               |      |
| Accounted for PSA test/PSA levels                                                                                                   | No               | 8  | 5996/14109  | 0.99 (0.92 to 1.07) | 1.05 (1.01 to 1.09) | 49 (0 to 77)  | 0.81 to 1.21 | <0.01 | 14, 0.05   |                       | -    |
|                                                                                                                                     | Yes              | 17 | 7815/44465  | 0.99 (0.92 to 1.07) | 0.99 (0.96 to 1.02) | 81 (70 to 88) | 0.73 to 1.35 | 0.02  | 84, <0.01  |                       | 0.86 |

<sup>‡</sup>Number of deaths in an included publication was not given and/or could not be estimated. NA, not available; PI, prediction interval; n=studies



| <b>Supplementary Table 9 Linear dose-response subgroup meta-analyses of BMI (per 5 kg/m<sup>2</sup>) and PCa-specific mortality.</b>        |           |                                    |                                    |                                  |                           |              |                  |                  |                                   |                                   |
|---------------------------------------------------------------------------------------------------------------------------------------------|-----------|------------------------------------|------------------------------------|----------------------------------|---------------------------|--------------|------------------|------------------|-----------------------------------|-----------------------------------|
|                                                                                                                                             | N studies | N studies, (N deaths/ N total men) | Summary HR (95% CI) Random effects | Summary HR (95% CI) Fixed effect | I <sup>2</sup> % (95% CI) | 95% PI       | Tau <sup>2</sup> | Q value, p-value | Q value, p-value across subgroups | Egger's p-value (When studies>10) |
| <i>Excluded or included underweight</i>                                                                                                     |           |                                    |                                    |                                  |                           |              |                  |                  | 1.1, 0.29                         |                                   |
| Included them <sup>¥</sup>                                                                                                                  | 14        | 2857/46888                         | 1.08 (0.99 to 1.19)                | 1.04 (0.99 to 1.10)              | 57 (23 to 77)             | 0.82 to 1.43 | 0.01             | 31, <0.01        |                                   | 0.13                              |
| Excluded (or provided an estimate but we could exclude it in sensitivity analysis)                                                          | 3         | 1136/11305                         | 1.17 (1.04 to 1.31)                | 1.17 (1.05 to 1.29)              | 9 (0 to 91)               | 0.49 to 2.78 | <0.01            | 2, 0.34          |                                   | -                                 |
| <i>By study design</i>                                                                                                                      |           |                                    |                                    |                                  |                           |              |                  |                  | 1.7, 0.20                         |                                   |
| Prospective cohort: (includes prospective cohorts and follow-up of cases from a non-cancer cohort)                                          | 5         | 1427/26904                         | 1.03 (0.95 to 1.13)                | 1.04 (0.96 to 1.12)              | 24 (0 to 69)              | 0.83 to 1.28 | <0.01            | 5, 0.26          |                                   | -                                 |
| Retrospective cohort: (includes retrospective cohorts, follow-up of cases from case-control and post-hoc trial analysis/secondary analysis) | 11        | 1985/28553                         | 1.14 (1.00 to 1.29)                | 1.07 (1.01 to 1.13)              | 63 (29 to 81)             | 0.78 to 1.65 | 0.02             | 27, <0.01        |                                   | 0.22                              |
| <i>By median deaths (events)<sup>¥</sup></i>                                                                                                |           |                                    |                                    |                                  |                           |              |                  |                  | 1.9, 0.17                         |                                   |
| Less than median deaths n<169                                                                                                               | 7         | 544/11935                          | 1.15 (1.00 to 1.31)                | 1.15 (1.00 to 1.31)              | 0 (0 to 6)                | 0.96 to 1.37 | 0                | 1.9, 0.93        |                                   | -                                 |
| More than median deaths n>=169                                                                                                              | 8         | 2868/42080                         | 1.03 (0.95 to 1.11)                | 1.03 (0.98 to 1.08)              | 54 (0 to 79)              | 0.82 to 1.28 | <0.01            | 15, 0.03         |                                   | -                                 |
| <i>Anthropometry assessment</i>                                                                                                             |           |                                    |                                    |                                  |                           |              |                  |                  | 0.3, 0.86                         |                                   |
| Self-reported                                                                                                                               | 4         | 1610/17300                         | 1.06 (1.00 to 1.13)                | 1.06 (1.00 to 1.12)              | 8 (0 to 86)               | 0.90 to 1.25 | <0.01            | 3, 0.35          |                                   | -                                 |
| Measured                                                                                                                                    | 6         | 1011/9715                          | 1.13 (0.89 to 1.42)                | 1.05 (0.95 to 1.16)              | 79 (55 to 91)             | 0.52 to 2.44 | 0.06             | 24, <0.01        |                                   | -                                 |
| Medical records                                                                                                                             | 6         | 791/28442                          | 1.05 (0.94 to 1.16)                | 1.04 (0.94 to 1.16)              | 3 (0 to 75)               | 0.89 to 1.23 | <0.01            | 5, 0.40          |                                   | -                                 |
| <i>Follow-up time</i><br>*Two studies reported maximum or minimum follow-up and not included in this analysis                               |           |                                    |                                    |                                  |                           |              |                  |                  | 0.01, 0.93                        |                                   |
| Less than 10 median years                                                                                                                   | 9         | 1835/39534                         | 1.12 (0.96 to 1.29)                | 1.07 (1.00 to 1.14)              | 72 (45 to 86)             | 0.71 to 1.76 | 0.03             | 29, <0.01        |                                   | -                                 |
| More than 10 median years                                                                                                                   | 5         | 548/7733                           | 1.11 (0.97 to 1.26)                | 1.11 (0.97 to 1.26)              | 0 (0 to 67)               | 0.90 to 1.37 | 0                | 3, 0.64          |                                   | -                                 |
| <i>Geographic Location</i>                                                                                                                  |           |                                    |                                    |                                  |                           |              |                  |                  | 10, 0.02                          |                                   |
| North America/Caribbean (i.e., USA, Canada, Jamaica)                                                                                        | 11        | 2050/46755                         | 1.11 (1.00 to 1.23)                | 1.09 (1.02 to 1.16)              | 53 (7 to 76)              | 0.83 to 1.48 | 0.01             | 21, 0.02         |                                   | 0.43                              |
| Oceania (i.e., Australia)                                                                                                                   | 1         | 76/572                             | 1.30 (0.93 to 1.83)                | -                                | -                         | -            | -                | -                |                                   | -                                 |
| Europe (i.e., Austria, Italy, Sweden, Germany, Netherlands)                                                                                 | 3         | 835/7026                           | 1.05 (0.98 to 1.13)                | 1.05 (0.98 to 1.13)              | 0 (0 to 83)               | 0.65 to 1.69 | 0                | 1.2, 0.54        |                                   | -                                 |
| Multinational (i.e., Europe/USA)                                                                                                            | 1         | 451/1104                           | 0.83 (0.70 to 0.98)                | -                                | -                         | -            | -                | -                |                                   | -                                 |
| <i>Tumour risk stratification</i>                                                                                                           |           |                                    |                                    |                                  |                           |              |                  |                  | 4, 0.27                           |                                   |
| Group one: Low risk PCa/early stage                                                                                                         | 1         | 311/6749                           | 1.24 (1.06 to 1.45)                | -                                | -                         | -            | -                | -                |                                   | -                                 |

|                                                                                                                                                                                                                                  |     |            |                     |                     |                     |               |              |           |            |      |
|----------------------------------------------------------------------------------------------------------------------------------------------------------------------------------------------------------------------------------|-----|------------|---------------------|---------------------|---------------------|---------------|--------------|-----------|------------|------|
| Group two: Mixed PCa i.e., low, intermediate, or high risk and maybe metastatic (or unknown if includes metastatic but could)                                                                                                    | 4   | 1400/28763 | 1.06 (0.99 to 1.14) | 1.06 (0.99 to 1.14) | 0 (0 to 83)         | 0.90 to 1.25  | 0            | 3, 0.44   |            | -    |
| Group three: Mixed PCa i.e., low, intermediate/high risk but they state (or give info) that they excluded distant metastatic (M0) or state that PCa was clinically localised but could be high risk [e.g., if Gleason score>8]). | 9   | 1207/23973 | 1.10 (0.98 to 1.24) | 1.08 (1.01 to 1.15) | 58 (12 to 80)       | 0.79 to 1.53  | 0.02         | 19, 0.01  |            | -    |
| Group four: Advanced/High risk PCa (could include metastatic)                                                                                                                                                                    | 4   | 974/4060   | 1.01 (0.85 to 1.21) | 0.99 (0.89 to 1.09) | 66 (1 to 88)        | 0.48 to 2.12  | 0.02         | 9, 0.03   |            | -    |
| <i>Adjustment for confounding factors grouped in levels</i>                                                                                                                                                                      |     |            |                     |                     |                     |               |              |           | 0.5, 0.97  |      |
| Level one: Age, stage, and grade (clinical risk/state)                                                                                                                                                                           | 12  | 2679/48229 | 1.10 (1.01 to 1.20) | 1.07 (1.02 to 1.13) | 51 (5 to 75)        | 0.87 to 1.39  | <0.01        | 22, 0.02  |            | 0.15 |
| Level two: Age, stage and/or grade (clinical risk/state) and treatment (any)                                                                                                                                                     | 14  | 3185/49572 | 1.07 (0.98 to 1.17) | 1.05 (1.00 to 1.10) | 58 (24 to 77)       | 0.82 to 1.40  | 0.01         | 31, <0.01 |            | 0.35 |
| Level three: Age, stage, grade (clinical risk/state) and treatment (any)*Same studies as level one                                                                                                                               | 12  | 2679/48229 | 1.10 (1.01 to 1.20) | 1.07 (1.02 to 1.13) | 51 (5 to 75)        | 0.87 to 1.39  | <0.01        | 22, 0.02  |            | 0.15 |
| Level four: Age, stage, grade (clinical risk/state), treatment (any) and smoking                                                                                                                                                 | 4   | 1152/17531 | 1.07 (0.98 to 1.17) | 1.07 (0.98 to 1.17) | 0 (0 to 78)         | 0.89 to 1.29  | 0            | 2, 0.55   |            | -    |
| Level five: Age, stage, grade, treatment (any), smoking and PSA test (PSA levels [baseline/at-around diagnosis] as proxy)                                                                                                        | 2   | 281/4043   | 1.05 (0.88 to 1.25) | 1.05 (0.88 to 1.25) | 0 (NA)              | -             | 0            | 0.1, 0.73 |            | -    |
| <i>Adjustment for individual confounding factors. (Even if accounted for in univariate analysis or using a specific p-value as cut-off)</i>                                                                                      |     |            |                     |                     |                     |               |              |           | 11, 0.43   |      |
|                                                                                                                                                                                                                                  |     |            |                     |                     |                     |               |              |           | 0.02, 0.89 |      |
| Adjusted for age                                                                                                                                                                                                                 | No  | 1          | 151/5313            | 1.10 (0.86 to 1.41) | -                   | -             | -            | -         |            | -    |
|                                                                                                                                                                                                                                  | Yes | 15         | 3261/50144          | 1.08 (0.99 to 1.18) | 1.05 (1.01 to 1.10) | 57 (23 to 76) | 0.83 to 1.40 | 0.01      | 32, <0.01  | 0.26 |
|                                                                                                                                                                                                                                  |     |            |                     |                     |                     |               |              |           | 0.2, 0.66  |      |
| Adjusted for stage (clinical and/or pathological/risk)                                                                                                                                                                           | No  | 3          | 282/6124            | 1.13 (0.94 to 1.36) | 1.13 (0.94 to 1.36) | 0 (0 to 86)   | 0.34 to 3.79 | 0         | 1.50, 0.47 | -    |
|                                                                                                                                                                                                                                  | Yes | 13         | 3130/49333          | 1.08 (0.99 to 1.18) | 1.05 (1.00 to 1.10) | 61 (28 to 79) | 0.82 to 1.42 | 0.01      | 31, <0.01  | 0.26 |

|                                                                                                                                                  |     |    |            |                     |                     |               |              |       |           |                      |      |
|--------------------------------------------------------------------------------------------------------------------------------------------------|-----|----|------------|---------------------|---------------------|---------------|--------------|-------|-----------|----------------------|------|
| classification/tumour extent))                                                                                                                   |     |    |            |                     |                     |               |              |       |           |                      |      |
|                                                                                                                                                  |     |    |            |                     |                     |               |              |       |           | <b>8.9, &lt;0.01</b> |      |
| Accounted for Gleason score                                                                                                                      | No  | 1  | 451/1104   | 0.83 (0.70 to 0.98) | 0.83 (0.70 to 0.98) | -             | -            | -     | -         |                      | -    |
|                                                                                                                                                  | Yes | 15 | 2961/54353 | 1.10 (1.02 to 1.19) | 1.08 (1.03 to 1.13) | 42 (0 to 68)  | 0.90 to 1.35 | <0.01 | 24, 0.04  |                      | 0.15 |
|                                                                                                                                                  |     |    |            |                     |                     |               |              |       |           | 1.2, 0.27            |      |
| Accounted for treatment/s (any)                                                                                                                  | No  | 1  | 76/572     | 1.30 (0.93 to 1.83) | -                   | -             | -            | -     | -         |                      | -    |
|                                                                                                                                                  | Yes | 15 | 3336/54885 | 1.07 (0.99 to 1.16) | 1.05 (1.00 to 1.10) | 55 (20 to 75) | 0.84 to 1.38 | 0.01  | 31, <0.01 |                      | 0.32 |
|                                                                                                                                                  |     |    |            |                     |                     |               |              |       |           | 0.06, 0.81           |      |
| Accounted for smoking                                                                                                                            | No  | 10 | 2129/37115 | 1.10 (0.97 to 1.25) | 1.04 (0.99 to 1.10) | 68 (39 to 84) | 0.76 to 1.60 | 0.02  | 28, <0.01 |                      | 0.25 |
|                                                                                                                                                  | Yes | 6  | 1283/18342 | 1.08 (0.99 to 1.17) | 1.08 (0.99 to 1.17) | 0 (0 to 67)   | 0.96 to 1.21 | 0     | 4, 0.58   |                      | -    |
|                                                                                                                                                  |     |    |            |                     |                     |               |              |       |           | 0.01, 0.91           |      |
| Accounted for PSA test/PSA levels                                                                                                                | No  | 7  | 1910/18899 | 1.09 (1.01 to 1.17) | 1.07 (1.02 to 1.14) | 17 (0 to 61)  | 0.95 to 1.25 | <0.01 | 7, 0.30   |                      | -    |
|                                                                                                                                                  | Yes | 9  | 1502/36558 | 1.08 (0.93 to 1.25) | 1.02 (0.94 to 1.10) | 67 (33 to 84) | 0.69 to 1.69 | 0.03  | 24, <0.01 |                      | -    |
| ¥ Number of deaths in an included publication was not given and/or could not be estimated. NA, not available; PI, prediction interval; n=studies |     |    |            |                     |                     |               |              |       |           |                      |      |

| <b>Supplementary Table 10. Regression tests for funnel plot asymmetry in meta-analyses that included more than 10 studies (Egger's and Debray's test)</b>                                                                                                                                                                                                                                                                                                                                                                                                                                                                                                  |                                |                         |
|------------------------------------------------------------------------------------------------------------------------------------------------------------------------------------------------------------------------------------------------------------------------------------------------------------------------------------------------------------------------------------------------------------------------------------------------------------------------------------------------------------------------------------------------------------------------------------------------------------------------------------------------------------|--------------------------------|-------------------------|
| Meta-analysis                                                                                                                                                                                                                                                                                                                                                                                                                                                                                                                                                                                                                                              | Test for funnel plot asymmetry |                         |
|                                                                                                                                                                                                                                                                                                                                                                                                                                                                                                                                                                                                                                                            | Egger's test, p-value          | Debray's test, p-value* |
| <b>All-cause mortality</b>                                                                                                                                                                                                                                                                                                                                                                                                                                                                                                                                                                                                                                 |                                |                         |
| Main analysis                                                                                                                                                                                                                                                                                                                                                                                                                                                                                                                                                                                                                                              | 0.13                           | 0.49                    |
| Included low/underweight men                                                                                                                                                                                                                                                                                                                                                                                                                                                                                                                                                                                                                               | 0.64                           | 0.89                    |
| Retrospective cohort                                                                                                                                                                                                                                                                                                                                                                                                                                                                                                                                                                                                                                       | 0.37                           | 0.71                    |
| Less than median deaths                                                                                                                                                                                                                                                                                                                                                                                                                                                                                                                                                                                                                                    | <b>0.02</b>                    | 0.18                    |
| More than median deaths                                                                                                                                                                                                                                                                                                                                                                                                                                                                                                                                                                                                                                    | 0.16                           | 0.18                    |
| Follow-up less than 10 years                                                                                                                                                                                                                                                                                                                                                                                                                                                                                                                                                                                                                               | 0.24                           | 0.66                    |
| Geographic location: North America/Caribbean (USA, Canada, Jamaica)                                                                                                                                                                                                                                                                                                                                                                                                                                                                                                                                                                                        | 0.35                           | 0.91                    |
| Tumour risk classification: Group four                                                                                                                                                                                                                                                                                                                                                                                                                                                                                                                                                                                                                     | 0.16                           | 0.23                    |
| Adjustment for confounding factors grouped in levels: Level one                                                                                                                                                                                                                                                                                                                                                                                                                                                                                                                                                                                            | 0.72                           | 0.93                    |
| Adjustment for confounding factors grouped in levels: Level two                                                                                                                                                                                                                                                                                                                                                                                                                                                                                                                                                                                            | 0.18                           | 0.83                    |
| Adjustment for confounding factors grouped in levels: Level three                                                                                                                                                                                                                                                                                                                                                                                                                                                                                                                                                                                          | 0.75                           | 0.94                    |
| Adjusted for age (yes)                                                                                                                                                                                                                                                                                                                                                                                                                                                                                                                                                                                                                                     | 0.15                           | 0.50                    |
| Adjusted for stage (yes)                                                                                                                                                                                                                                                                                                                                                                                                                                                                                                                                                                                                                                   | 0.17                           | 0.56                    |
| Adjusted for Gleason score (yes)                                                                                                                                                                                                                                                                                                                                                                                                                                                                                                                                                                                                                           | 0.54                           | 0.85                    |
| Adjusted for smoking (no)                                                                                                                                                                                                                                                                                                                                                                                                                                                                                                                                                                                                                                  | 0.42                           | 0.87                    |
| Adjusted for treatment (yes)                                                                                                                                                                                                                                                                                                                                                                                                                                                                                                                                                                                                                               | 0.16                           | 0.27                    |
| Adjusted for PSA (yes)                                                                                                                                                                                                                                                                                                                                                                                                                                                                                                                                                                                                                                     | 0.86                           | 0.75                    |
| Categorical (obese versus normal weight)                                                                                                                                                                                                                                                                                                                                                                                                                                                                                                                                                                                                                   | 0.26                           | 0.87                    |
| Categorical (overweight versus normal weight)                                                                                                                                                                                                                                                                                                                                                                                                                                                                                                                                                                                                              | <b>0.04</b>                    | 0.32                    |
| <b>Prostate cancer-specific mortality</b>                                                                                                                                                                                                                                                                                                                                                                                                                                                                                                                                                                                                                  |                                |                         |
| Main analysis                                                                                                                                                                                                                                                                                                                                                                                                                                                                                                                                                                                                                                              | 0.23                           | 0.32                    |
| Included low/underweight men                                                                                                                                                                                                                                                                                                                                                                                                                                                                                                                                                                                                                               | 0.13                           | 0.15                    |
| Retrospective cohort                                                                                                                                                                                                                                                                                                                                                                                                                                                                                                                                                                                                                                       | 0.22                           | 0.26                    |
| Geographic location: North America/Caribbean (USA, Canada, Jamaica)                                                                                                                                                                                                                                                                                                                                                                                                                                                                                                                                                                                        | 0.43                           | 0.91                    |
| Adjustment for confounding factors grouped in levels: Level one                                                                                                                                                                                                                                                                                                                                                                                                                                                                                                                                                                                            | 0.15                           | 0.44                    |
| Adjustment for confounding factors grouped in levels: Level two                                                                                                                                                                                                                                                                                                                                                                                                                                                                                                                                                                                            | 0.35                           | 0.55                    |
| Adjustment for confounding factors grouped in levels: Level three                                                                                                                                                                                                                                                                                                                                                                                                                                                                                                                                                                                          | 0.15                           | 0.44                    |
| Adjusted for age (yes)                                                                                                                                                                                                                                                                                                                                                                                                                                                                                                                                                                                                                                     | 0.26                           | 0.36                    |
| Adjusted for stage (yes)                                                                                                                                                                                                                                                                                                                                                                                                                                                                                                                                                                                                                                   | 0.26                           | 0.44                    |
| Adjusted for Gleason score (yes)                                                                                                                                                                                                                                                                                                                                                                                                                                                                                                                                                                                                                           | 0.15                           | 0.35                    |
| Adjusted for treatment (yes)                                                                                                                                                                                                                                                                                                                                                                                                                                                                                                                                                                                                                               | 0.32                           | 0.50                    |
| Categorical (obese versus normal weight)                                                                                                                                                                                                                                                                                                                                                                                                                                                                                                                                                                                                                   | <b>0.03</b>                    | <b>0.01</b>             |
| Categorical (overweight versus normal weight)                                                                                                                                                                                                                                                                                                                                                                                                                                                                                                                                                                                                              | 0.27                           | 0.35                    |
| <b>Measure of asymmetry:</b>                                                                                                                                                                                                                                                                                                                                                                                                                                                                                                                                                                                                                               |                                |                         |
| Egger's test: Models log HR (dependent variable) as a function of the estimated standard error (SE) of log (HR)                                                                                                                                                                                                                                                                                                                                                                                                                                                                                                                                            |                                |                         |
| Debray's test: Models log HR (dependent variable) as a function of the number of events per study. *Before applying Debray's test we excluded any study that did not provide the number of observed events (deaths), or if these could not be estimated [one from the linear dose-response analyses of all-cause mortality, one from the analyses of prostate cancer specific mortality, two from the categorical subgroup analysis of all-cause mortality and one from categorical analysis of PCa-specific mortality. When Chalfin 2014 and Halabi 2007 were used in categorical analyses the total number of events was used as the closest estimation. |                                |                         |

**SUPPLEMENTARY FIGURES**

**Supplementary Figure 1 Non-Linear meta-analysis for the association between BMI A) and all-cause mortality and B) PCa-specific mortality using midpoint values for open ended categories obtained from the literature (with 95% confidence intervals and 95% prediction intervals of the curve).**

**(A)**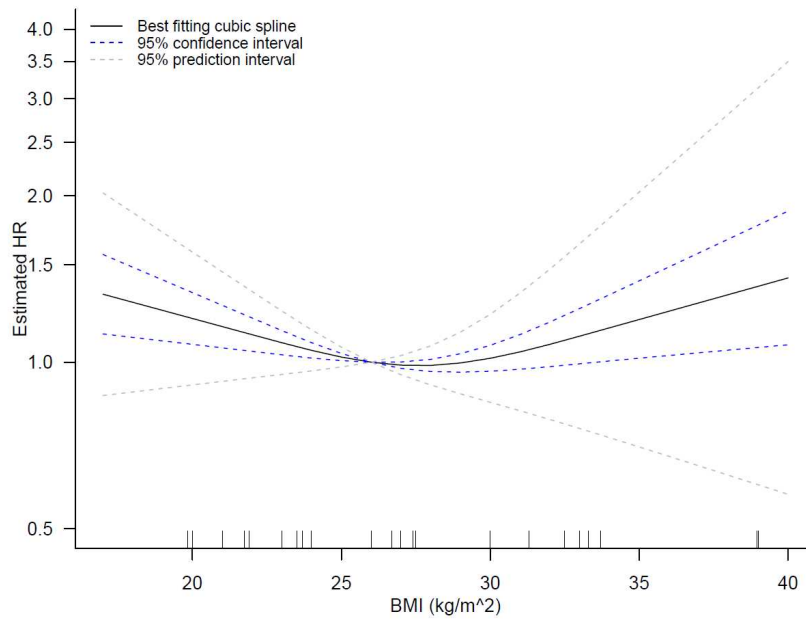**(B)**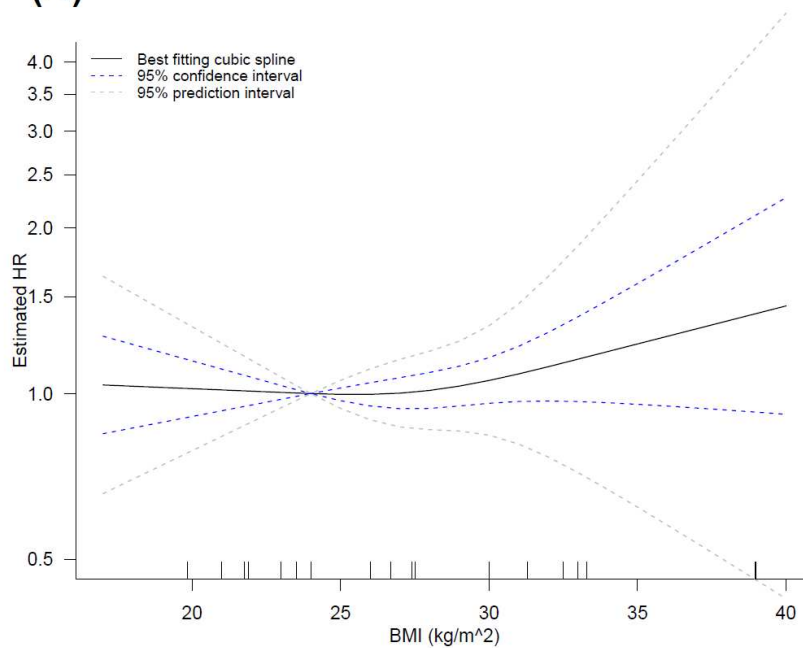

**Supplementary Figure 2 A) Relation between BMI and all-cause mortality with the estimated trend of the natural logarithm of HR according to BMI level in each included study of high risk/advanced PCa and B) Non-linear association between post-diagnosis BMI and all-cause mortality; C) Relation between BMI and all-cause mortality with the estimated trend of the natural logarithm of HR according to BMI level in each included study of risk groups one/two/three and D) Non-linear association between post-diagnosis BMI and all-cause mortality in groups one/two/three.**

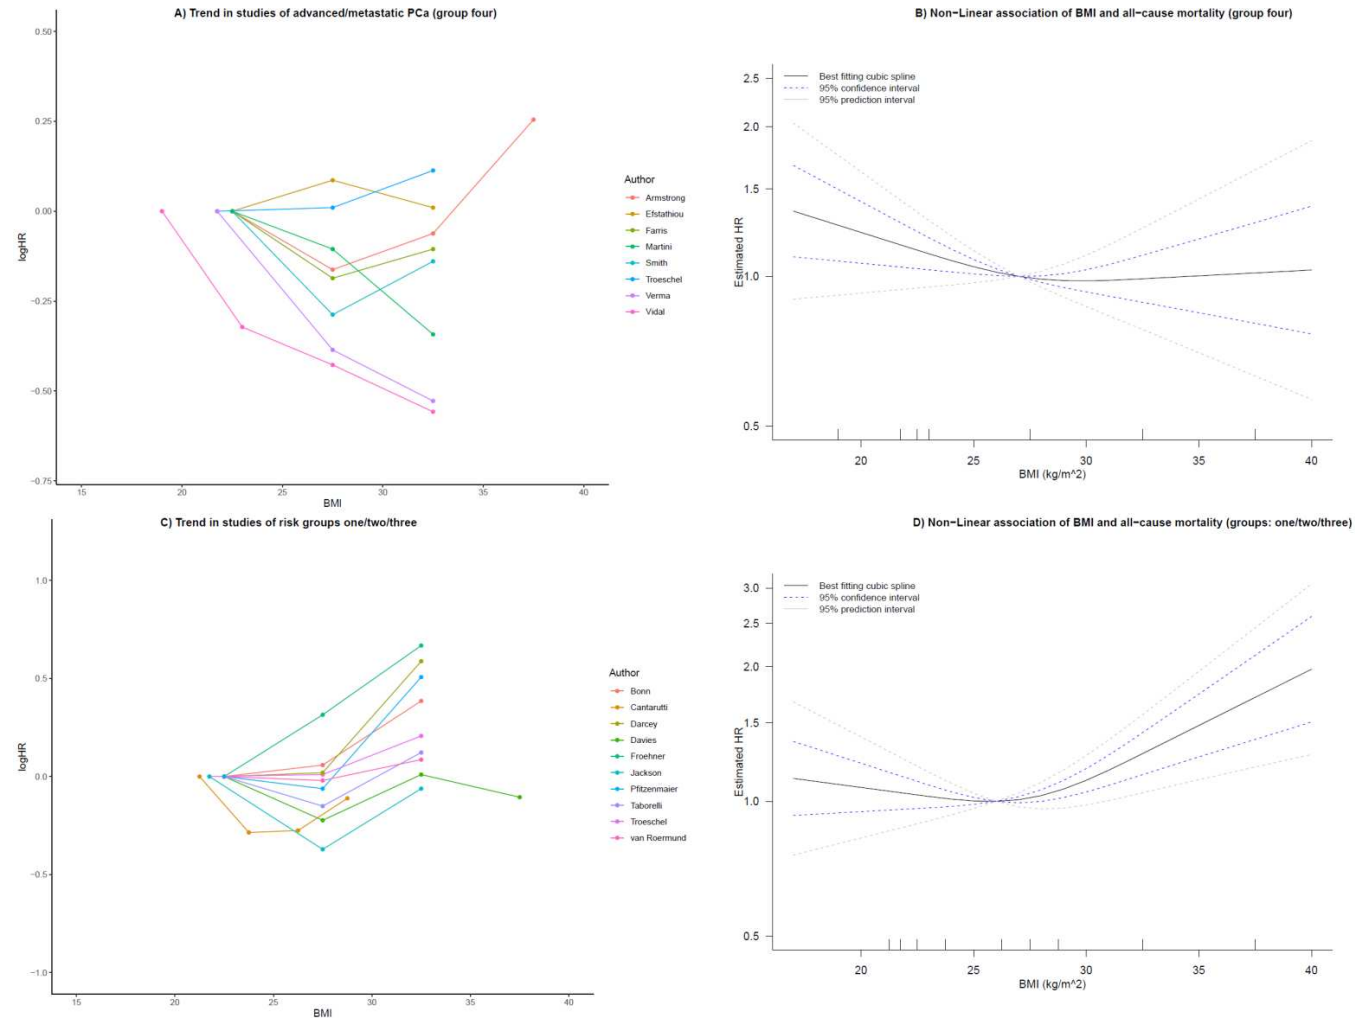

**Supplementary Figure 3 Influence (leave-one-out) analysis for postdiagnosis BMI and A) all-cause mortality and B) PCa-specific mortality**

**A**

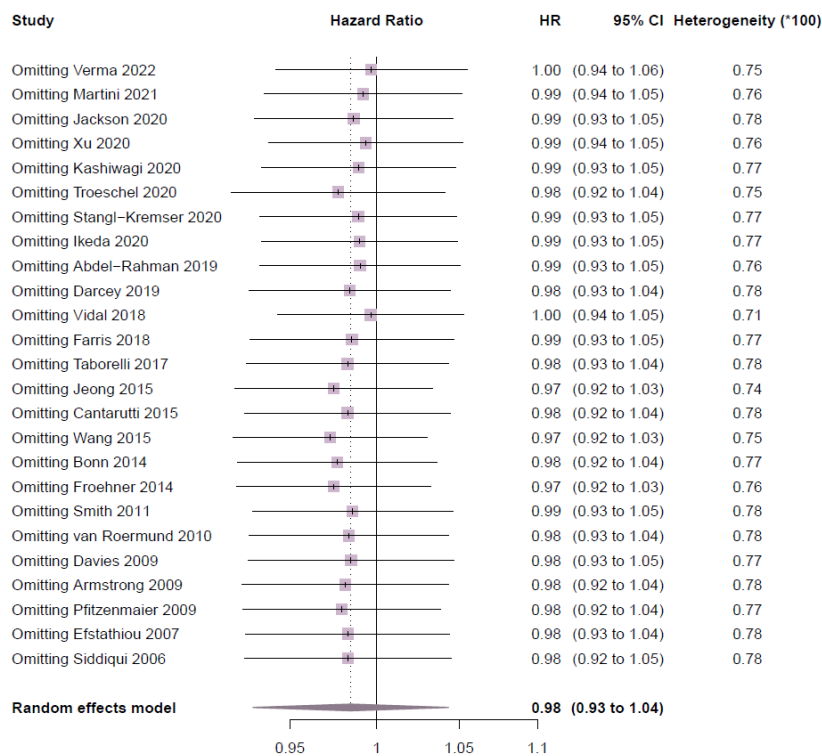

**B**

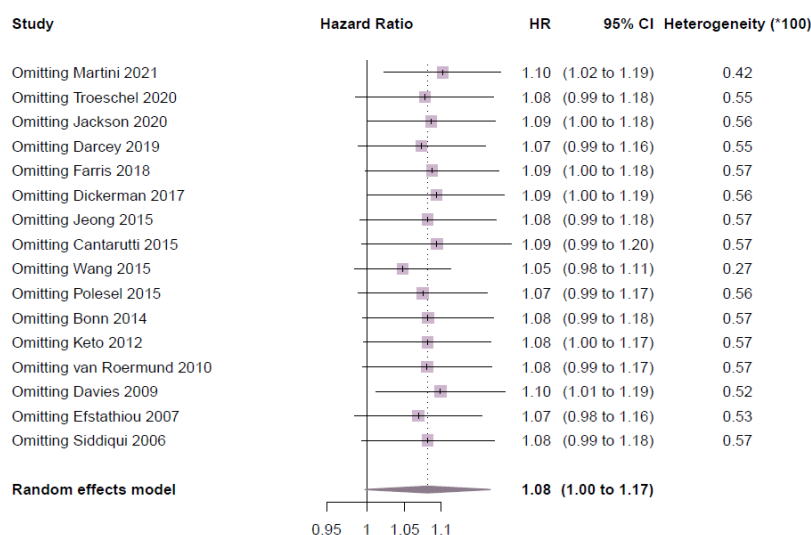

### Categorical meta-analyses (all-cause mortality)

Supplementary Figure 4 Summary hazard ratio estimate (95% CI) of A) all-cause mortality comparing overweight versus normal weight men with PCa B) Sensitivity (leave one out analysis).

A

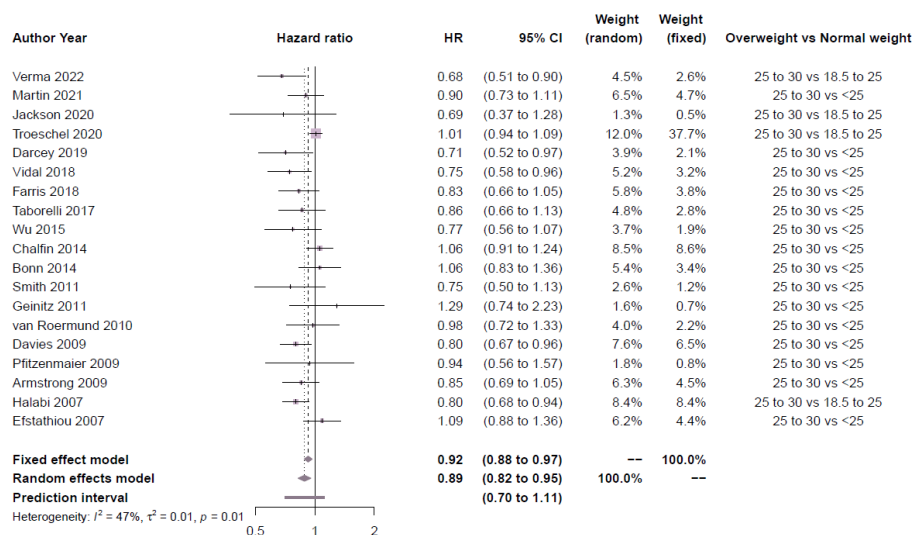

B

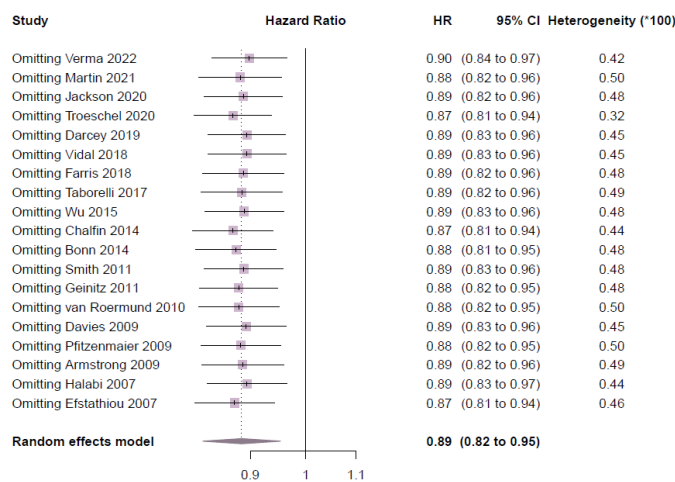



**Supplementary Figure 5** Funnel plot of studies included in the categorical analysis of overweight versus normal weight men with PCa for all-cause mortality.

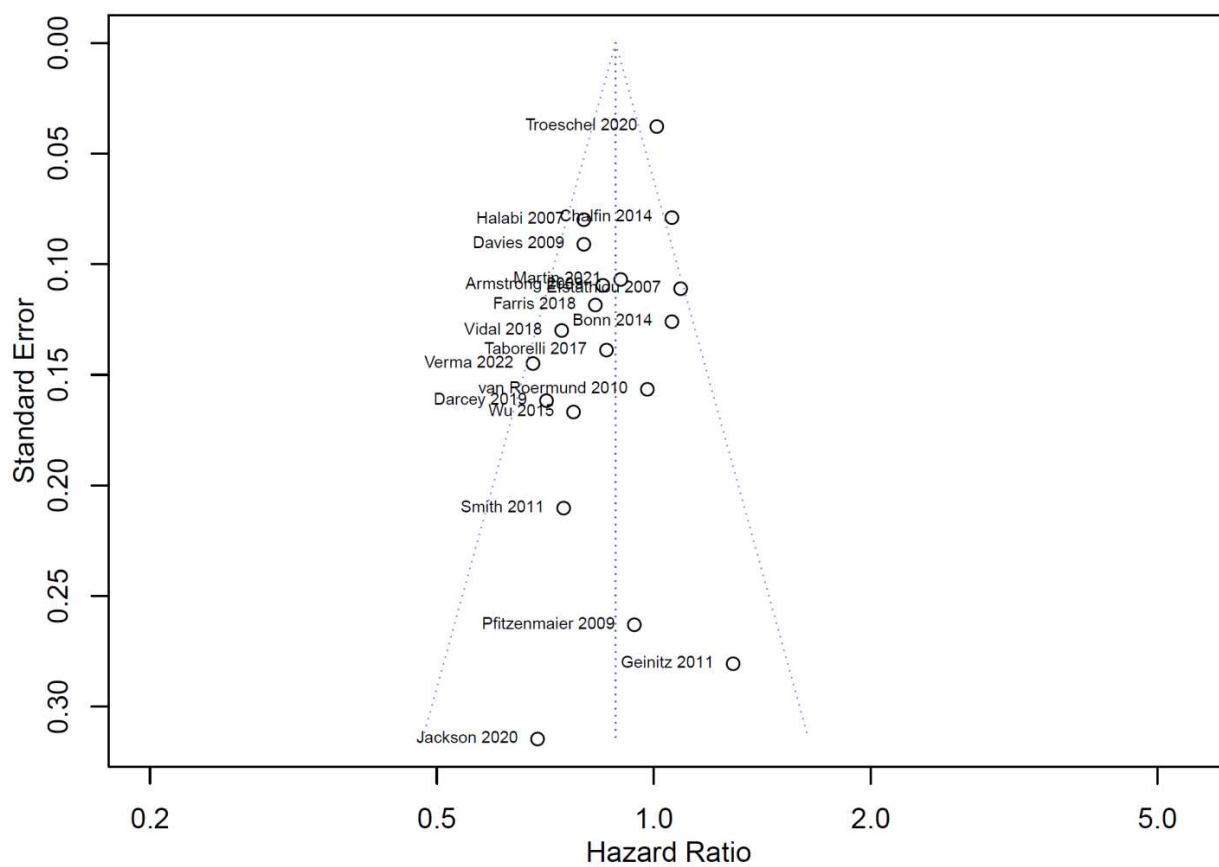

**Supplementary Figure 6 A) Summary hazard ratio estimate (95% CI) of all-cause mortality comparing obese versus normal weight men with PCa B) Sensitivity (leave one out analysis).**

**A**

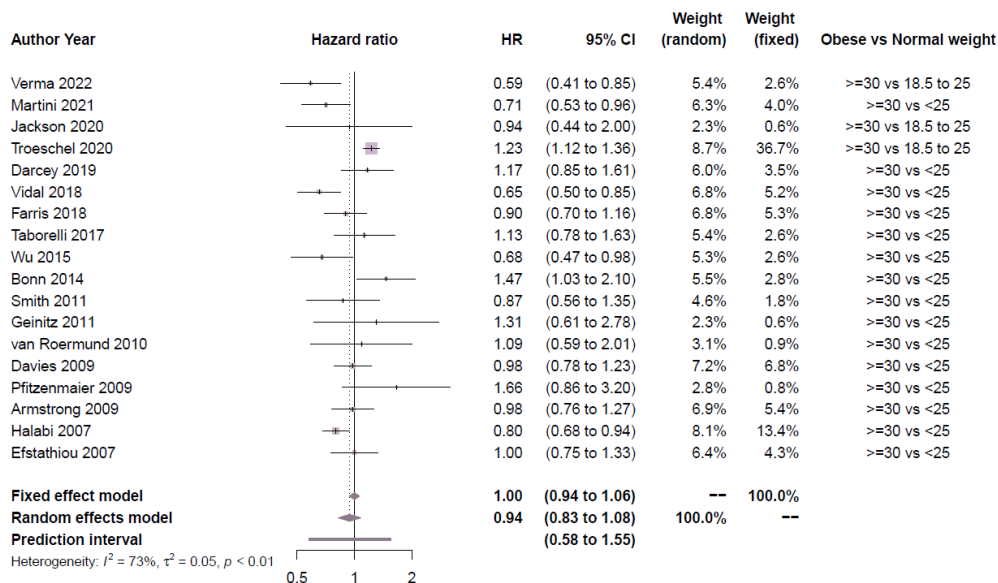

**B**

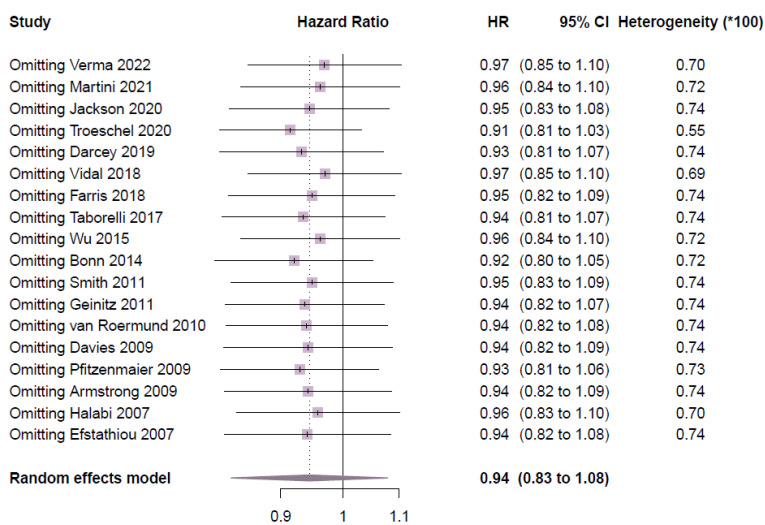

**Supplementary Figure 7** Funnel plot of studies included in the categorical analysis of obese versus normal weight men with PCa for all-cause mortality.

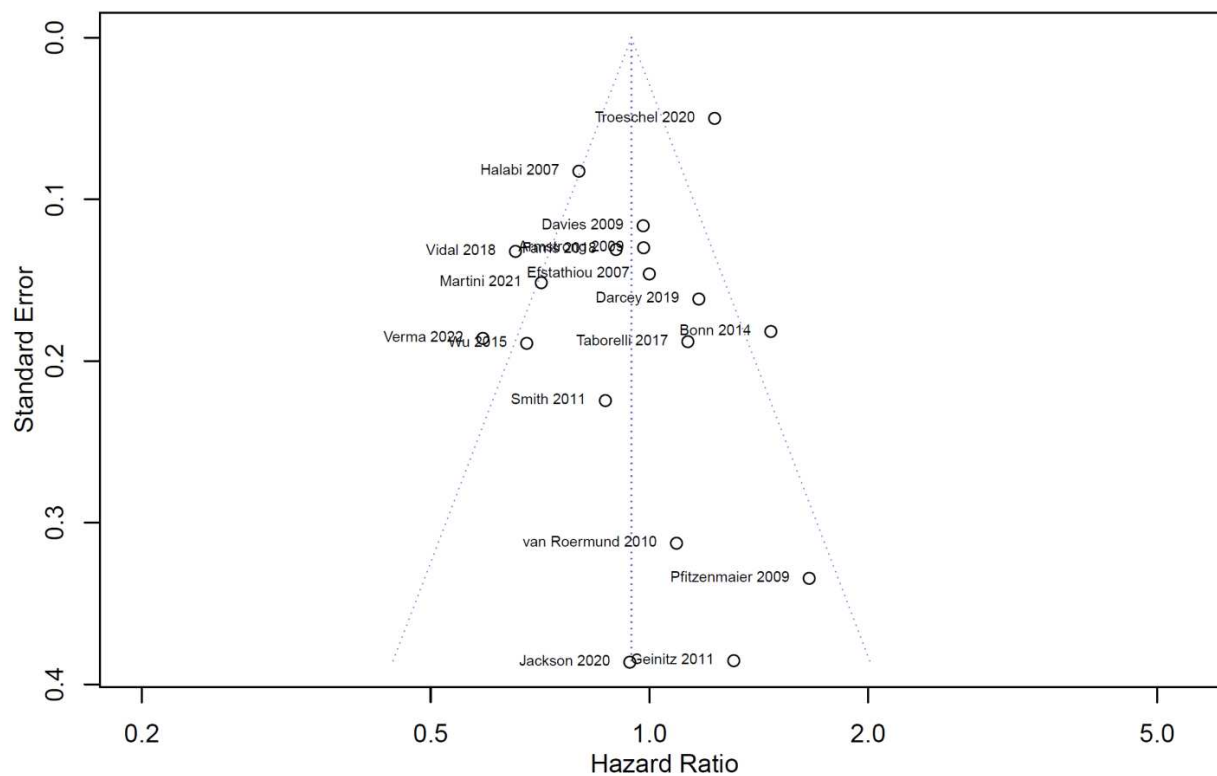

**Supplementary Figure 8 A) Relation between BMI and PCa-specific mortality with the estimated trend of the natural logarithm of HR according to BMI level in each included study of risk groups one/two/three and B) Non-linear association between post-diagnosis BMI and PCa-specific mortality in risk groups one/two/three.**

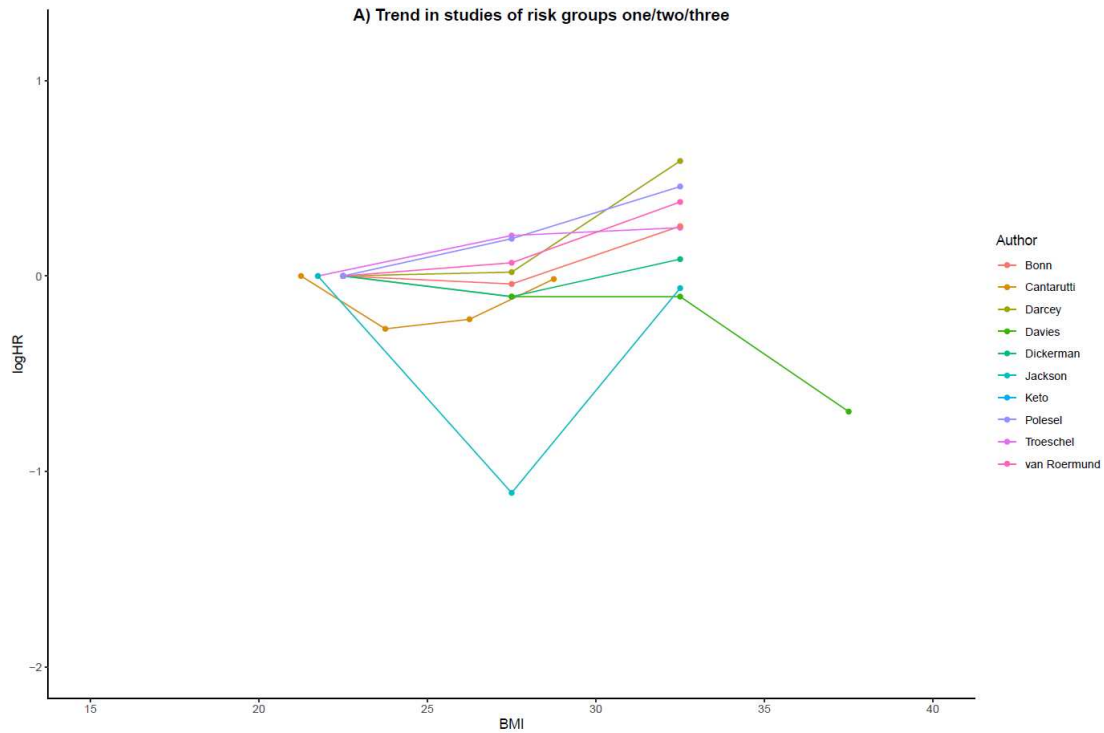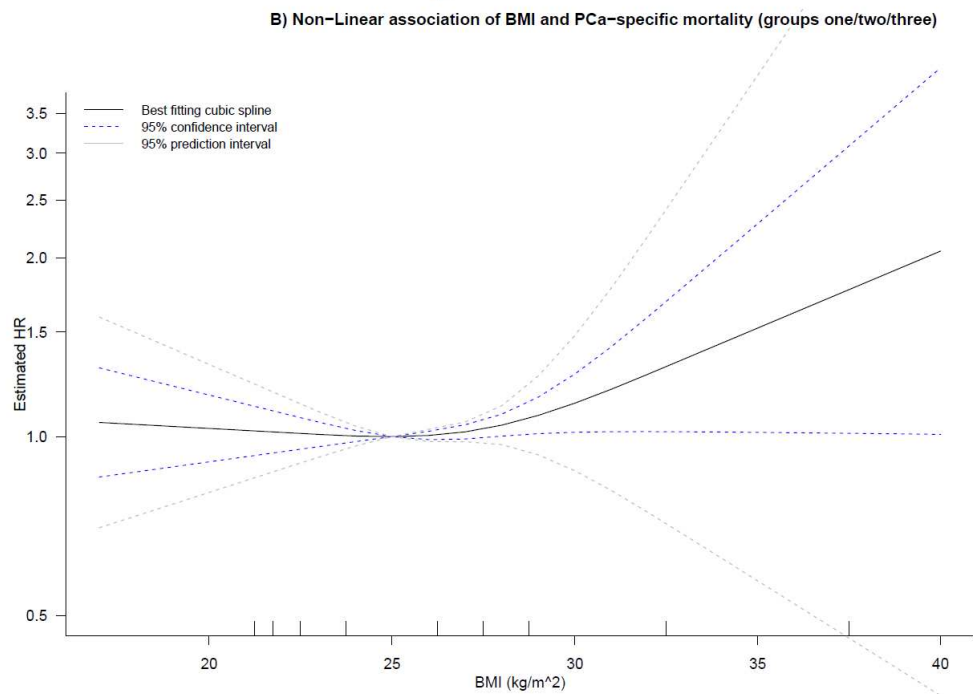

### Categorical meta-analyses (PCa-specific mortality)

Supplementary Figure 9 A) Summary hazard ratio estimate (95% CI) of PCa-specific mortality comparing overweight versus normal weight men with PCa B) Sensitivity (leave one out analysis).

A

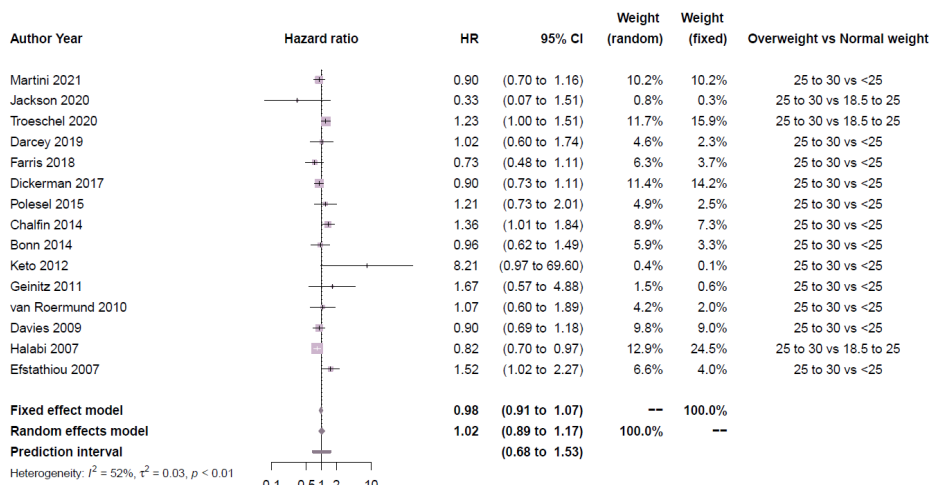

B

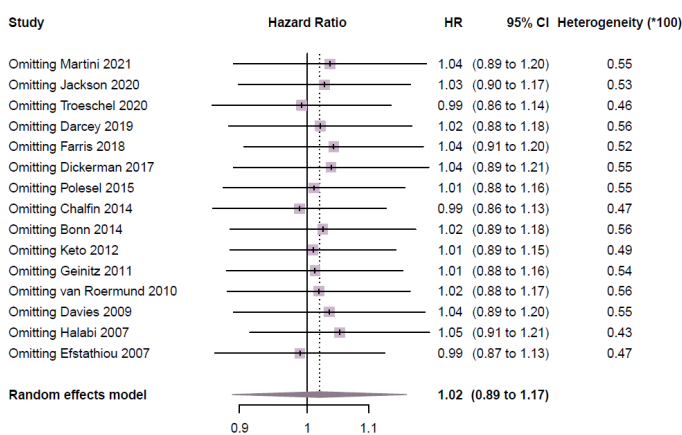

**Supplementary Figure 10** Funnel plot of studies included in the categorical analysis of overweight versus normal weight men with PCa and risk of PCa-specific mortality.

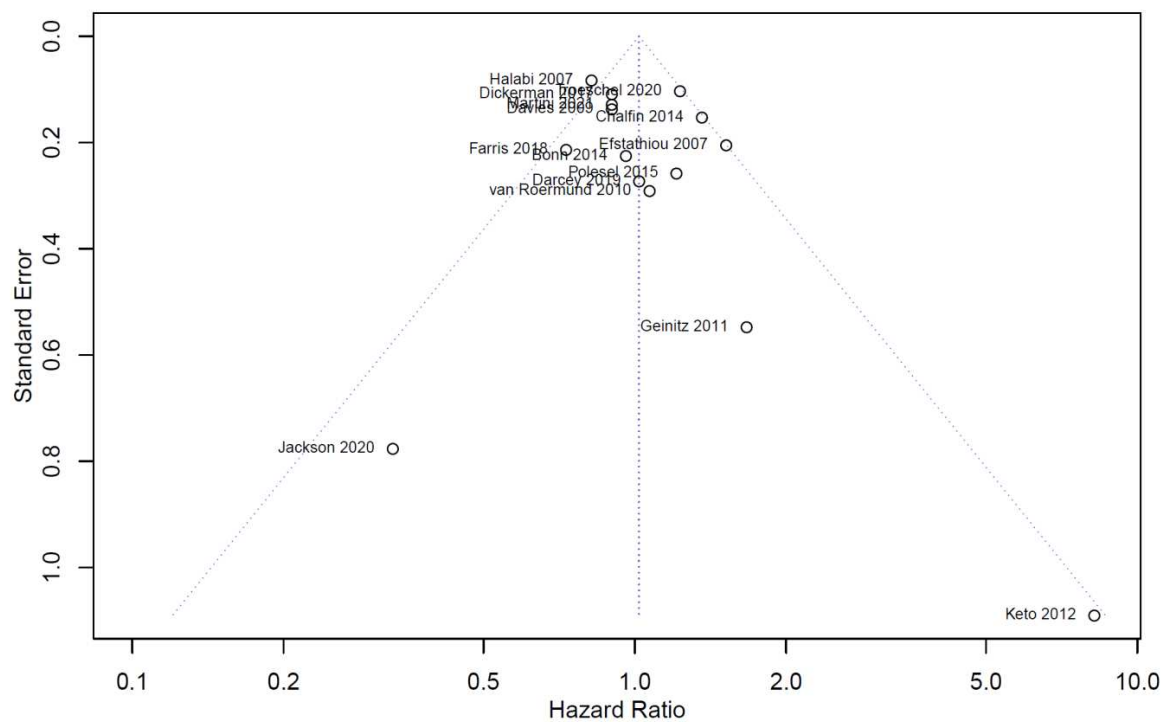

**Supplementary Figure 11 A) Summary hazard ratio estimate (95% CI) of PCa-specific mortality comparing obese versus normal weight men with PCa B) Sensitivity (leave one out analysis).**

**A**

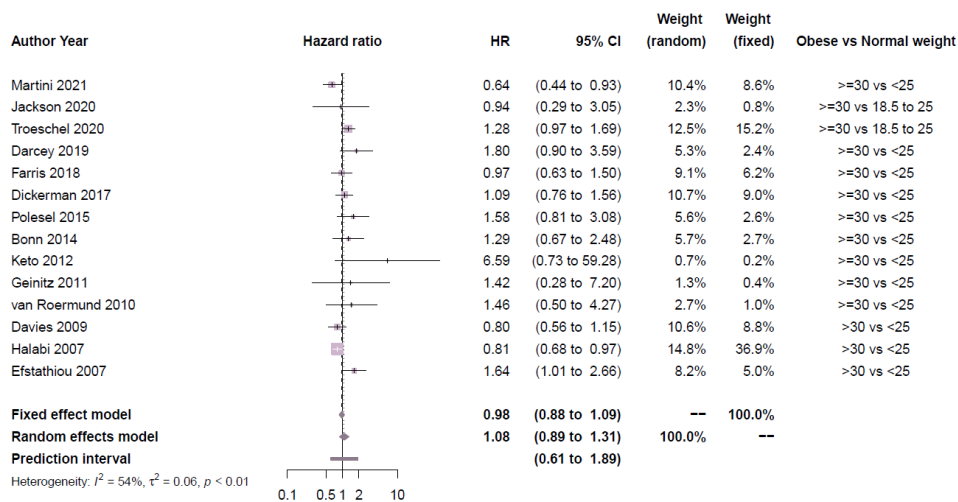

**B**

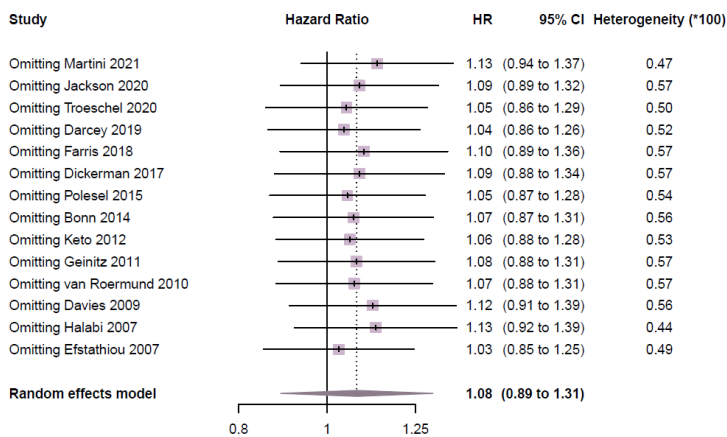

**Supplementary Figure 12** Funnel plot of studies included in the categorical analysis of obese versus normal weight men with PCa and risk of PCa-specific mortality.

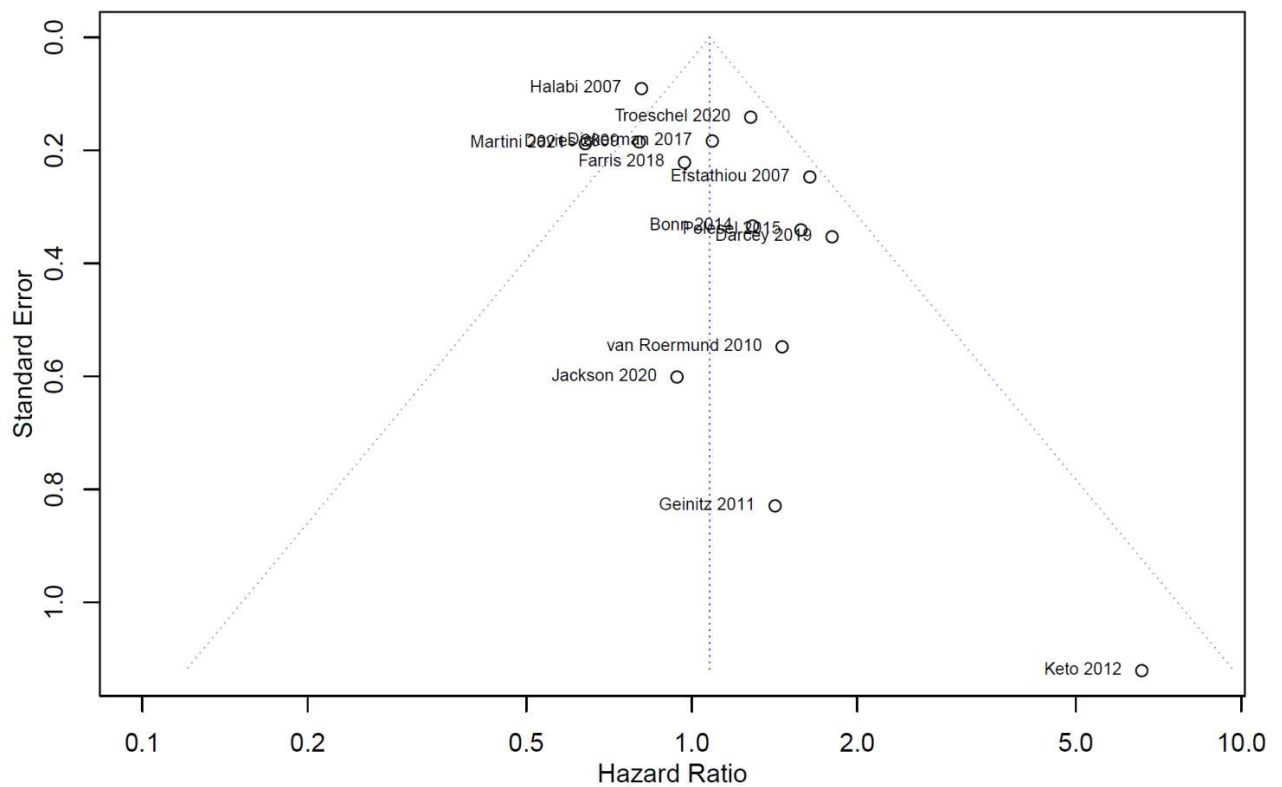



## Linear dose-response subgroup meta-analyses (BMI and all-cause mortality)

Supplementary Figure 13 Summary hazard ratio estimate (95% CI) of all-cause mortality for postdiagnosis 5 kg/m<sup>2</sup> BMI increments for A) studies that included underweight groups and B) studies that excluded the underweight groups.

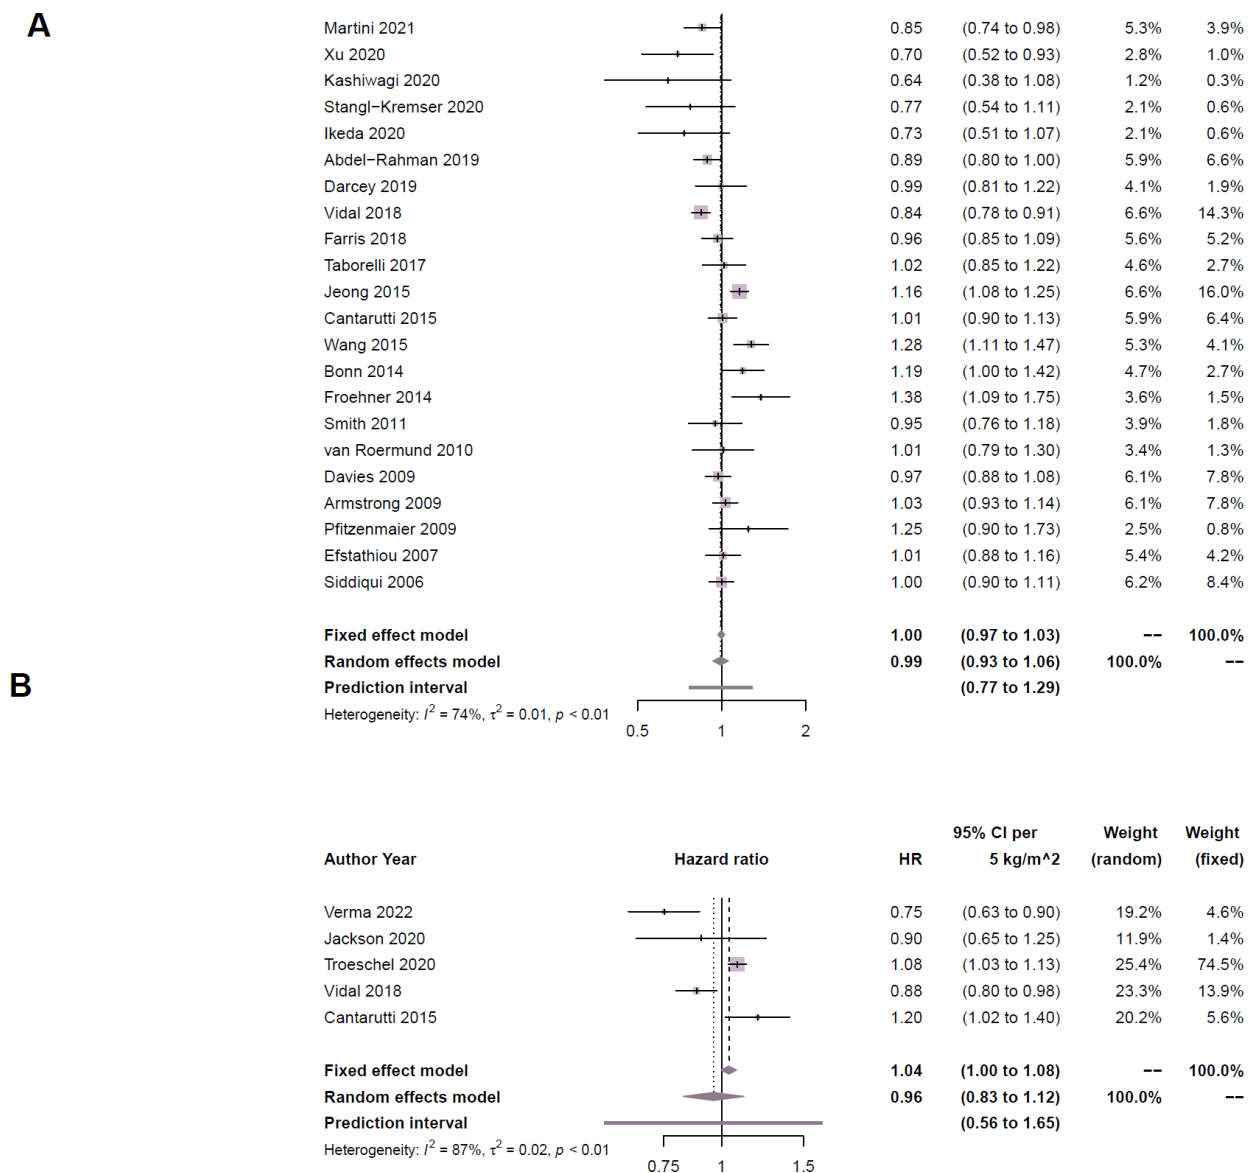

**Supplementary Figure 14 Summary hazard ratio estimate (95% CI) of all-cause mortality for post-diagnosis 5 kg/m<sup>2</sup> BMI increments by study design retrospective cohort versus prospective cohort.**

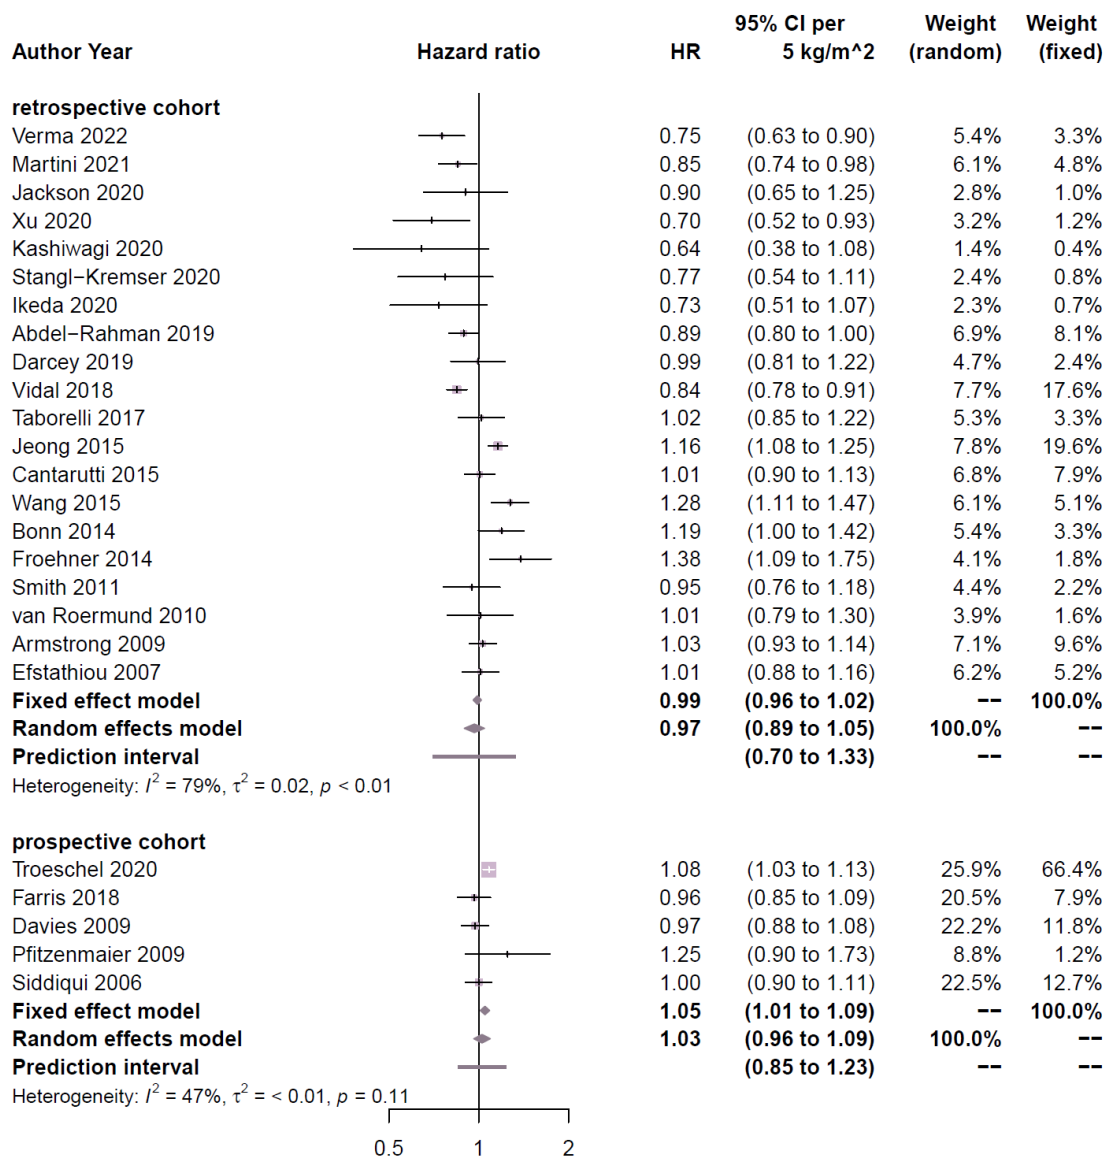

**Supplementary Figure 15 Summary hazard ratio estimate (95% CI) of all-cause mortality for post-diagnosis 5 kg/m<sup>2</sup> BMI increments number of median deaths.**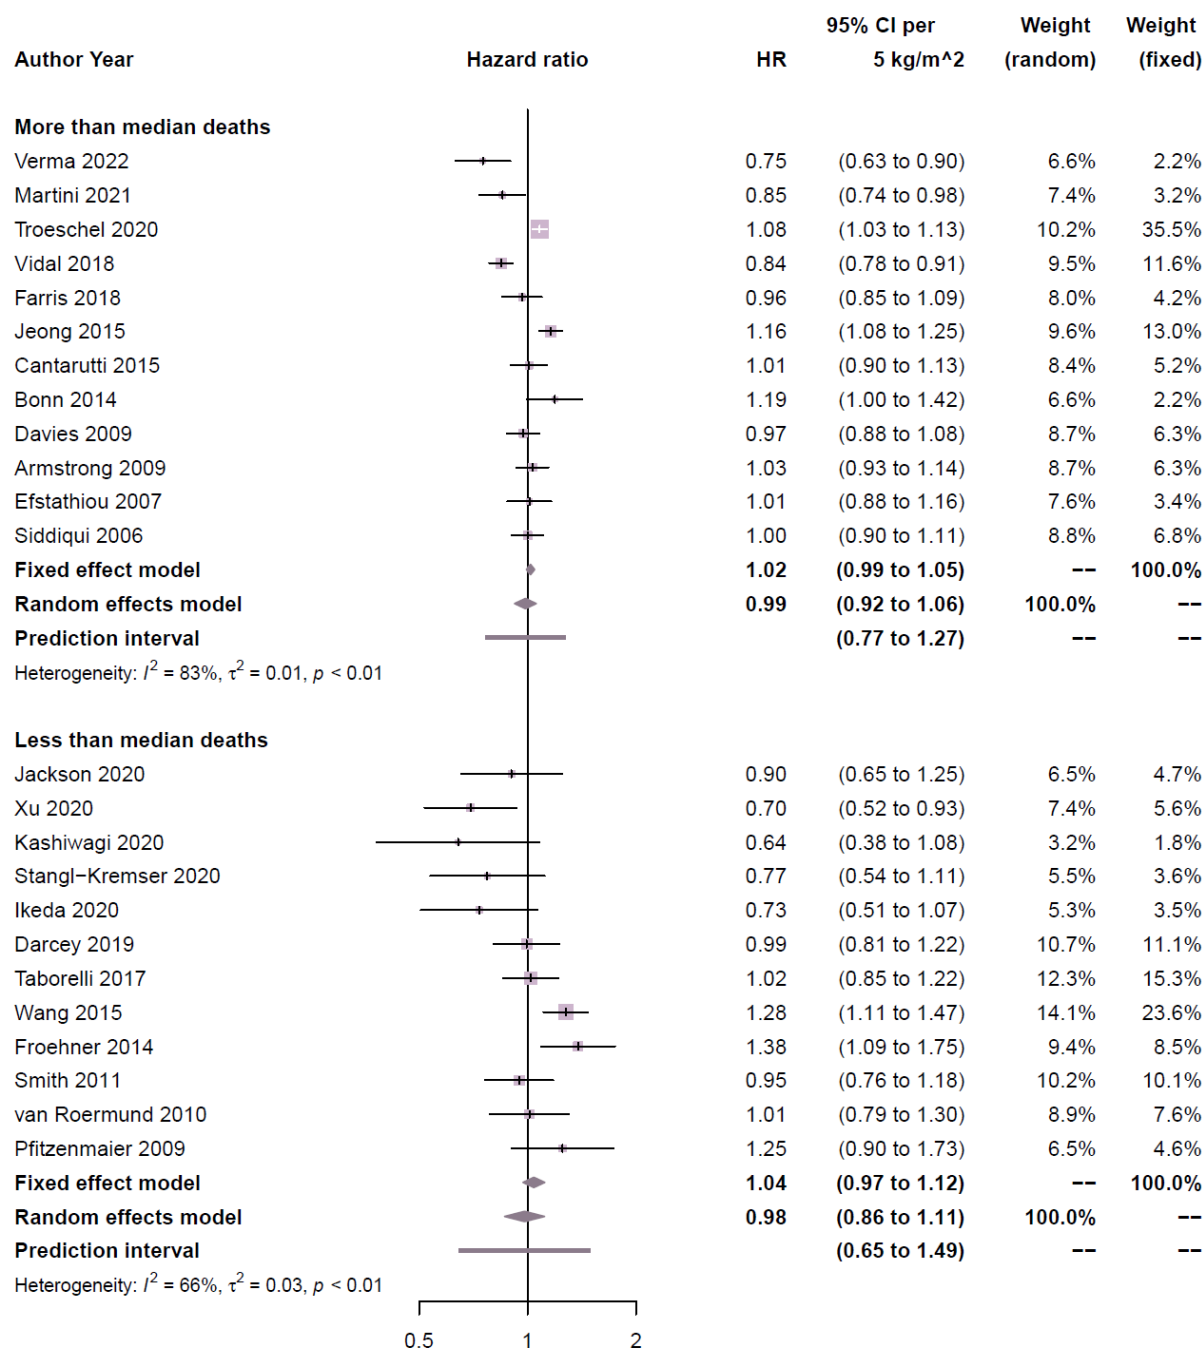

**Supplementary Figure 16 Summary hazard ratio estimate (95% CI) of all-cause mortality for post-diagnosis 5 kg/m<sup>2</sup> BMI increments by method of anthropometry assessment.**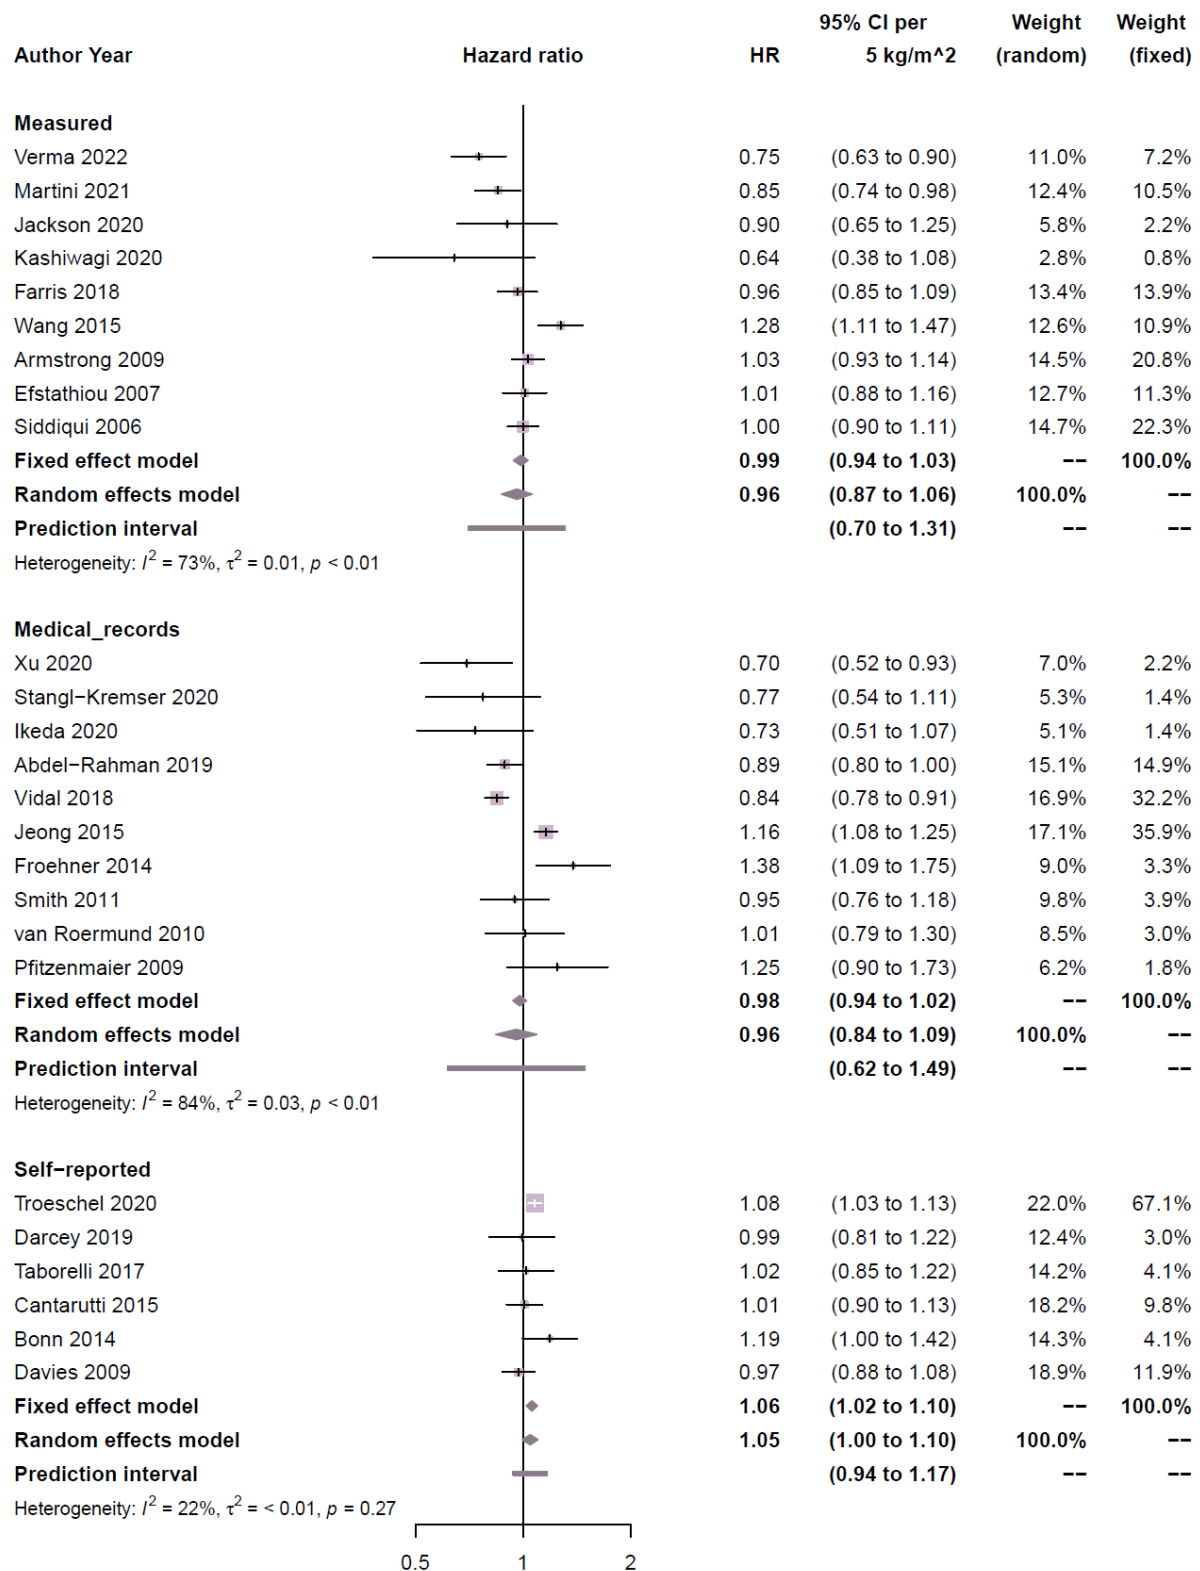

**Supplementary Figure 17 Summary hazard ratio estimate (95% CI) of all-cause mortality for post-diagnosis 5 kg/m<sup>2</sup> BMI increments by median follow-up time 10 years.**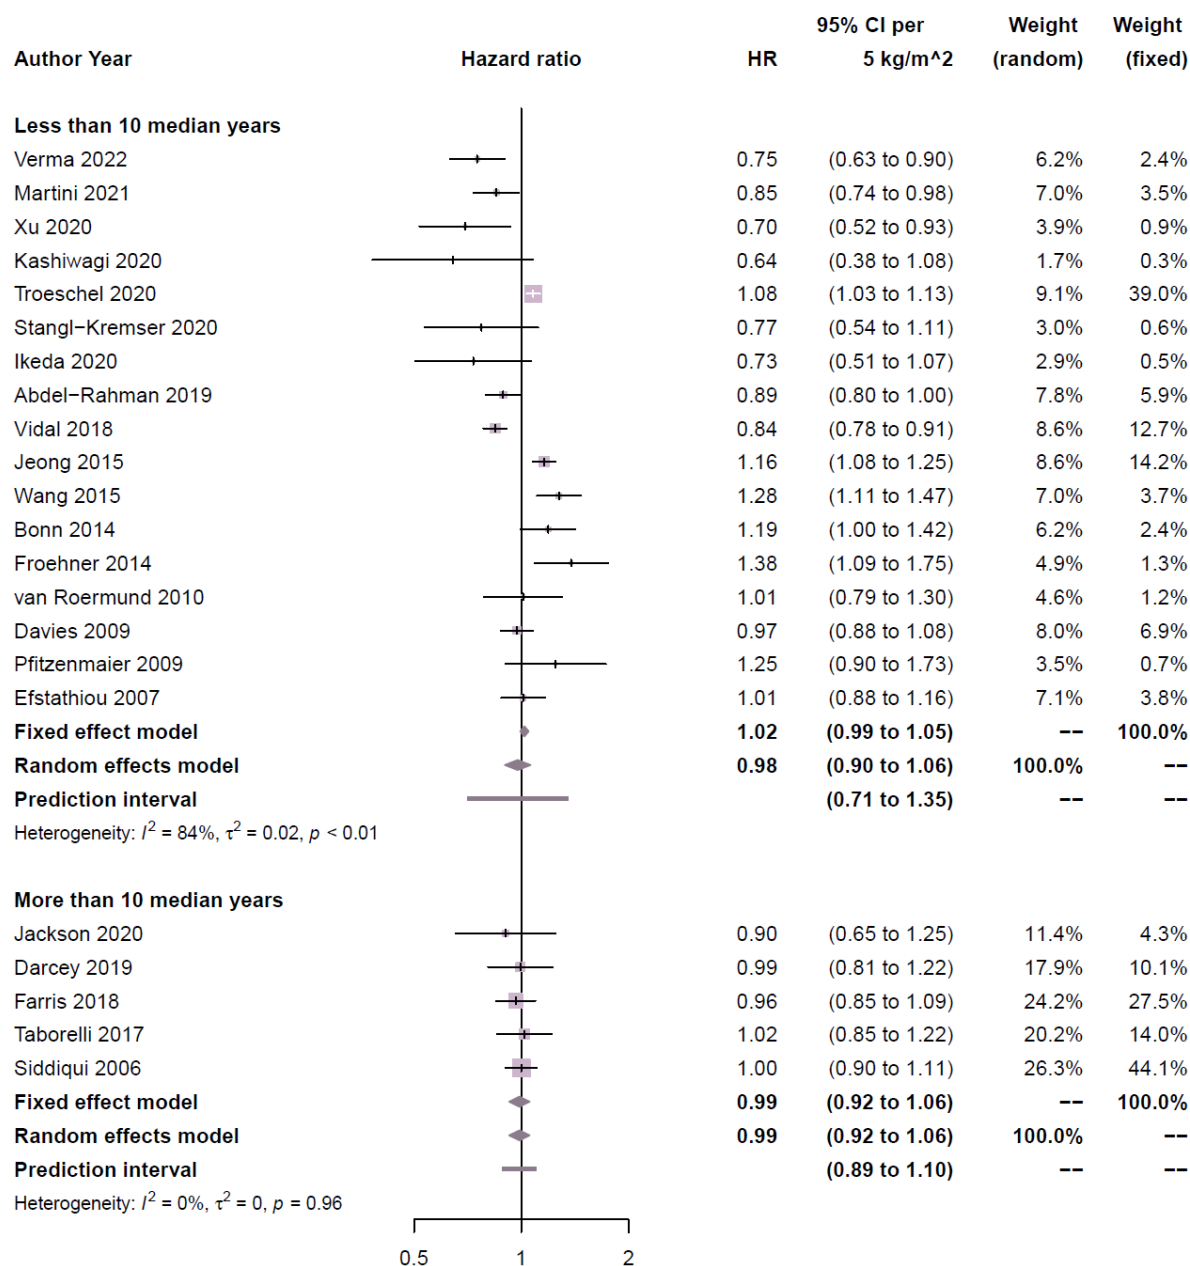

**Supplementary Figure 18 Summary hazard ratio estimate (95% CI) of all-cause mortality for post-diagnosis 5 kg/m<sup>2</sup> BMI increments by geographic location of study.**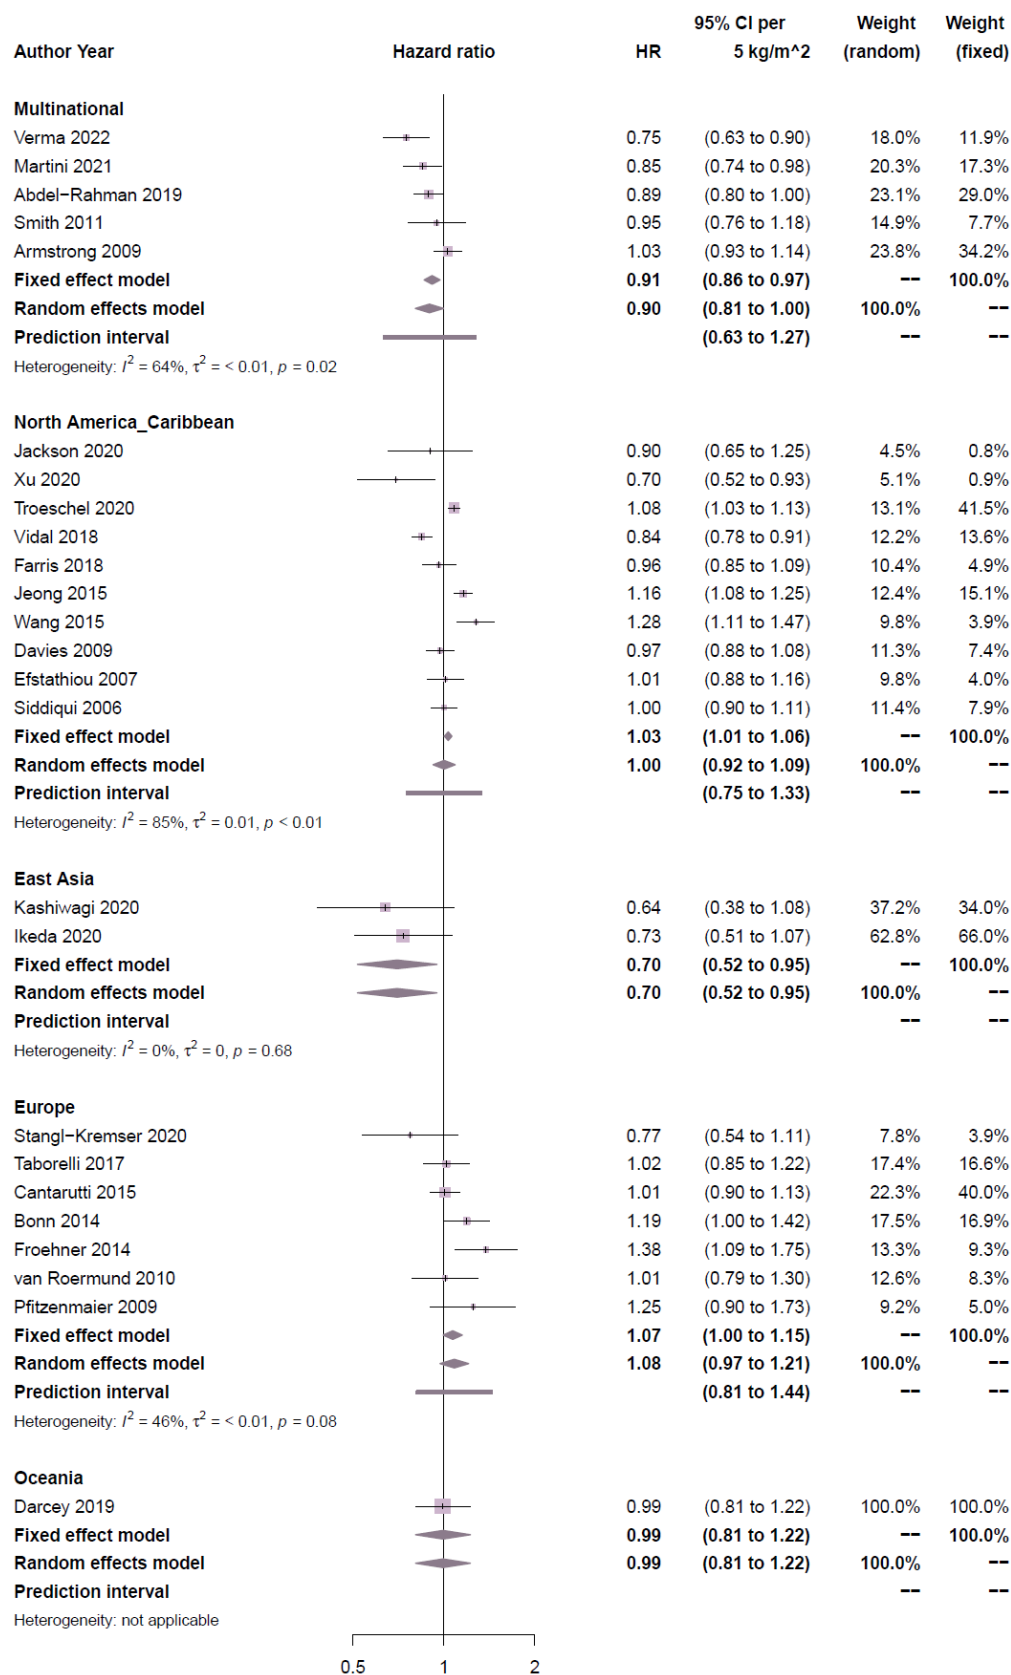

**Supplementary Figure 19 Summary hazard ratio estimate (95% CI) of all-cause mortality for post-diagnosis 5 kg/m<sup>2</sup> BMI increments by geographic location of study among the studies in “group 4” (advanced/metastatic).**

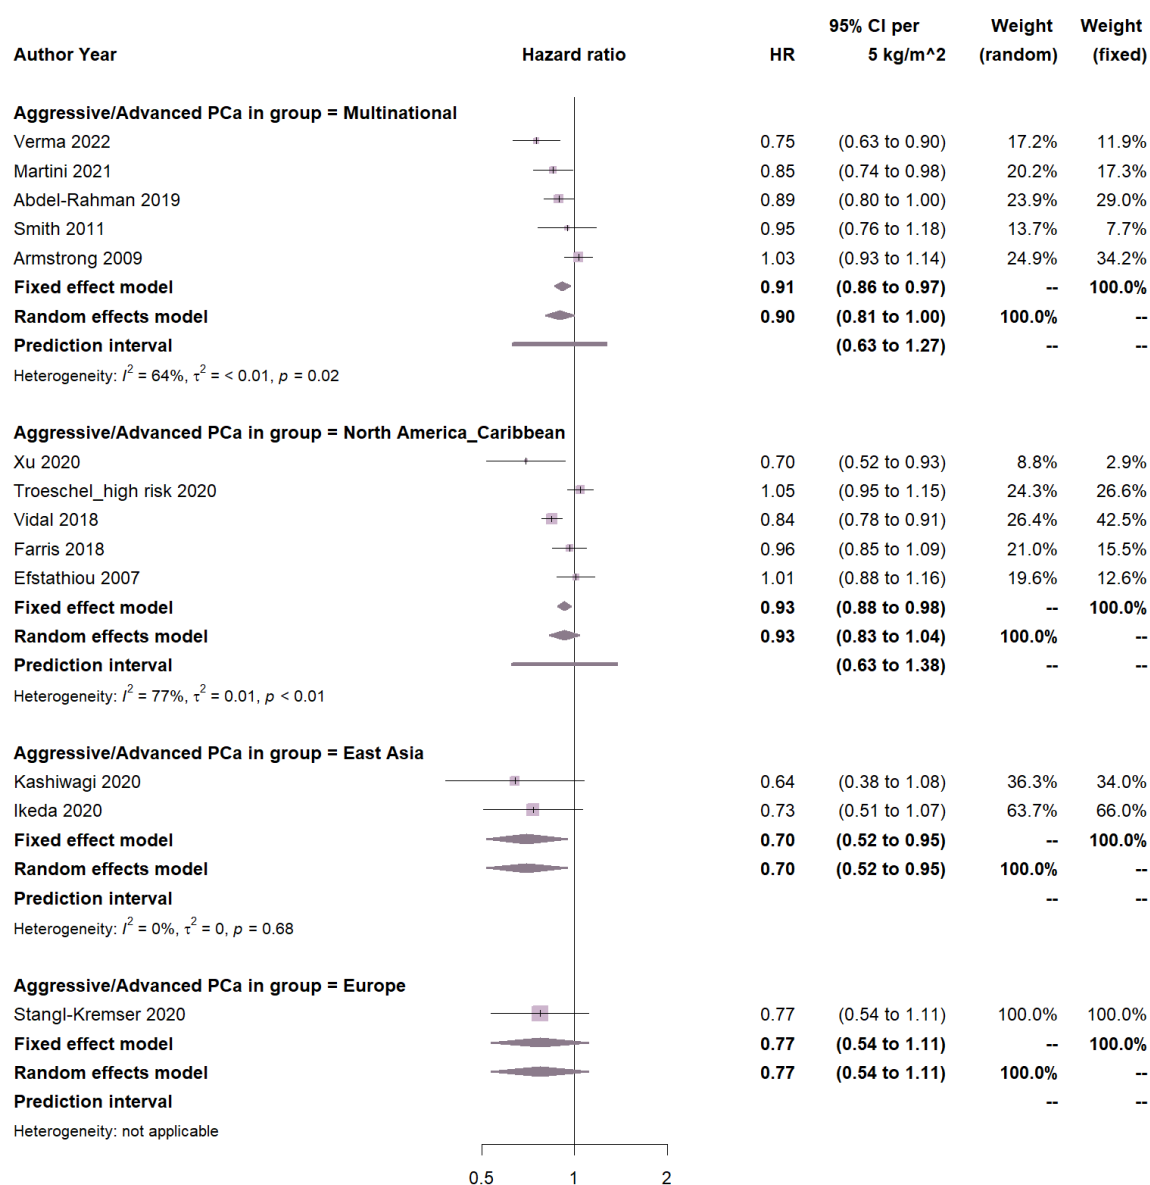

**Supplementary Figure 20 Summary hazard ratio estimate (95% CI) of all-cause mortality for post-diagnosis 5 kg/m<sup>2</sup> BMI increments by tumour risk groups (group one: low risk/early stage, group two: Mixed PCa i.e., low, and high risk could include metastatic or not, group three: Mixed PCa i.e., low, and high risk but state excludes advanced/metastatic, group four: Advanced/High risk PCa and could include metastatic.**

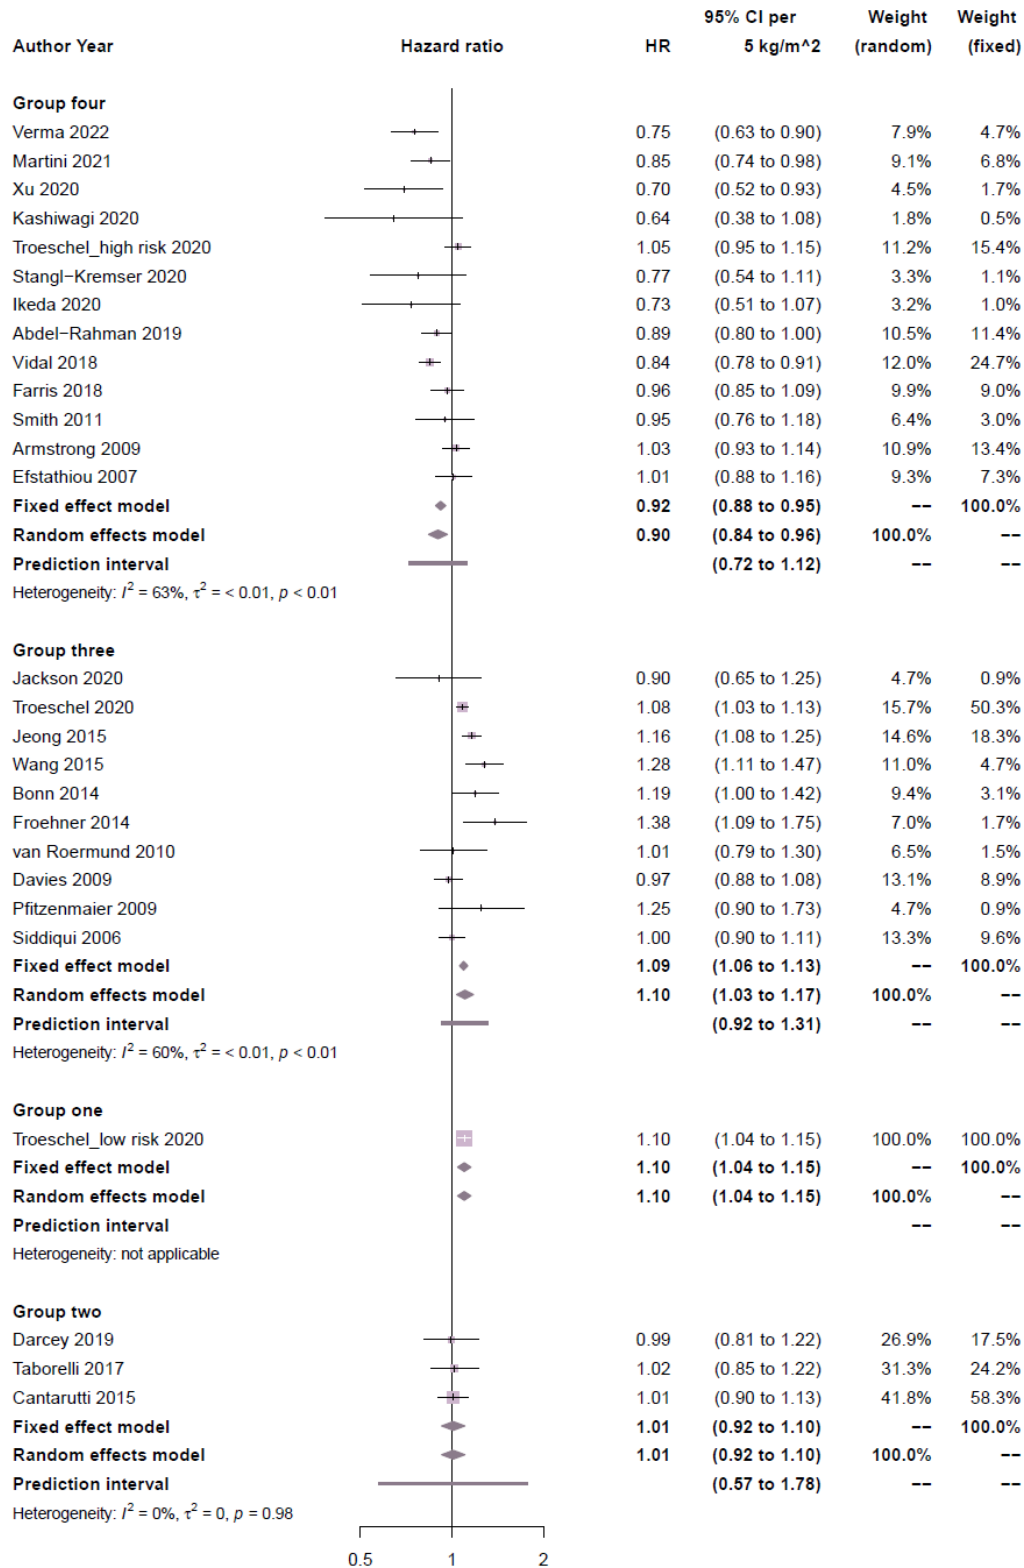



**Supplementary Figure 21 Summary hazard ratio estimate (95% CI) of all-cause mortality for post-diagnosis 5 kg/m<sup>2</sup> BMI increments for adjustment level one: adjusted at least for age, stage and grade (clinical risk/state).**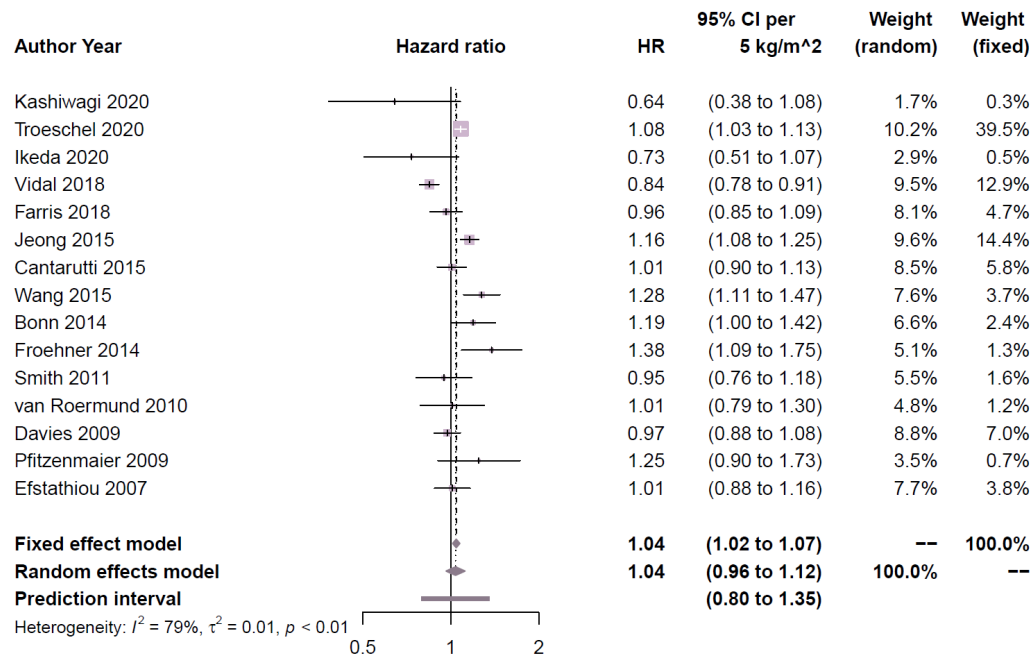**Supplementary Figure 22 Summary hazard ratio estimate (95% CI) of all-cause mortality for post-diagnosis 5 kg/m<sup>2</sup> BMI increments for adjustment level two: adjusted at least for age, stage OR grade (clinical risk/state).**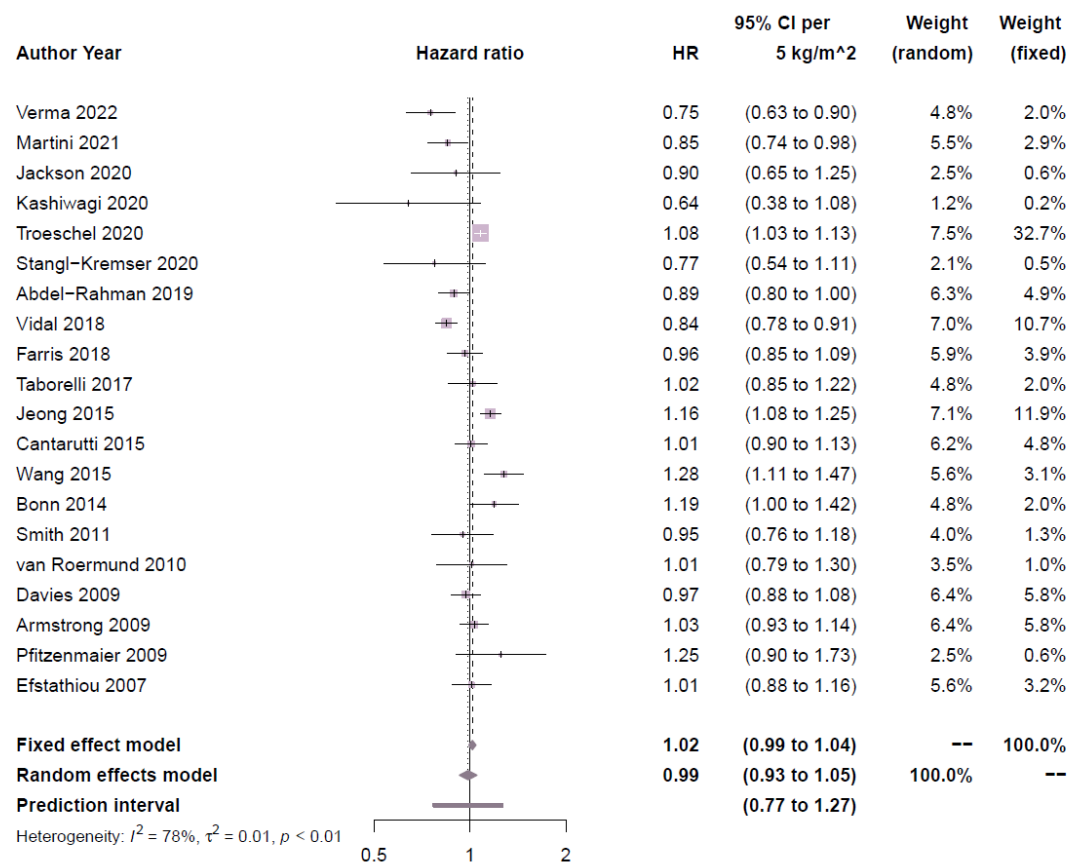

**Supplementary Figure 23 Summary hazard ratio estimate (95% CI) of all-cause mortality for post-diagnosis 5 kg/m<sup>2</sup> BMI increments for adjustment level three: adjusted at least for age, stage, grade (clinical risk/state) and treatment (any).**

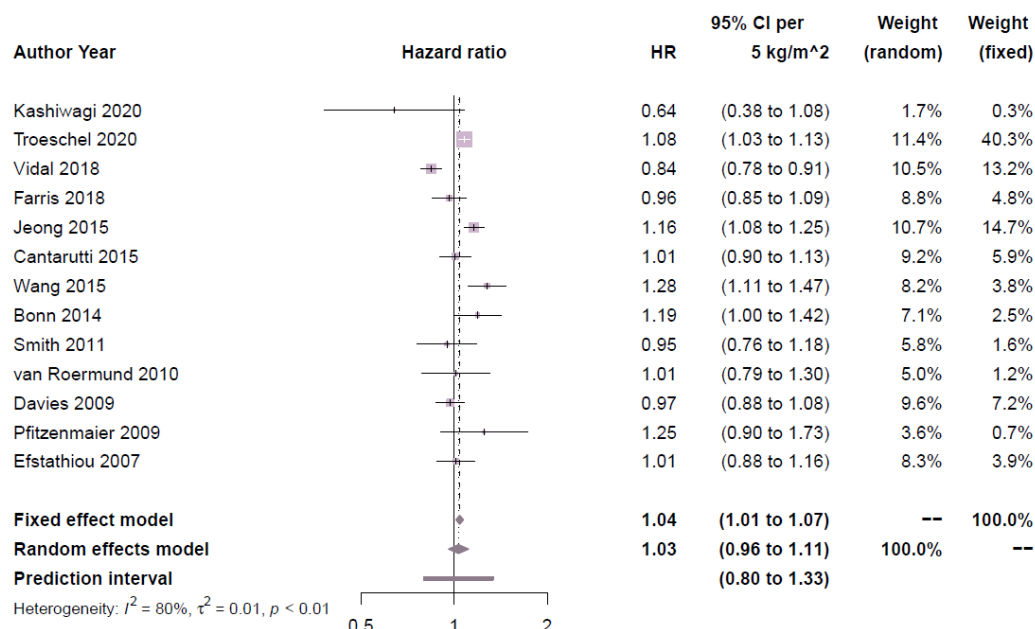

**Supplementary Figure 24 Summary hazard ratio estimate (95% CI) of all-cause mortality for post-diagnosis 5 kg/m<sup>2</sup> BMI increments for adjustment level four: age, stage, grade (clinical risk/state), treatment (any) and smoking.**

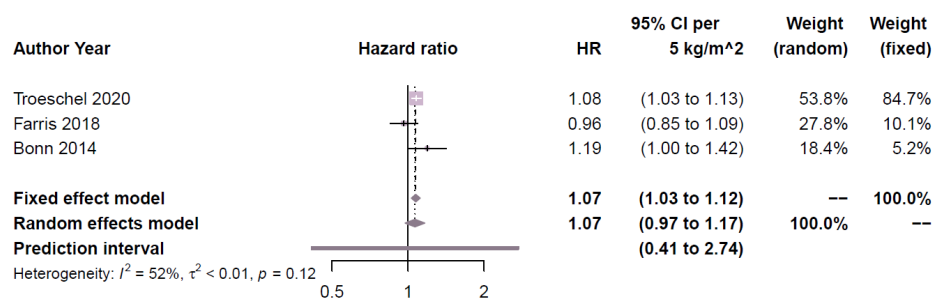

**Supplementary Figure 25 Summary hazard ratio estimate (95% CI) of all-cause mortality for post-diagnosis 5 kg/m<sup>2</sup> BMI increments for adjustment level five: age, stage, grade, treatment (any), smoking and PSA test (PSA levels as proxy).**

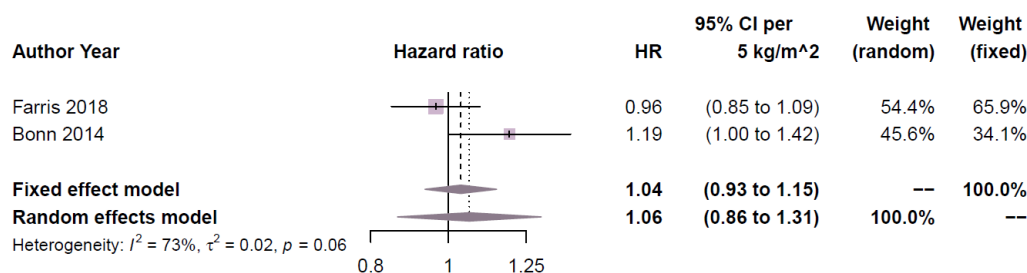

**Supplementary Figure 26 Summary hazard ratio estimate (95% CI) of all-cause mortality for post-diagnosis 5 kg/m<sup>2</sup> BMI increments by individual confounders: Accounted for age (yes vs no).**

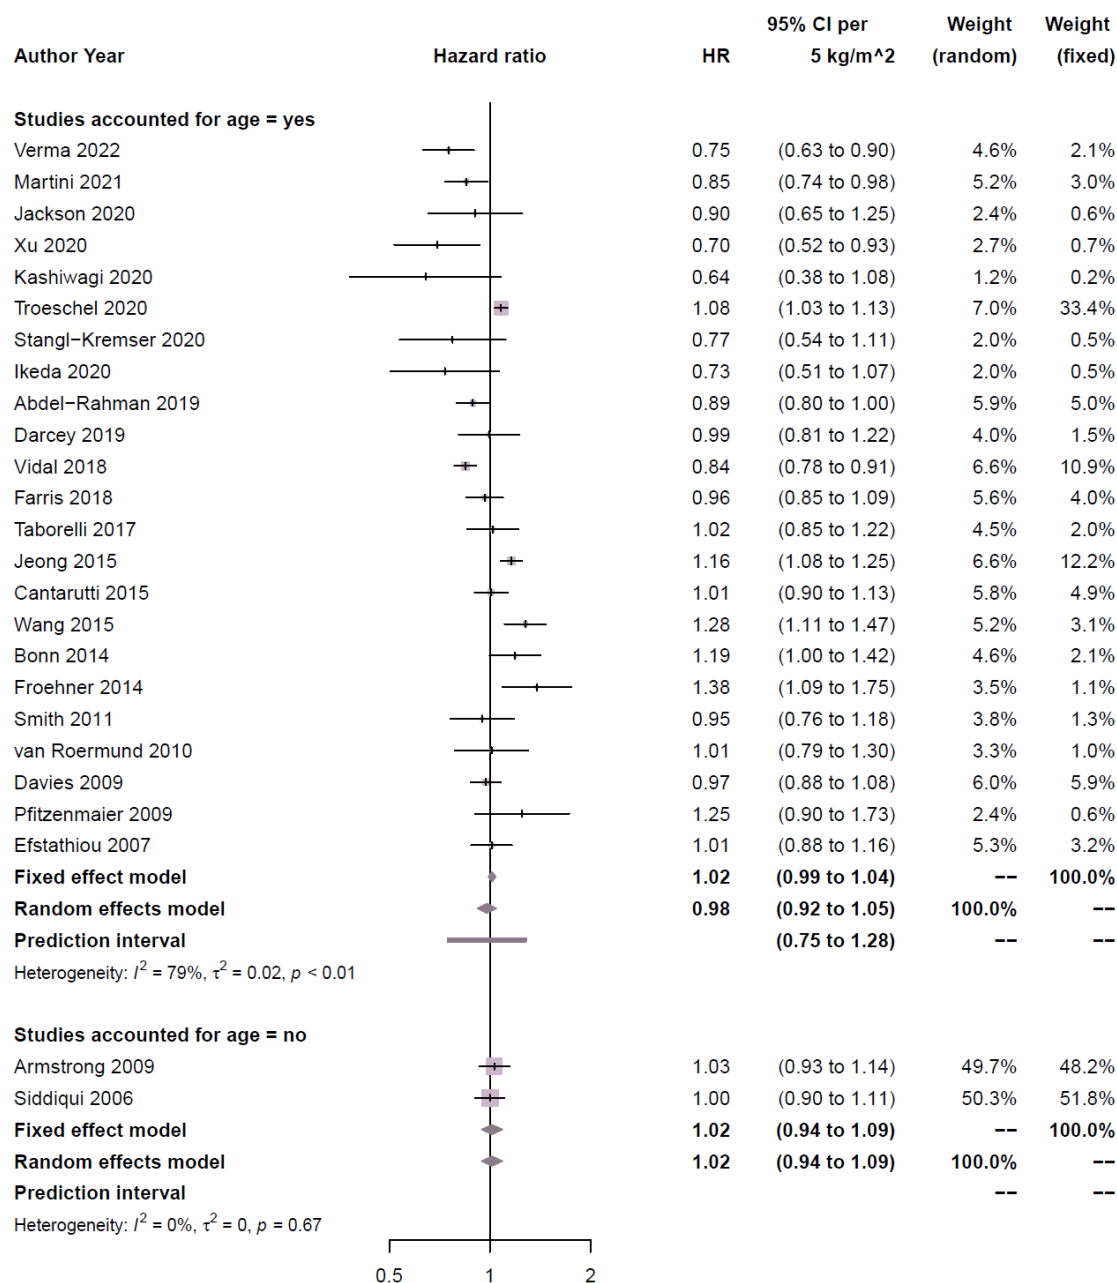

**Supplementary Figure 27 Summary hazard ratio estimate (95% CI) of all-cause mortality for post-diagnosis 5 kg/m<sup>2</sup> BMI increments by individual confounders: Accounted for stage (yes vs no).**

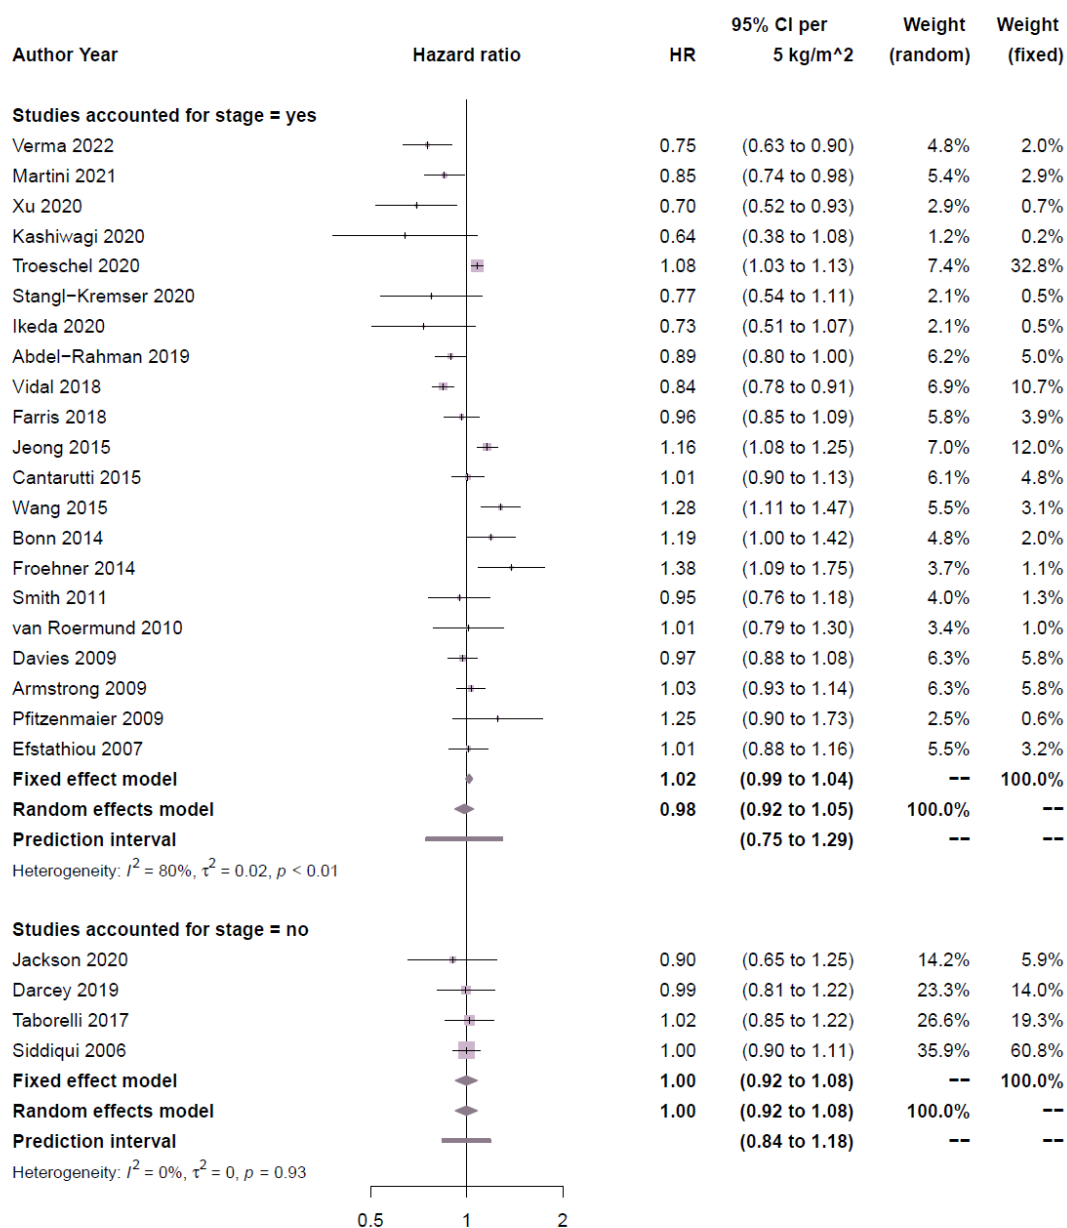

**Supplementary Figure 28 Summary hazard ratio estimate (95% CI) of all-cause mortality for post-diagnosis 5 kg/m<sup>2</sup> BMI increments by individual confounders: Accounted for Gleason score (yes vs no).**

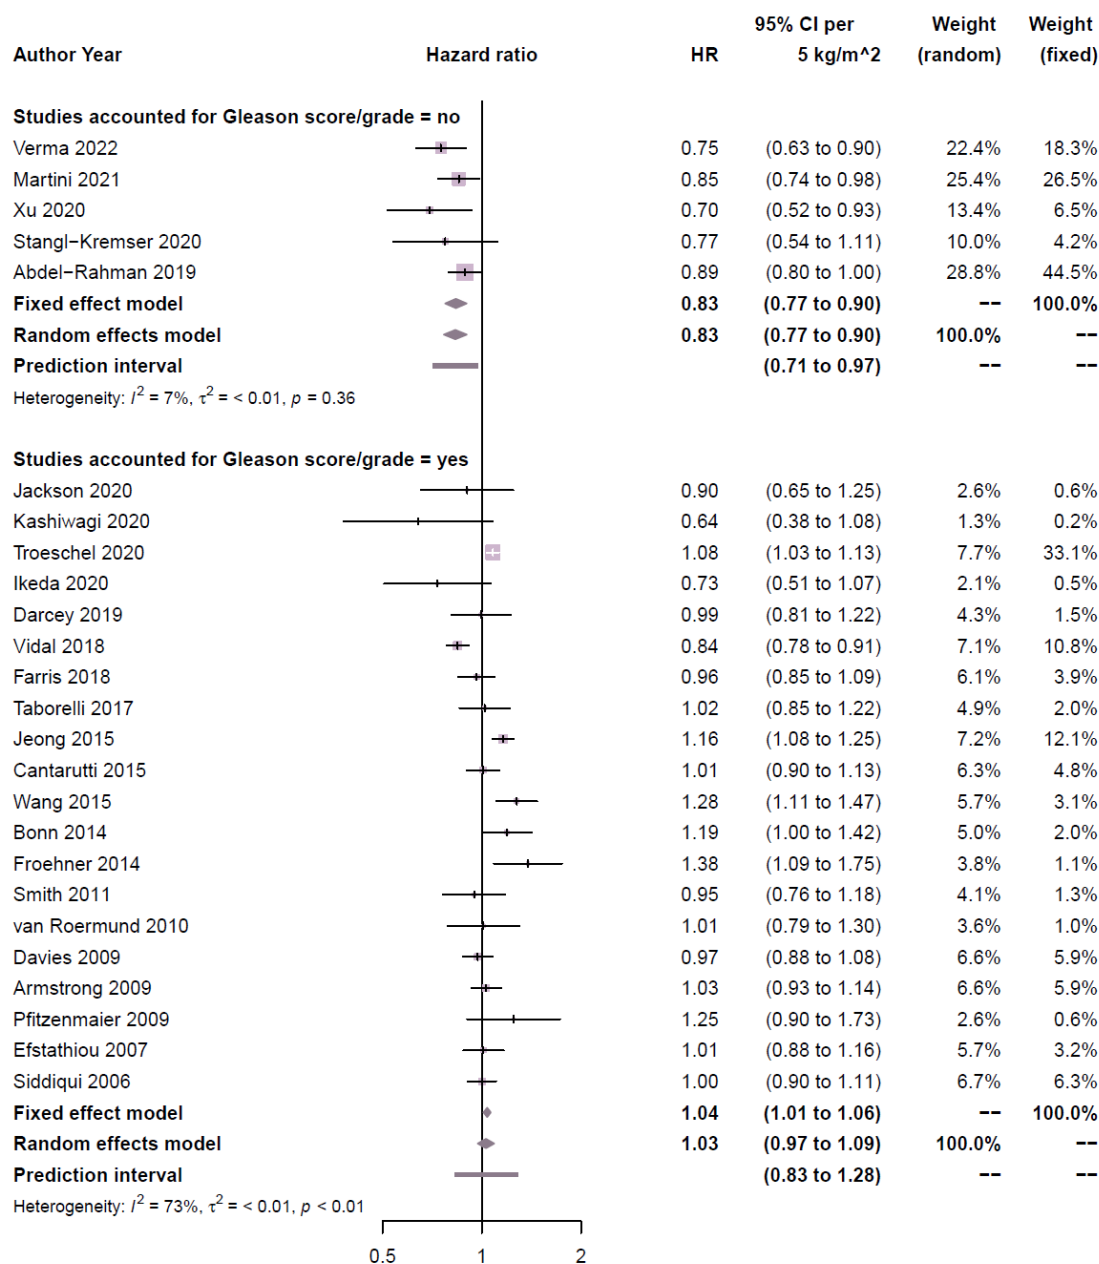

**Supplementary Figure 29 Summary hazard ratio estimate (95% CI) of all-cause mortality for post-diagnosis 5 kg/m<sup>2</sup> BMI increments by individual confounders: Accounted for treatments (yes vs no).**

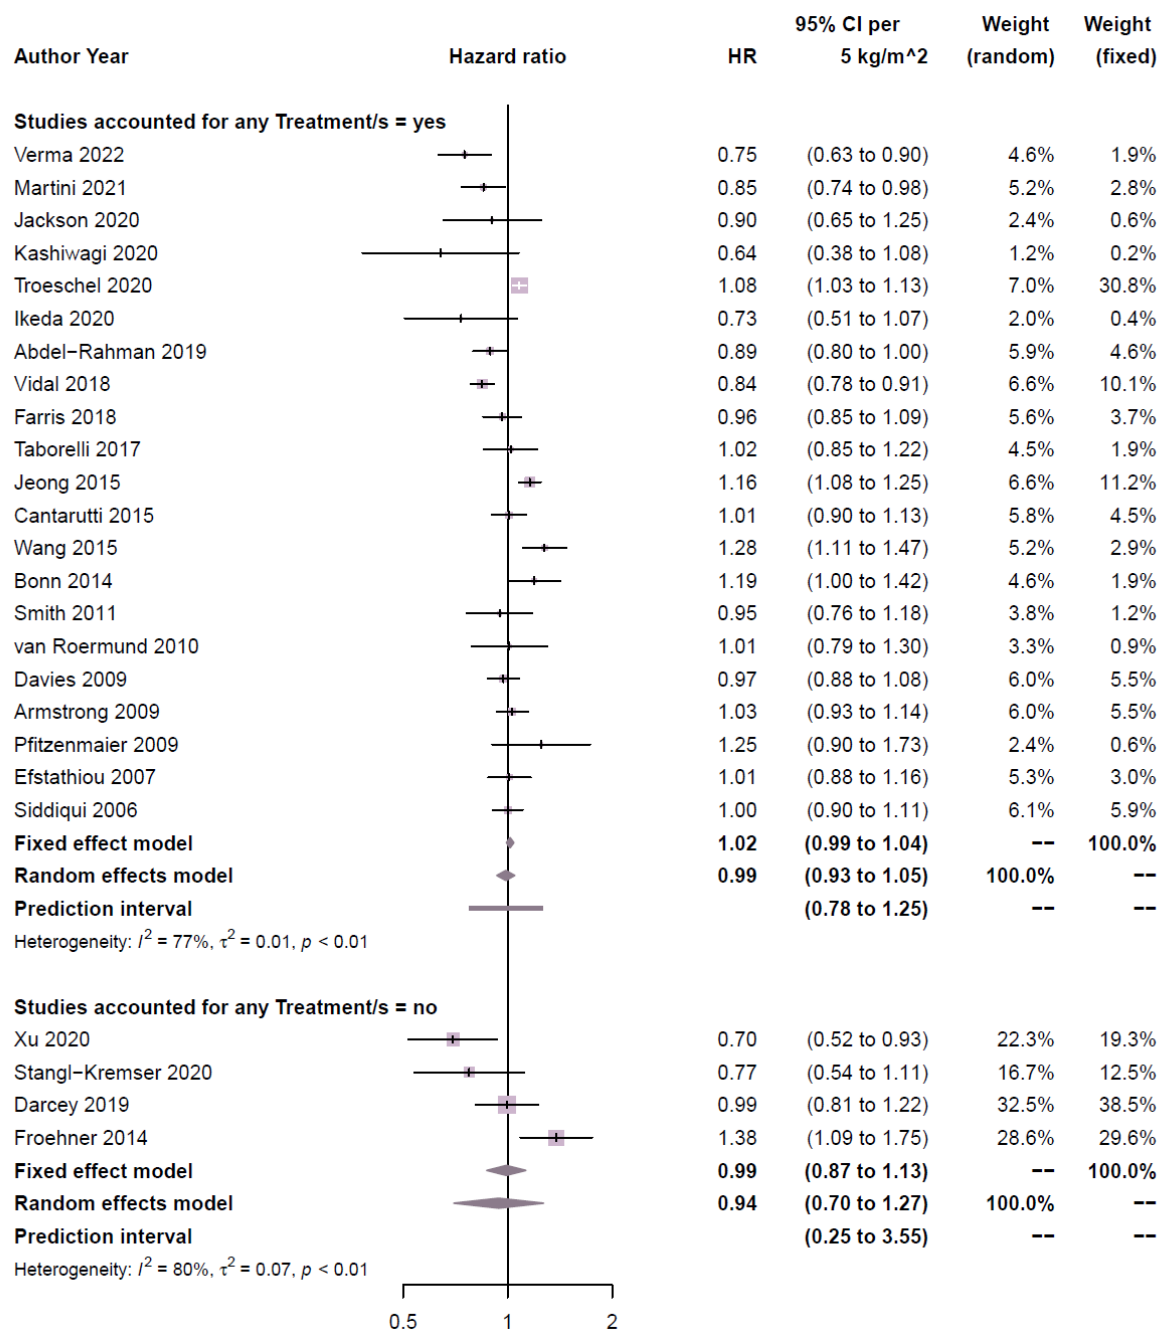

**Supplementary Figure 30 Summary hazard ratio estimate (95% CI) of all-cause mortality for post-diagnosis 5 kg/m<sup>2</sup> BMI increments by individual confounders: Accounted for smoking (yes vs no).**

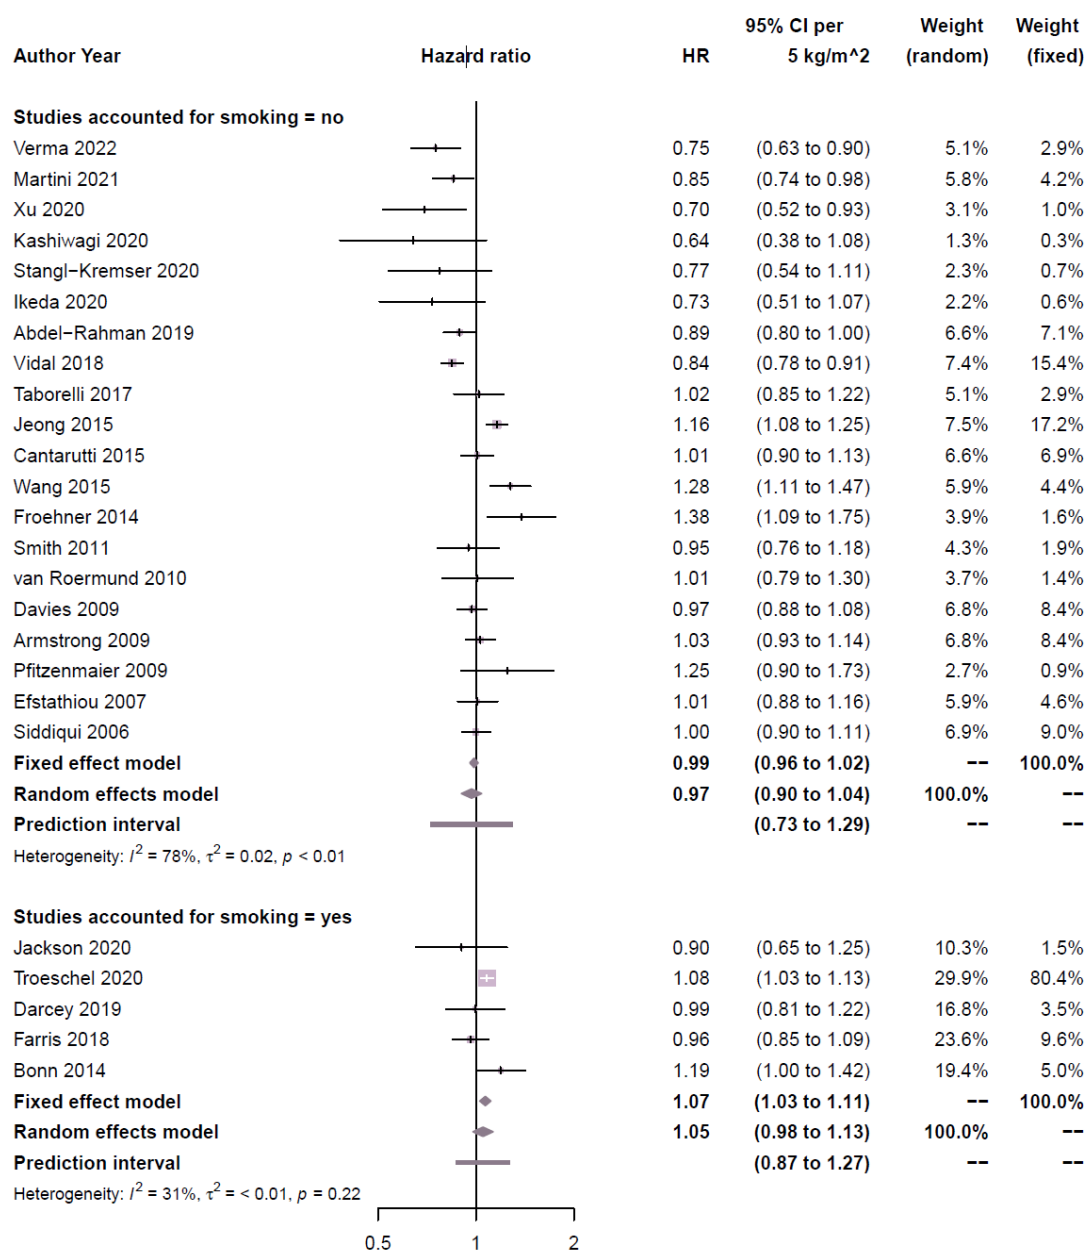

**Supplementary Figure 31 Summary hazard ratio estimate (95% CI) of all-cause mortality for post-diagnosis 5 kg/m<sup>2</sup> BMI increments by individual confounders: Accounted for PSA test/PSA levels (yes vs no).**

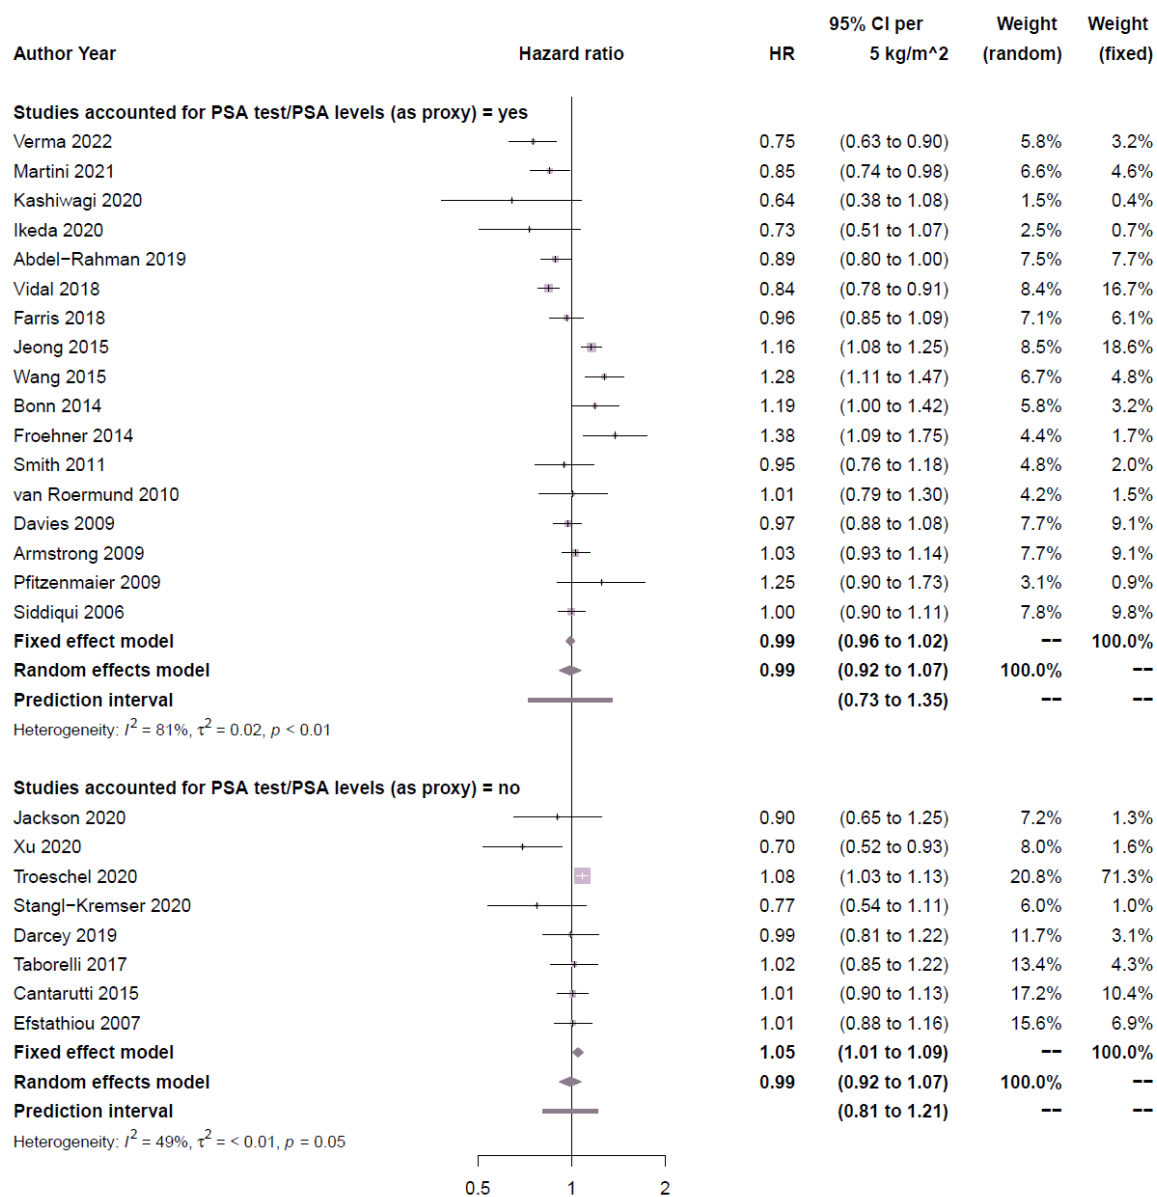



## Linear dose-response subgroup meta-analyses (BMI and PCa-specific mortality)

Supplementary Figure 32 Summary hazard ratio estimate (95% CI) of PCa-specific mortality for postdiagnosis 5 kg/m<sup>2</sup> BMI increments for A) studies that included underweight groups and B) studies that excluded the underweight groups.

**A**

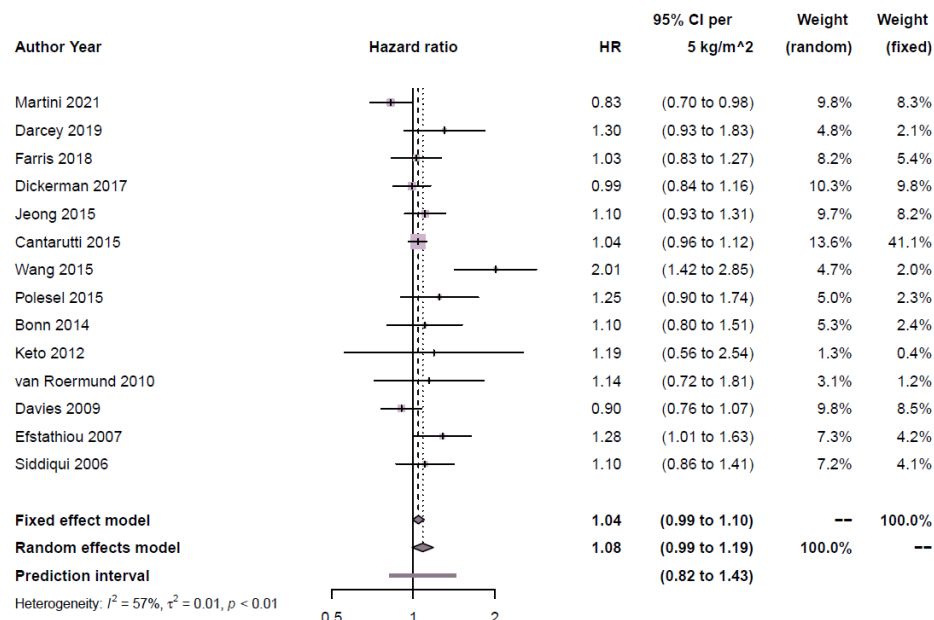

**B**

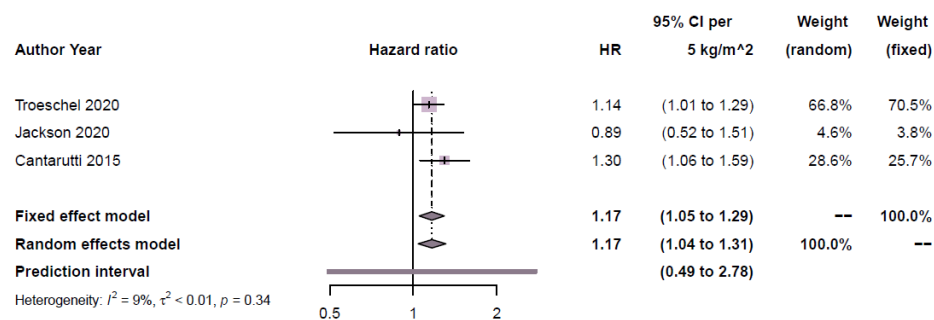

**Supplementary Figure 33 Summary hazard ratio estimate (95% CI) of PCa-specific mortality for post-diagnosis 5 kg/m<sup>2</sup> BMI increments by study design.**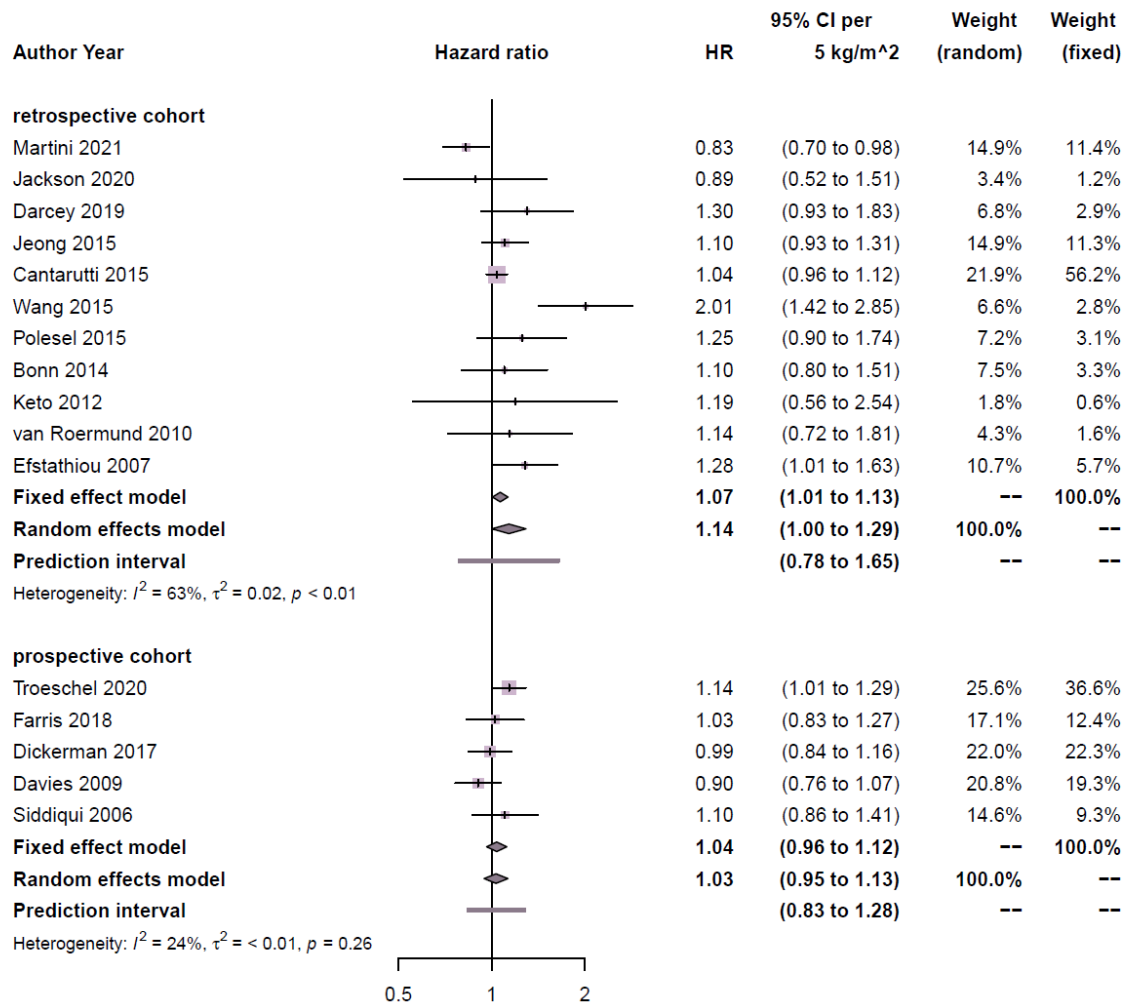

**Supplementary Figure 34 Summary hazard ratio estimate (95% CI) of PCa-specific mortality for post-diagnosis 5 kg/m<sup>2</sup> BMI increments by median deaths.**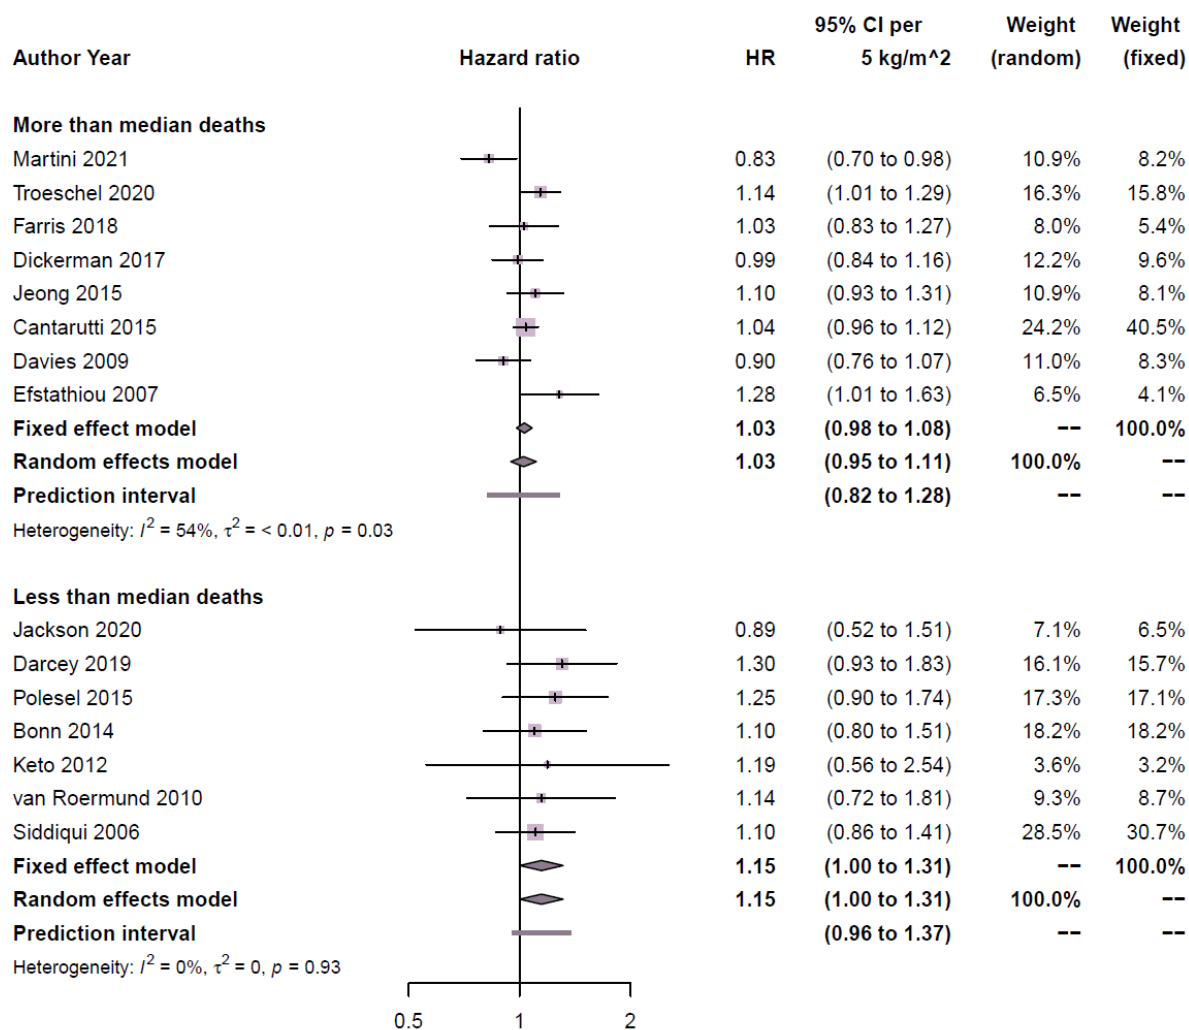

**Supplementary Figure 35 Summary hazard ratio estimate (95% CI) of PCa-specific mortality for post-diagnosis 5 kg/m<sup>2</sup> BMI increments by method of anthropometry assessment.**

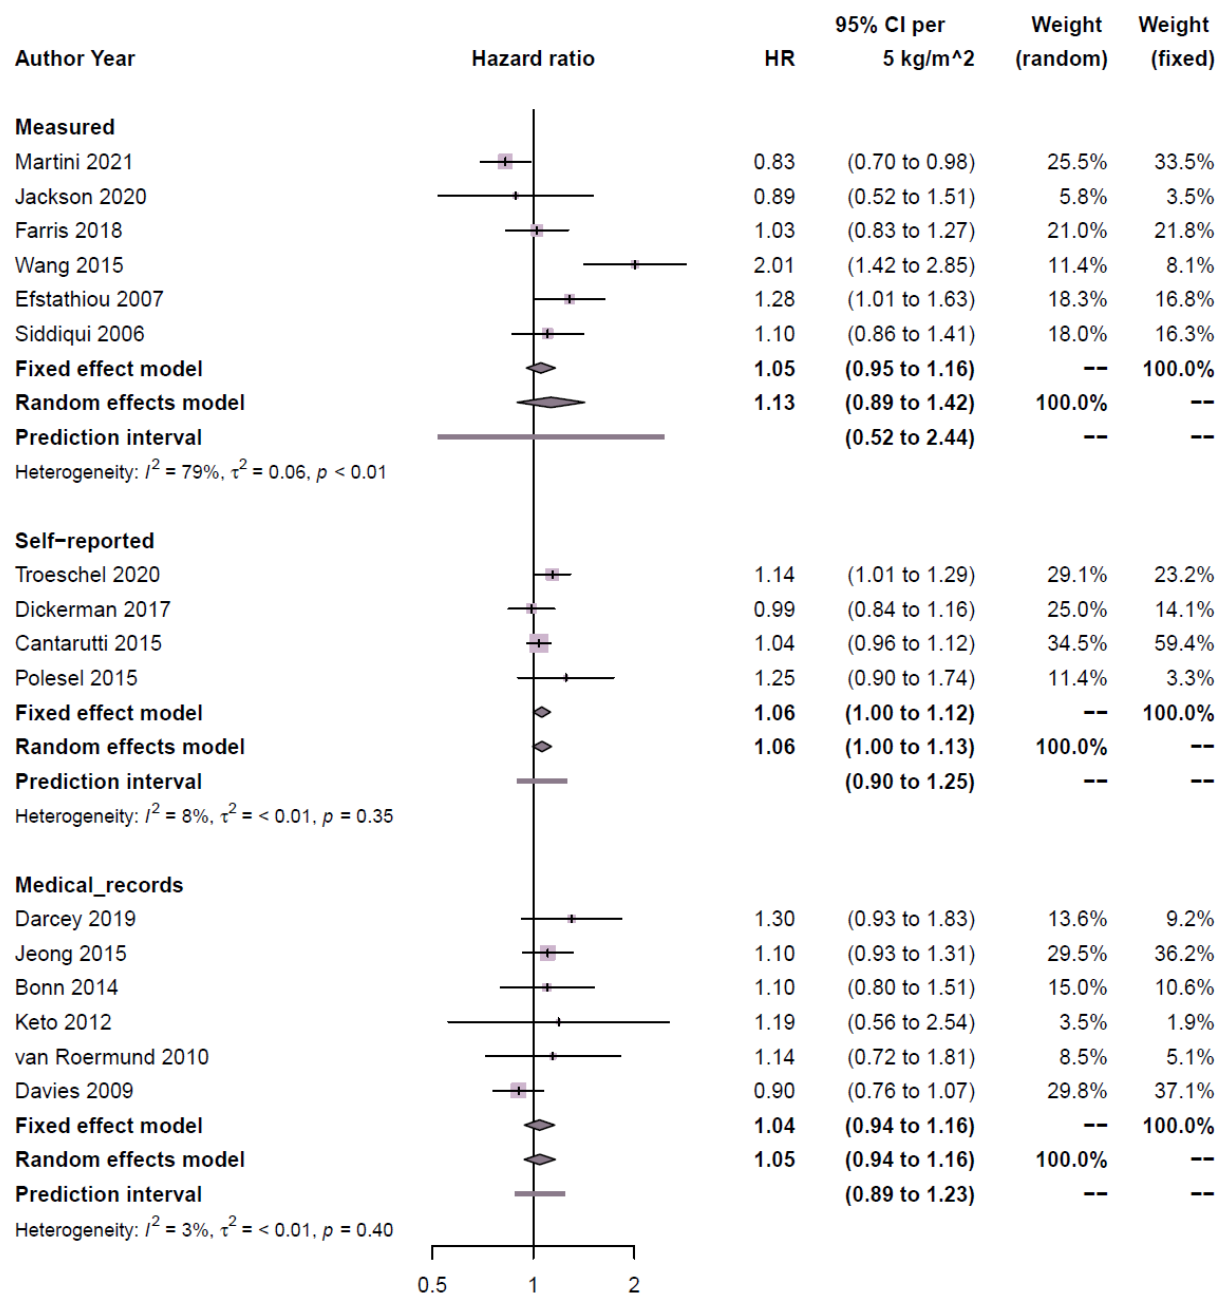

**Supplementary Figure 36 Summary hazard ratio estimate (95% CI) of PCa-specific mortality for post-diagnosis 5 kg/m<sup>2</sup> BMI increments by median follow-up (10 years).**

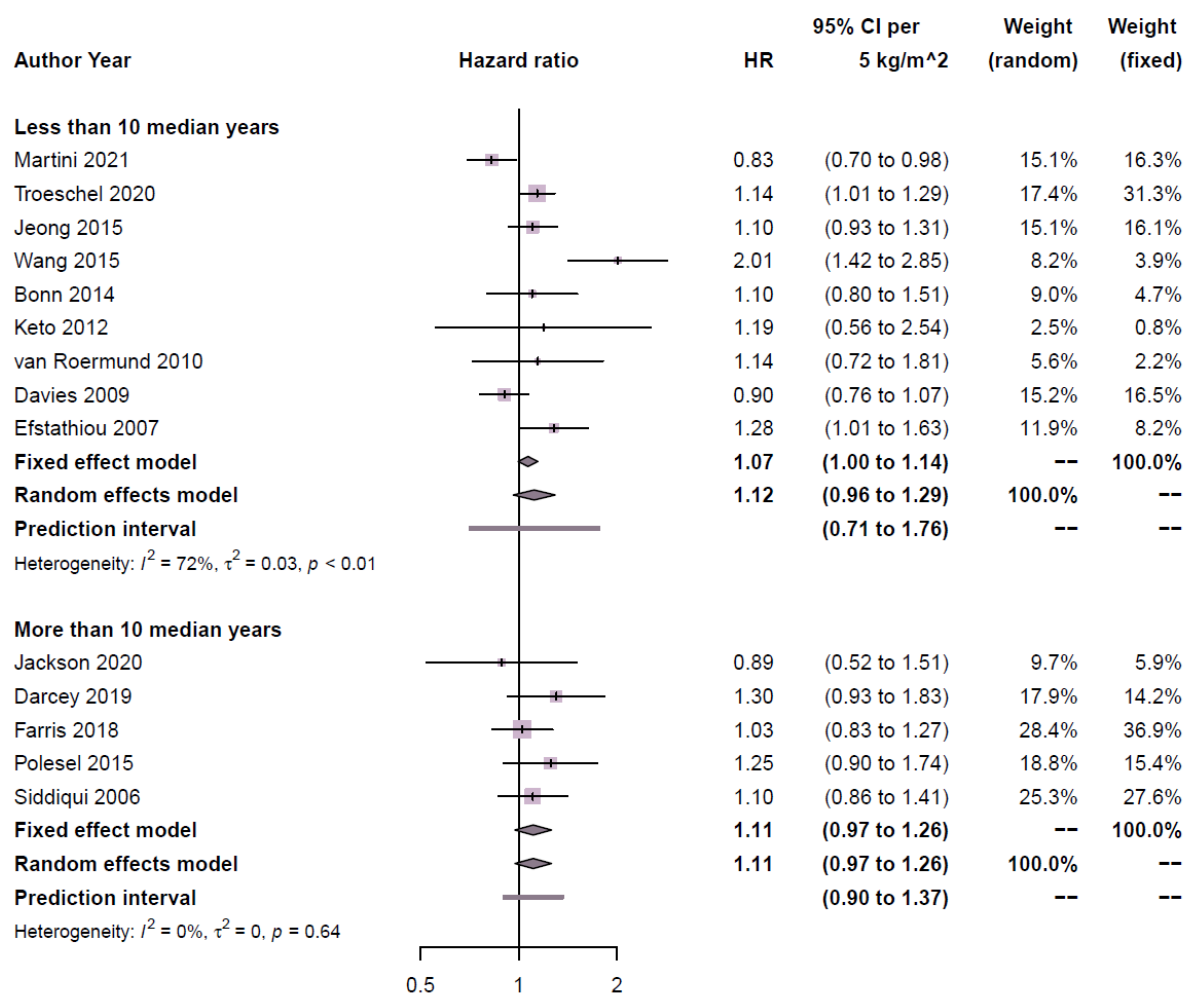

**Supplementary Figure 37 Summary hazard ratio estimate (95% CI) of PCa-specific mortality for post-diagnosis 5 kg/m<sup>2</sup> BMI increments by geographic location of study.**

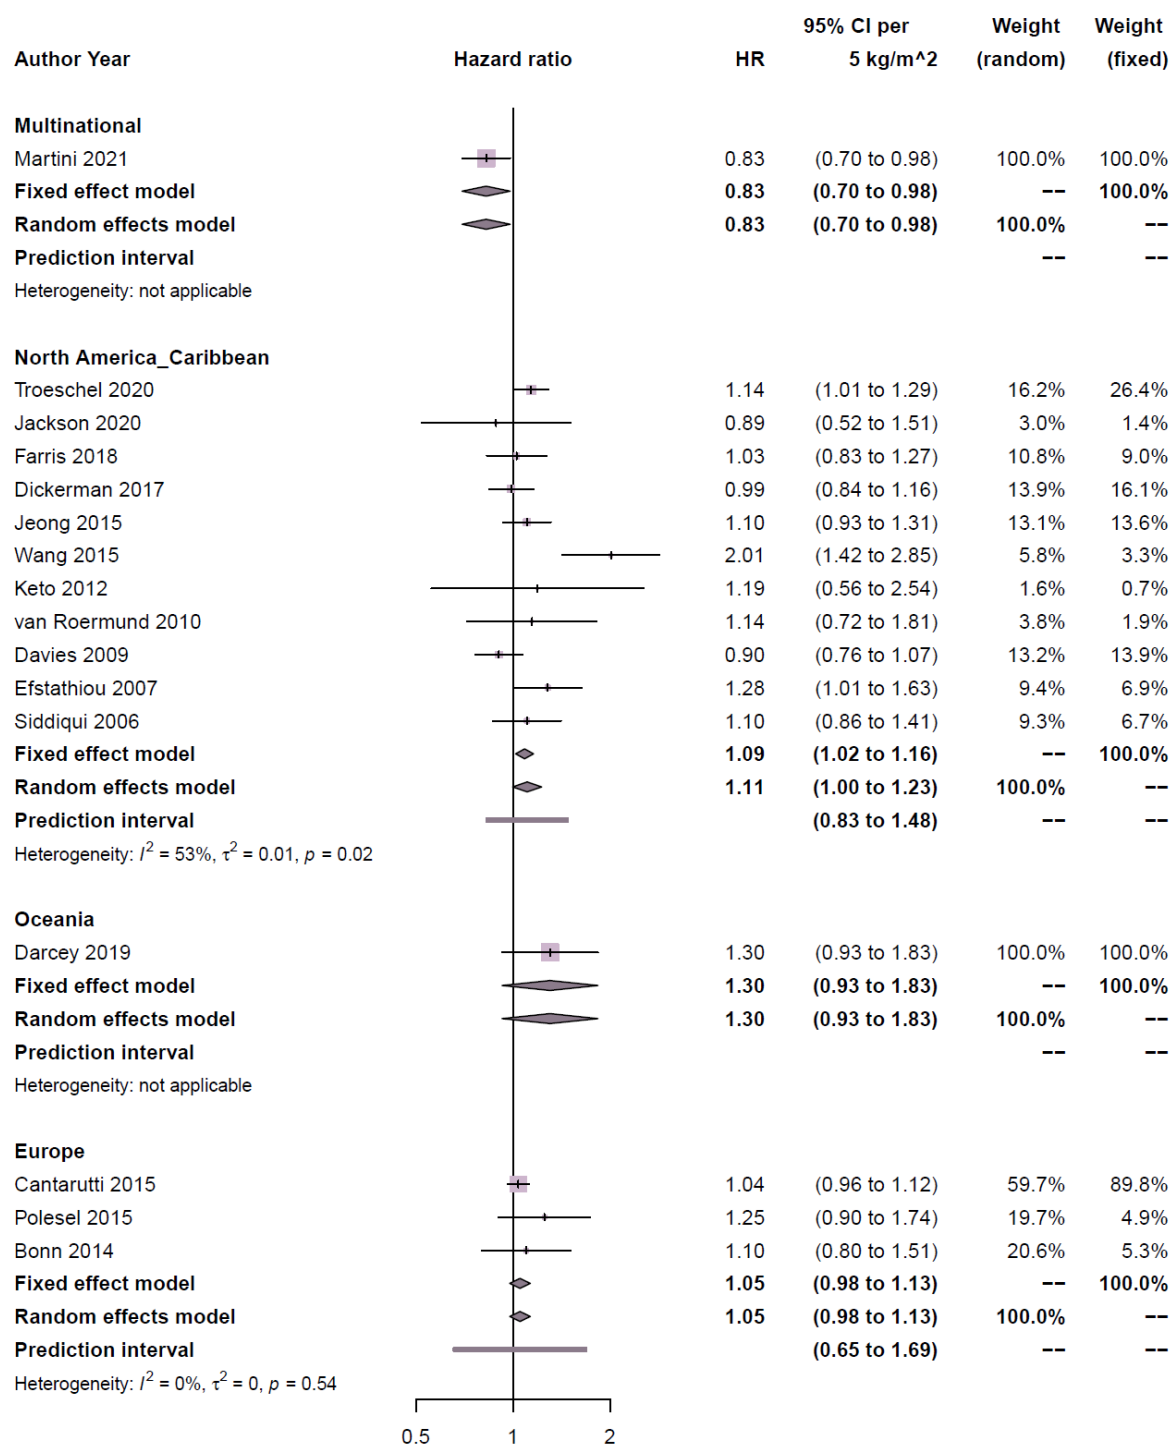

**Supplementary Figure 38 Summary hazard ratio estimate (95% CI) of PCa-specific mortality for post-diagnosis 5 kg/m<sup>2</sup> BMI increments by geographic location of study among the studies in “group 4” (advanced/metastatic).**

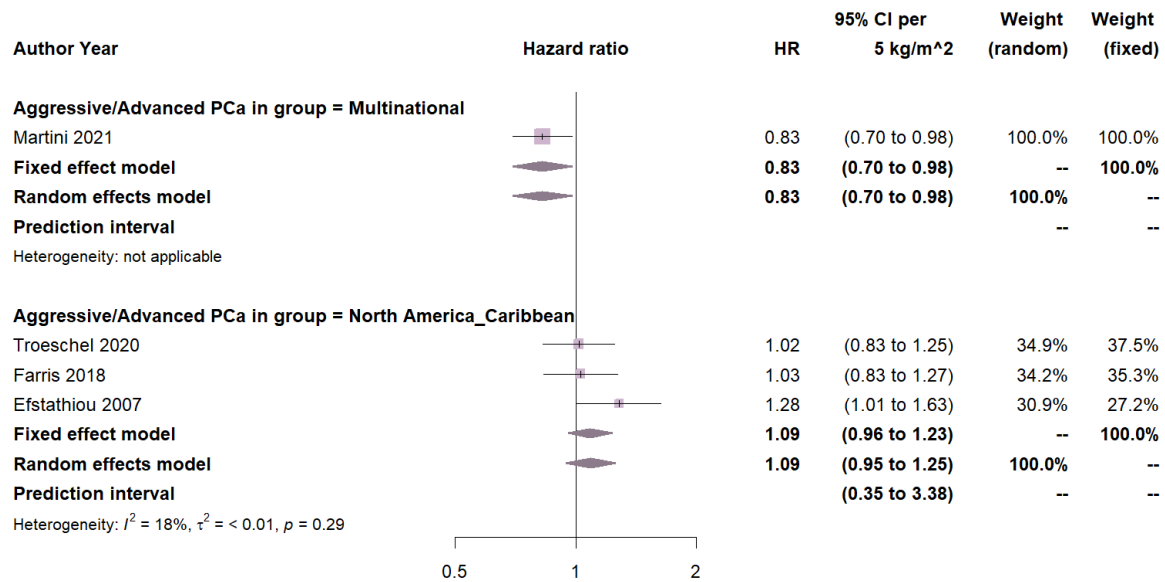

**Supplementary Figure 39 Summary hazard ratio estimate (95% CI) of PCa-specific mortality for post-diagnosis 5 kg/m<sup>2</sup> BMI increments by tumour risk groups (group one: low risk/early stage, group two: Mixed PCa i.e., low, and high risk could include metastatic or not, group three: Mixed PCa i.e., low, and high risk but state excludes advanced/metastatic, group four: Advanced/High risk PCa and could include metastatic.**

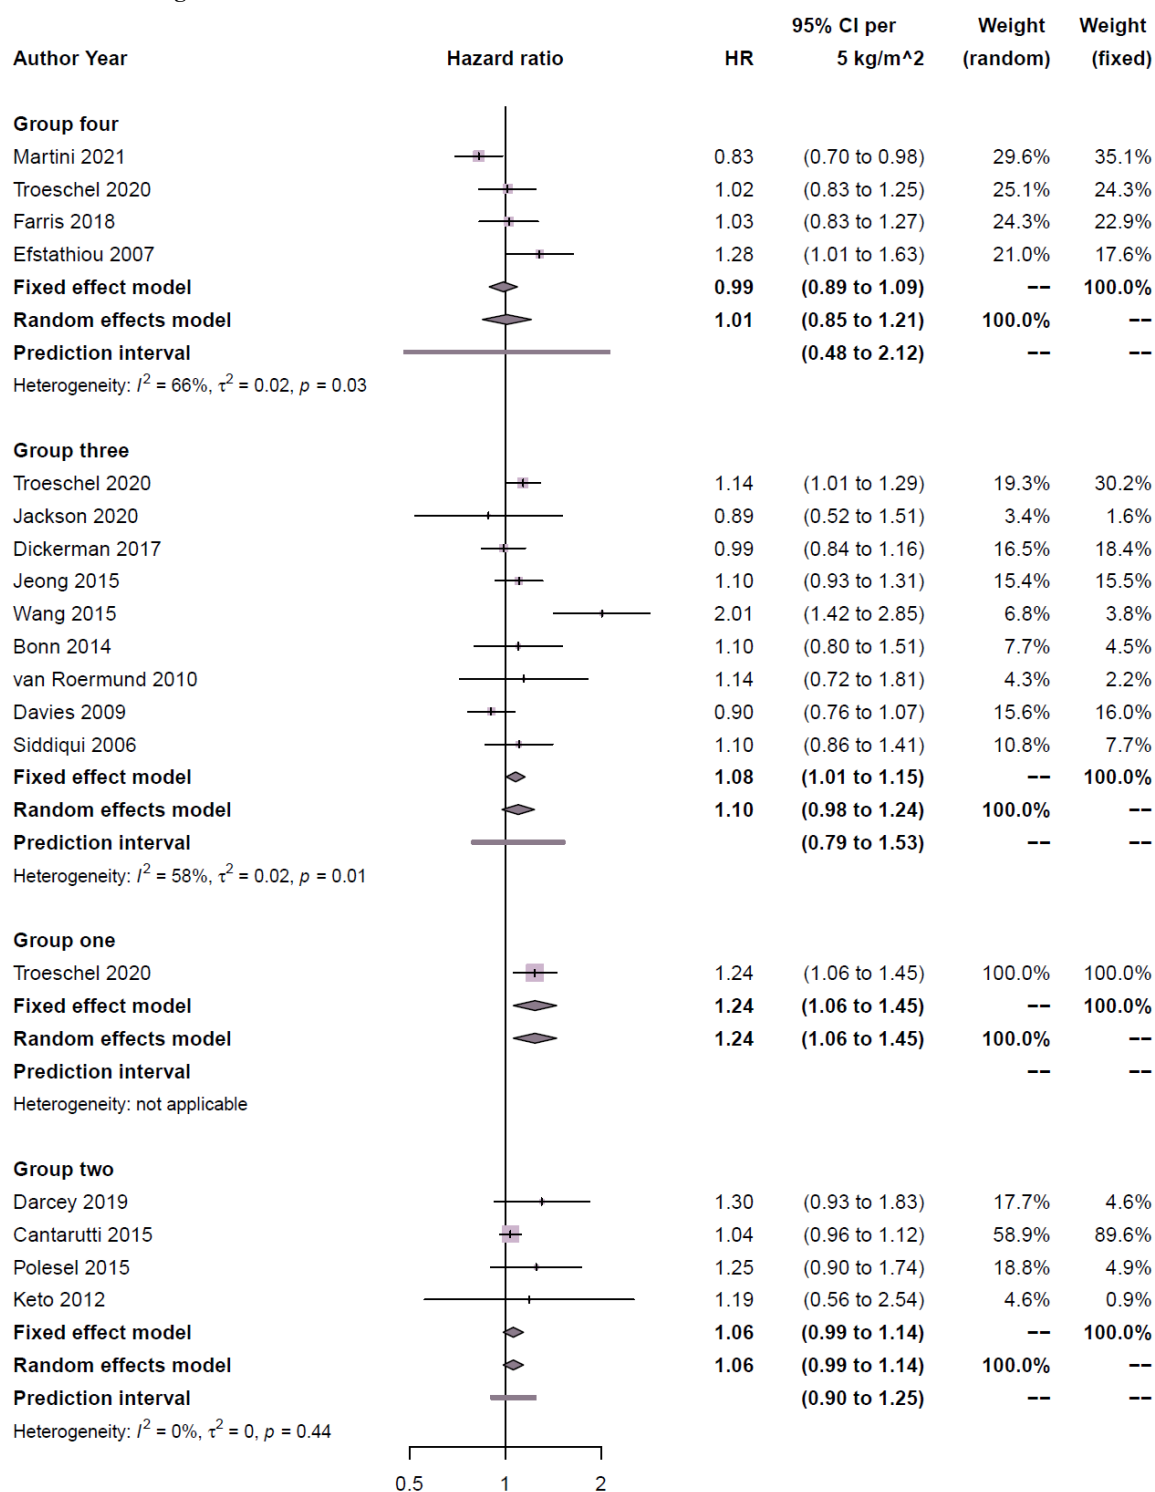



**Supplementary Figure 40 Summary hazard ratio estimate (95% CI) of PCa-specific mortality for post-diagnosis 5 kg/m<sup>2</sup> BMI increments for adjustment level one: adjusted at least for age, stage and grade (clinical risk/state).**

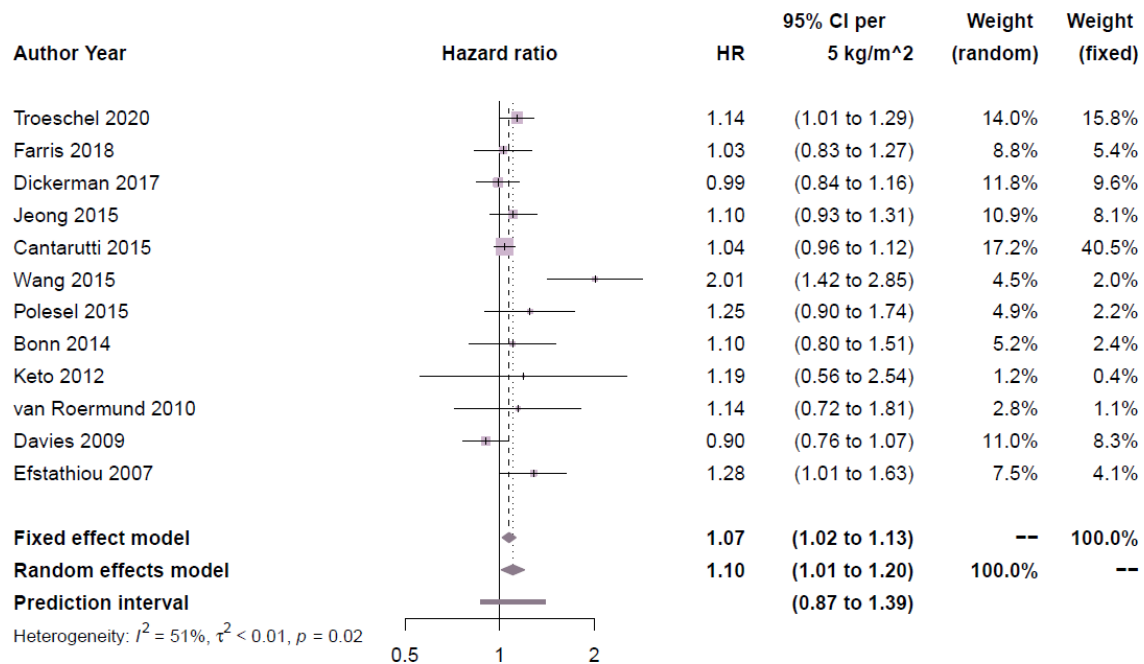

**Supplementary Figure 41 Summary hazard ratio estimate (95% CI) of PCa-specific mortality for post-diagnosis 5 kg/m<sup>2</sup> BMI increments for adjustment level two: adjusted at least for age, stage OR grade (clinical risk/state).**

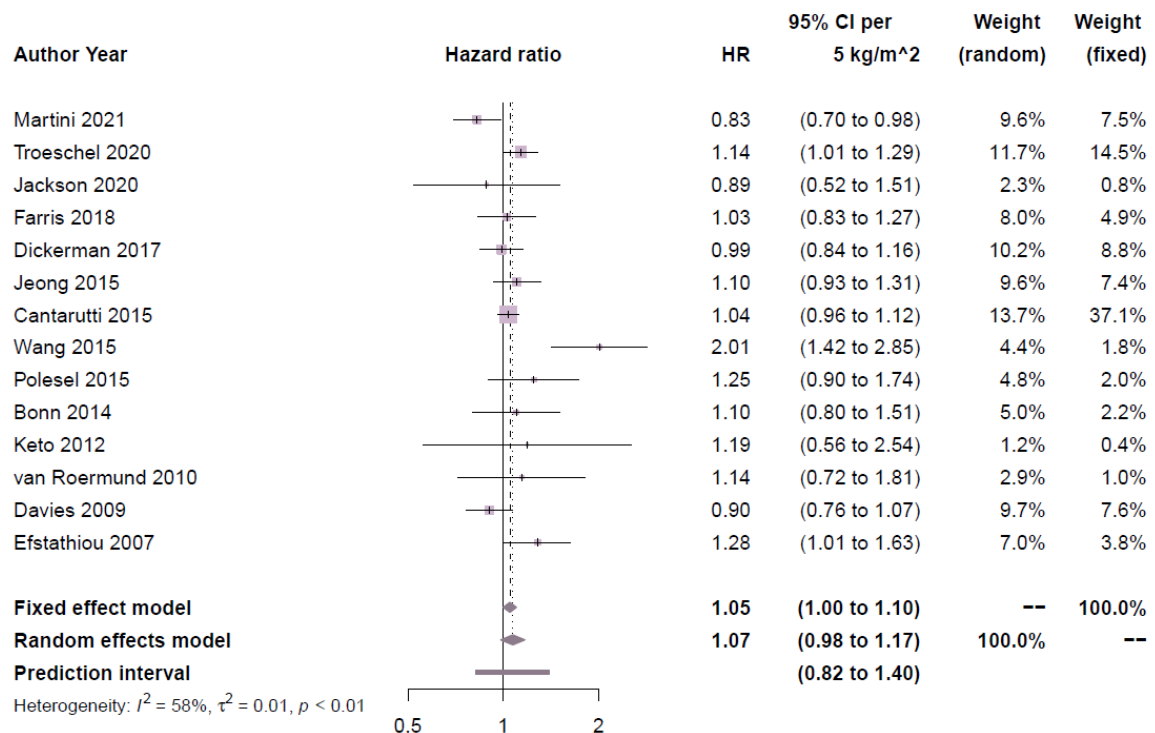

**Supplementary Figure 42 Summary hazard ratio estimate (95% CI) of PCa-specific mortality for post-diagnosis 5 kg/m<sup>2</sup> BMI increments for adjustment level three: adjusted at least for age, stage, grade (clinical risk/state) and treatment (any).**

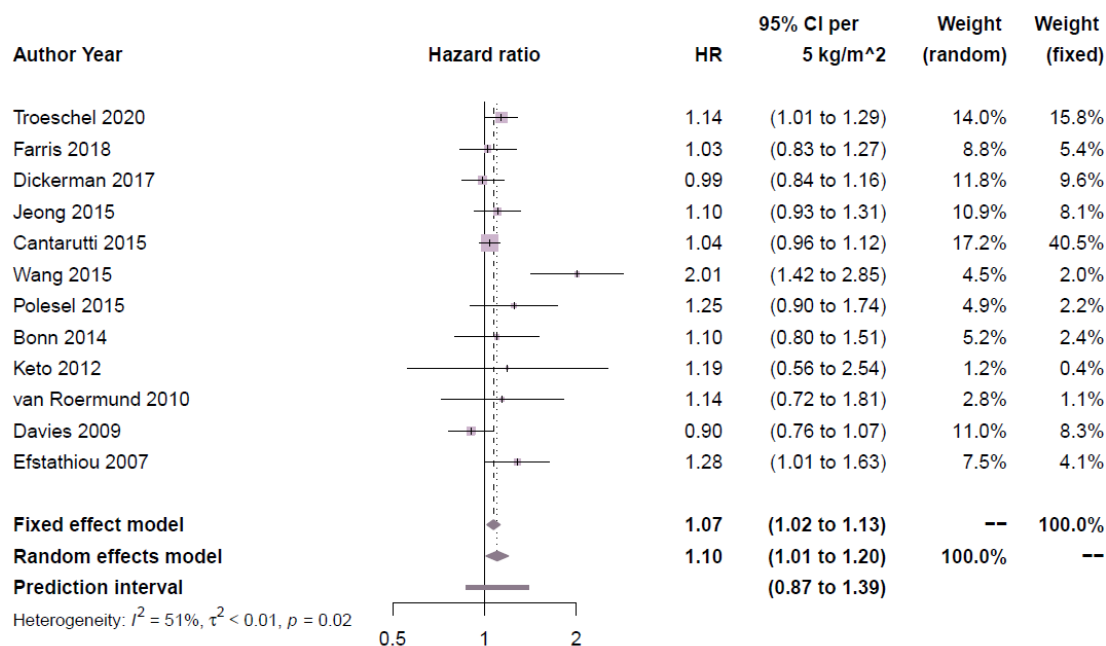

**Supplementary Figure 43 Summary hazard ratio estimate (95% CI) of PCa-specific mortality for post-diagnosis 5 kg/m<sup>2</sup> BMI increments for adjustment level four: age, stage, grade (clinical risk/state), treatment (any) and smoking.**

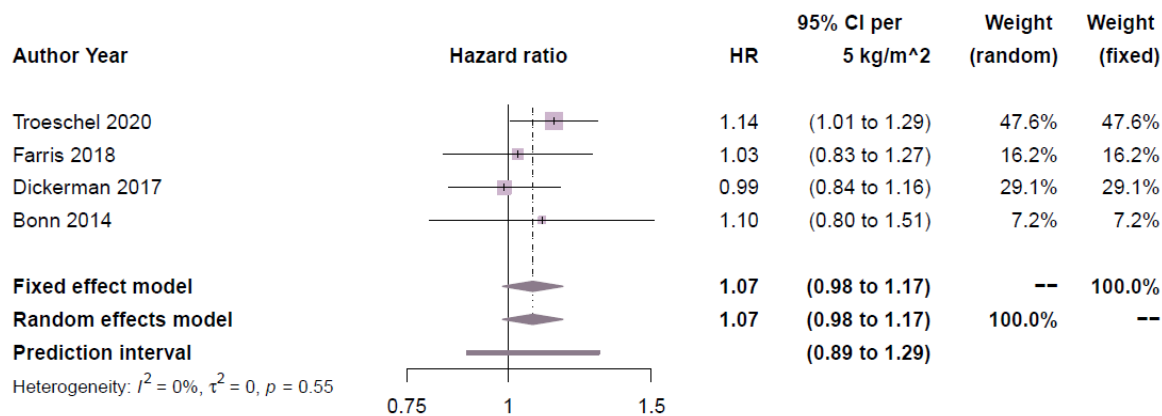

**Supplementary Figure 44 Summary hazard ratio estimate (95% CI) of PCa-specific mortality for post-diagnosis 5 kg/m<sup>2</sup> BMI increments for adjustment level five: age, stage, grade, treatment (any), smoking and PSA test (PSA levels as proxy).**

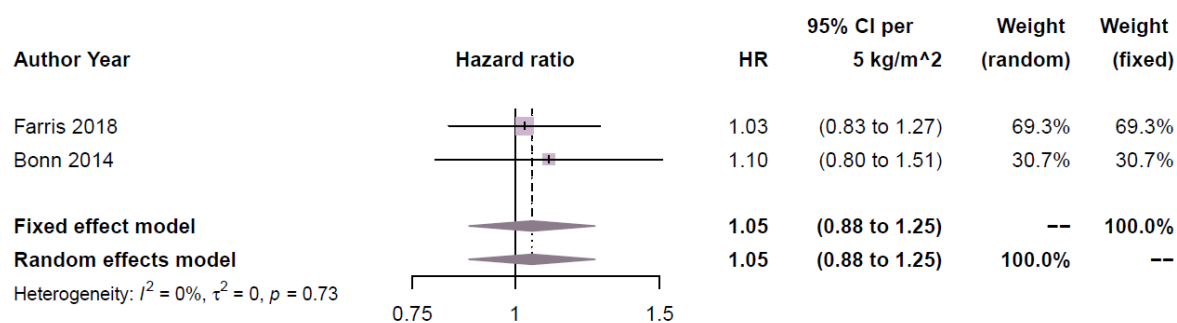

**Supplementary Figure 45 Summary hazard ratio estimate (95% CI) of PCa-specific mortality for post-diagnosis 5 kg/m<sup>2</sup> BMI increments by individual confounders: Accounted for age (yes vs no).**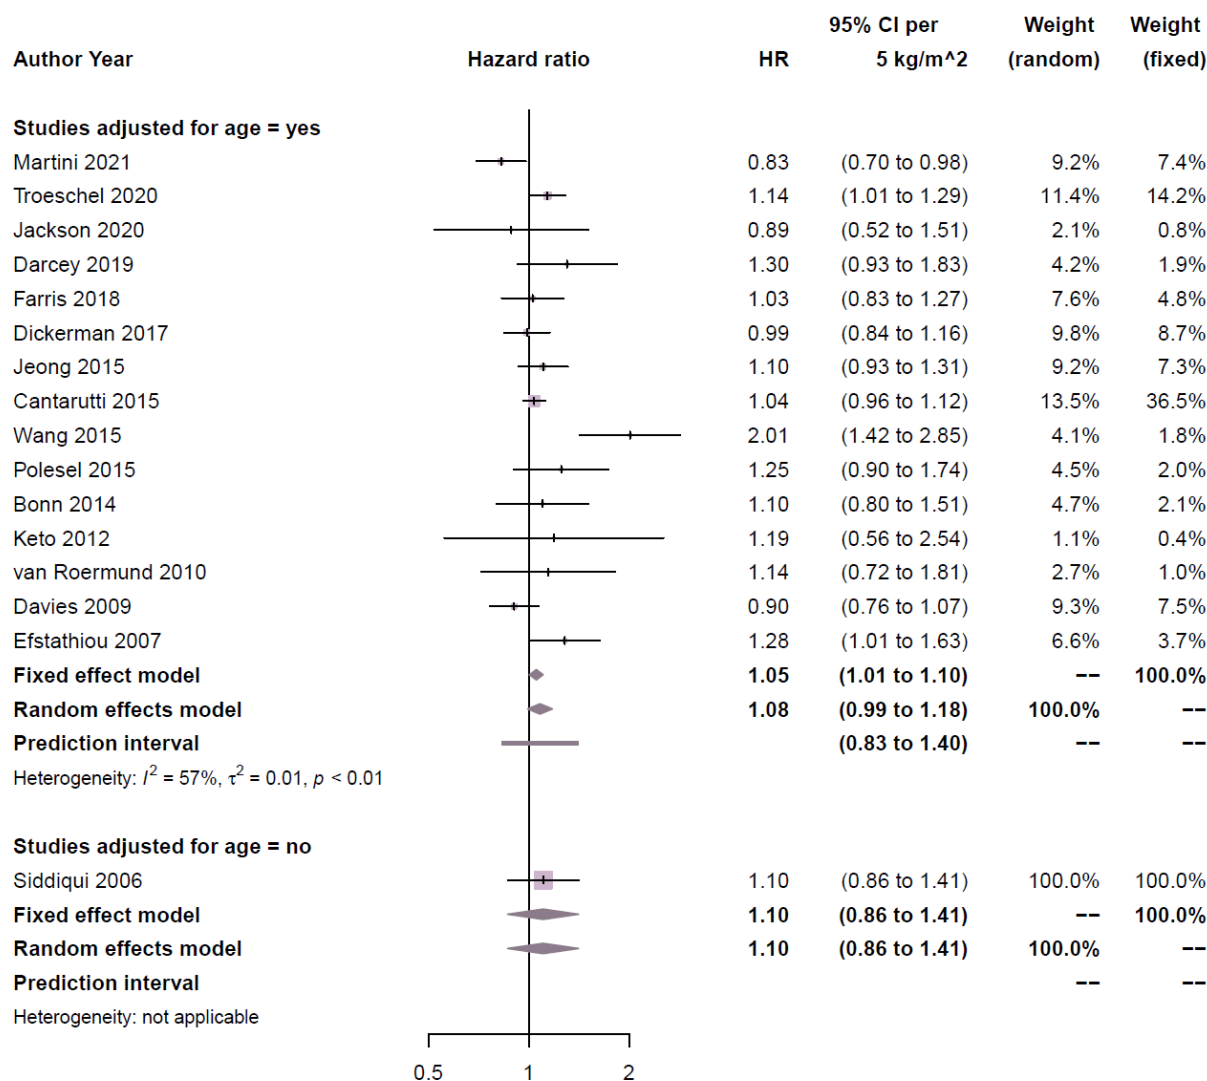

**Supplementary Figure 46 Summary hazard ratio estimate (95% CI) of PCa-specific mortality for post-diagnosis 5 kg/m<sup>2</sup> BMI increments by individual confounders: Accounted for stage (yes vs no).**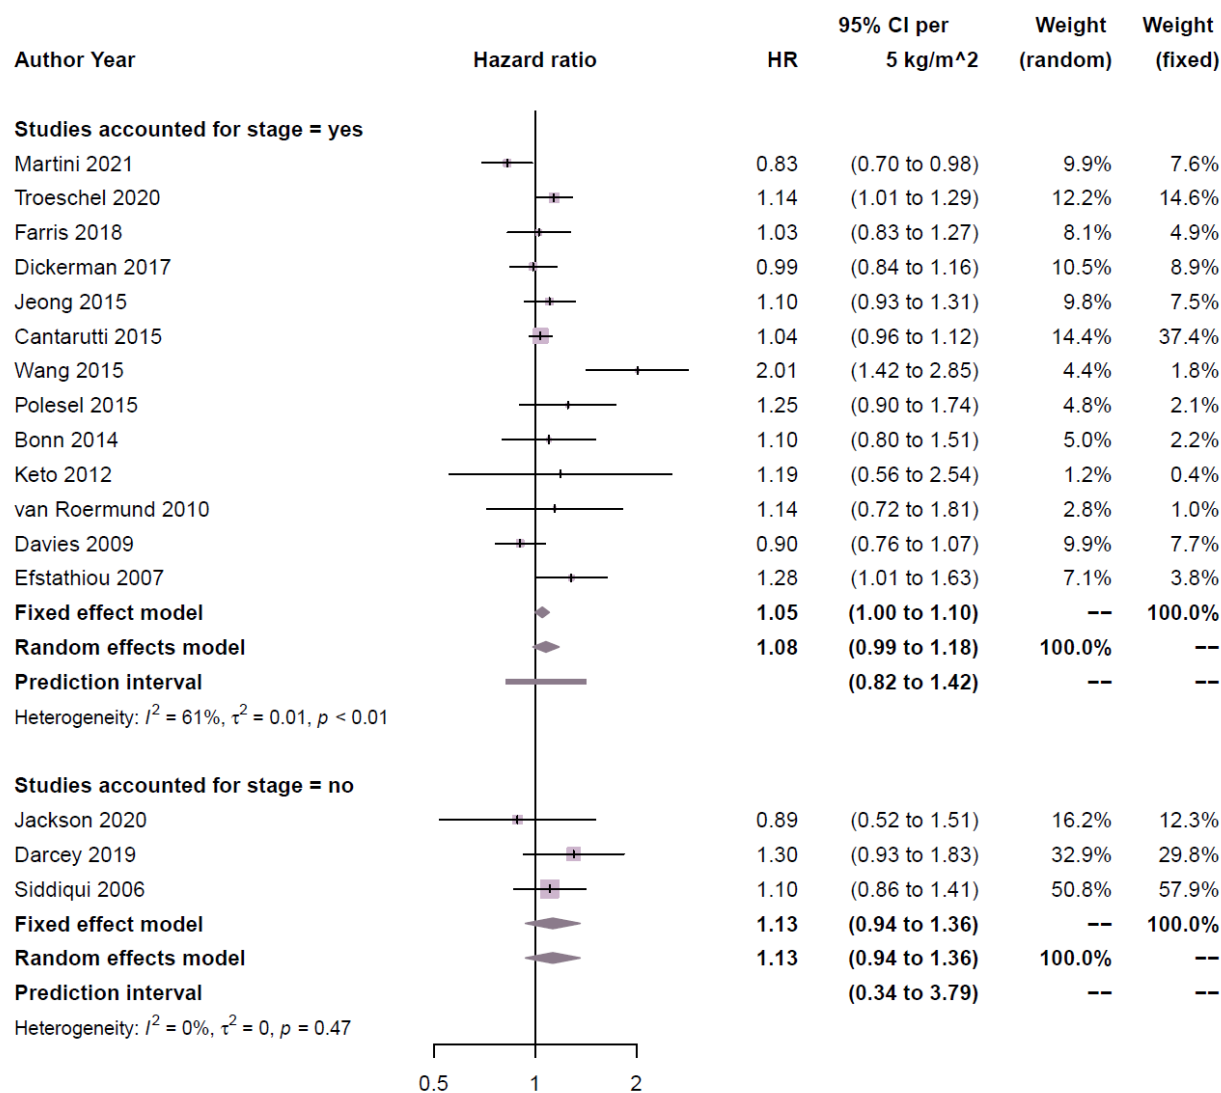

**Supplementary Figure 47 Summary hazard ratio estimate (95% CI) of PCa-specific mortality for post-diagnosis 5 kg/m<sup>2</sup> BMI increments by individual confounders: Accounted for Gleason score (yes vs no).**

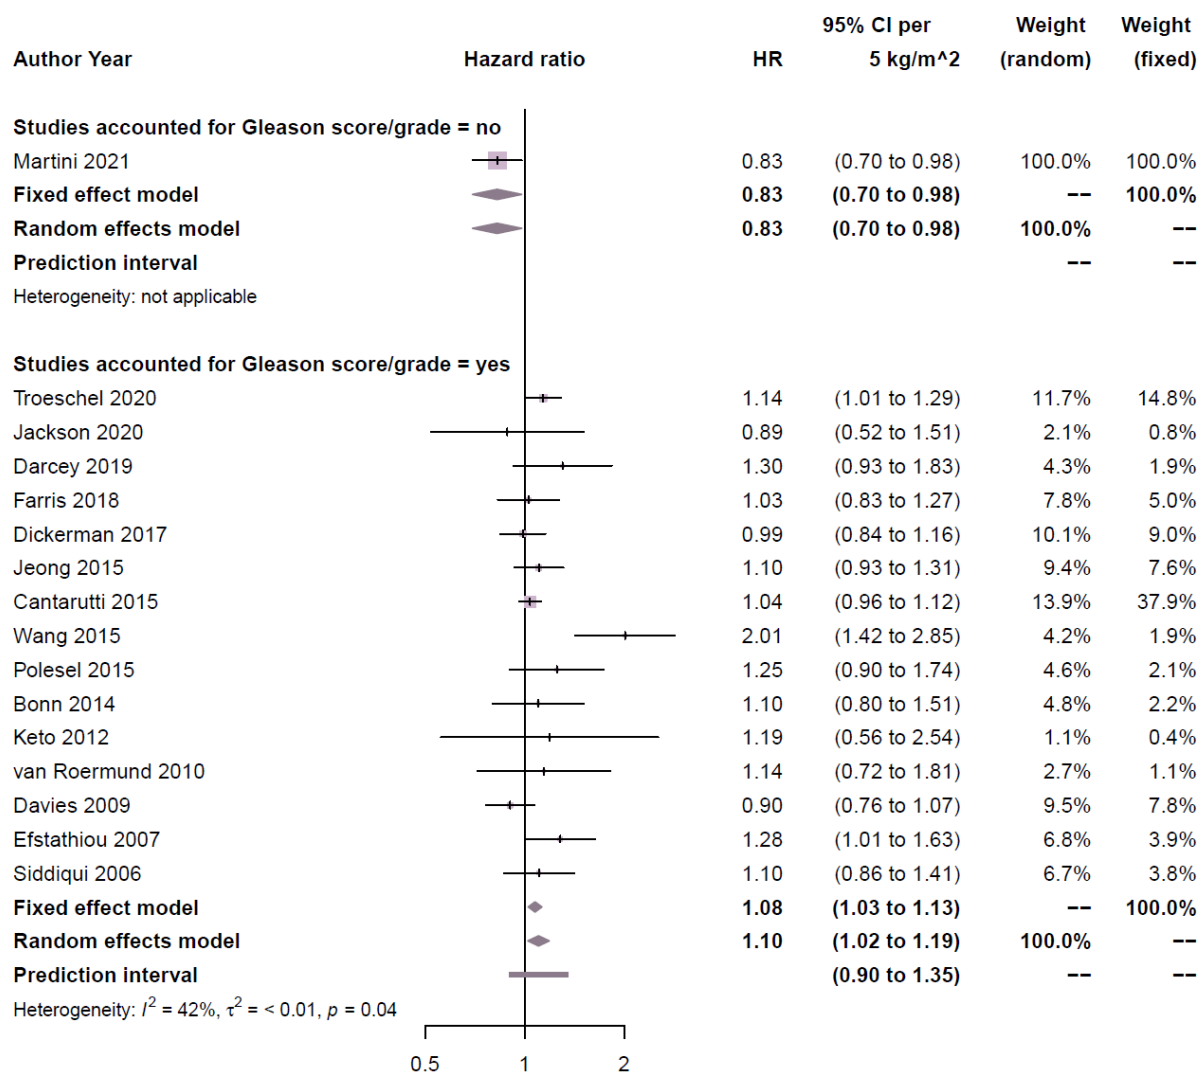

**Supplementary Figure 48 Summary hazard ratio estimate (95% CI) of PCa-specific mortality for post-diagnosis 5 kg/m<sup>2</sup> BMI increments by individual confounders: Accounted for treatments (yes vs no).**

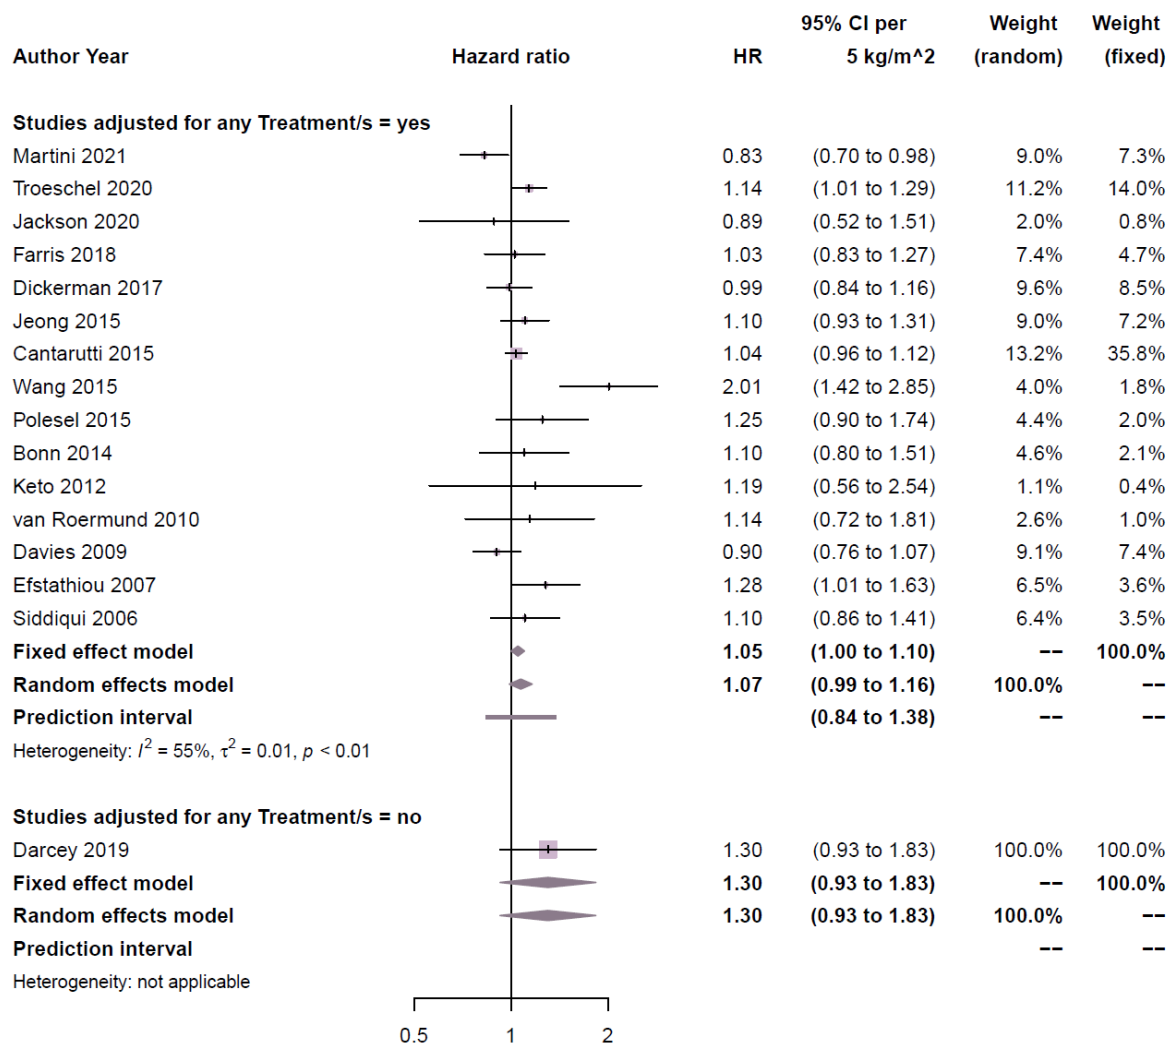

**Supplementary Figure 49 Summary hazard ratio estimate (95% CI) of PCa-specific mortality for post-diagnosis 5 kg/m<sup>2</sup> BMI increments by individual confounders: Accounted for smoking (yes vs no).**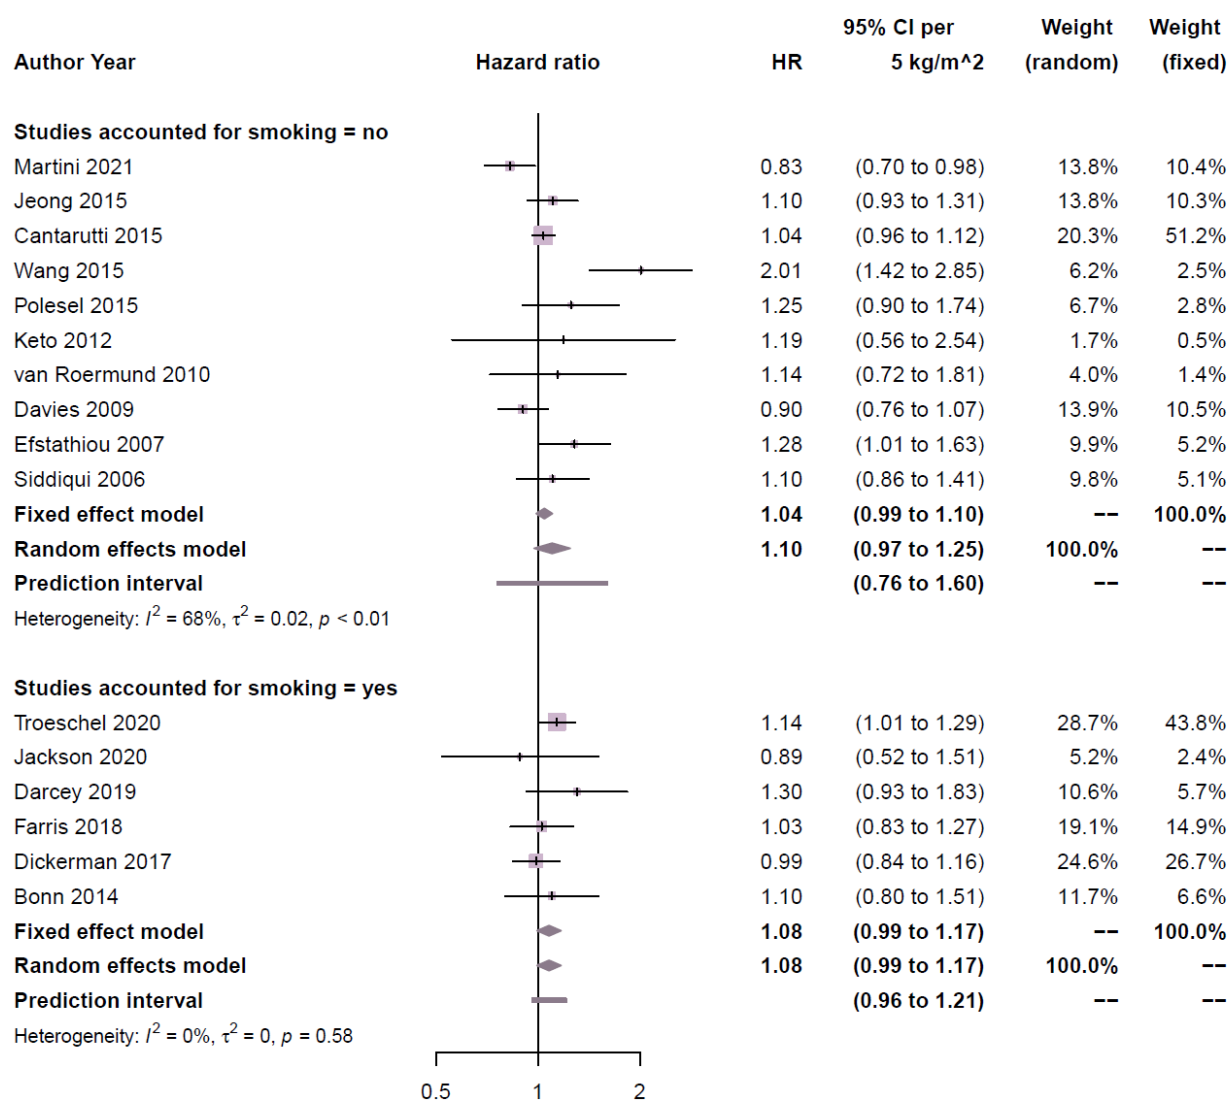

**Supplementary Figure 50 Summary hazard ratio estimate (95% CI) of PCa-specific mortality for post-diagnosis 5 kg/m<sup>2</sup> BMI increments by individual confounders: Accounted for PSA test/PSA levels (yes vs no).**

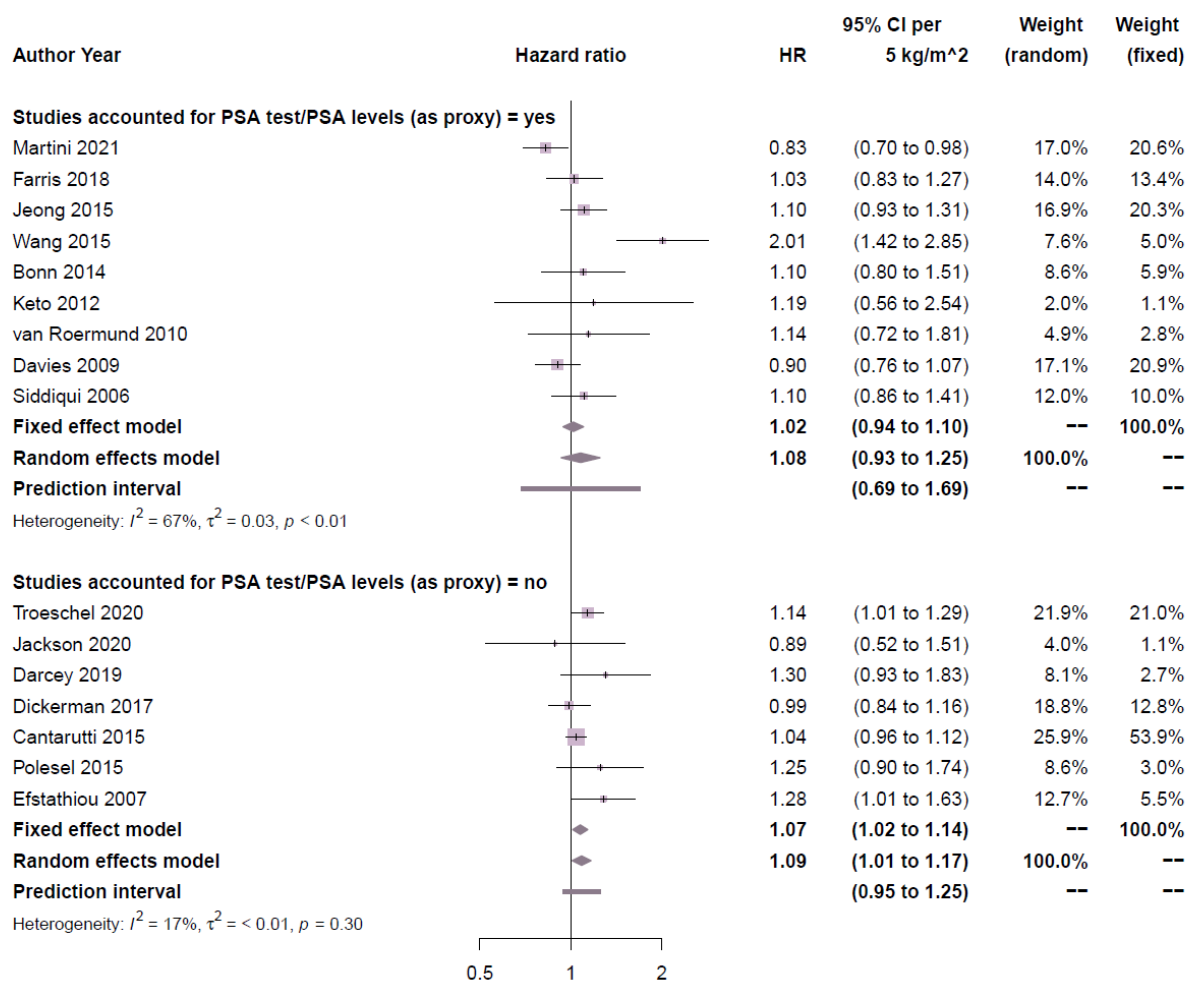



## Waist circumference and all-cause and PCa-specific mortality

Supplementary Figure 51 Summary hazard ratio estimate (95% CI) for post-diagnosis 10 cm increments of waist circumference for A) all-cause mortality and B) PCa-specific mortality.

**A**

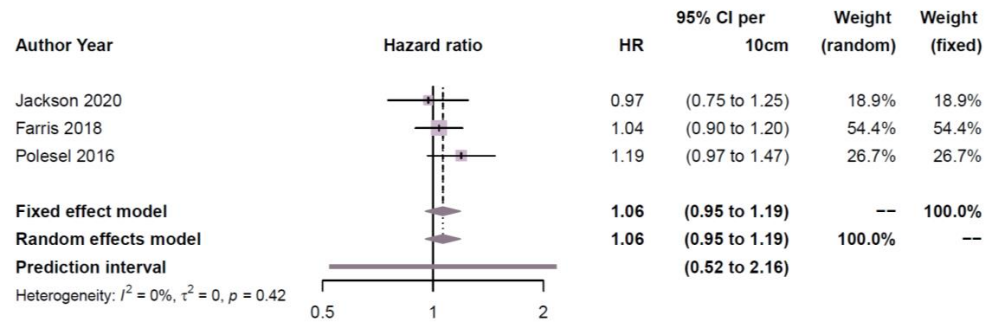

**B**

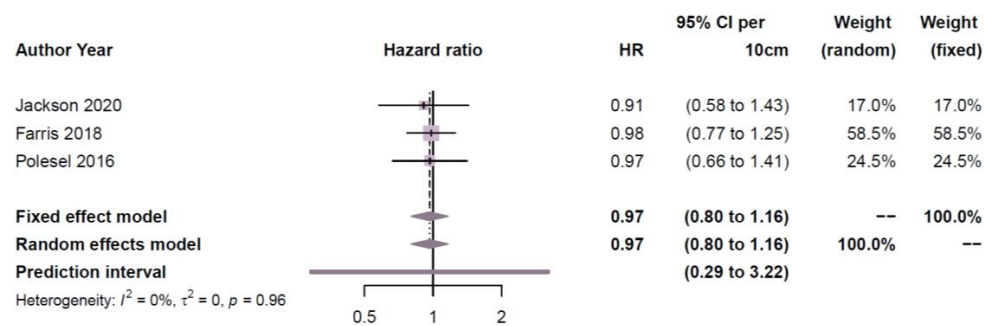

**Supplementary Figure 52 Non-Linear association between waist-circumference and A) all-cause mortality and B) PCa-specific mortality. Estimated trend of the natural logarithm of HR according to the level of waist-circumference in each study.**

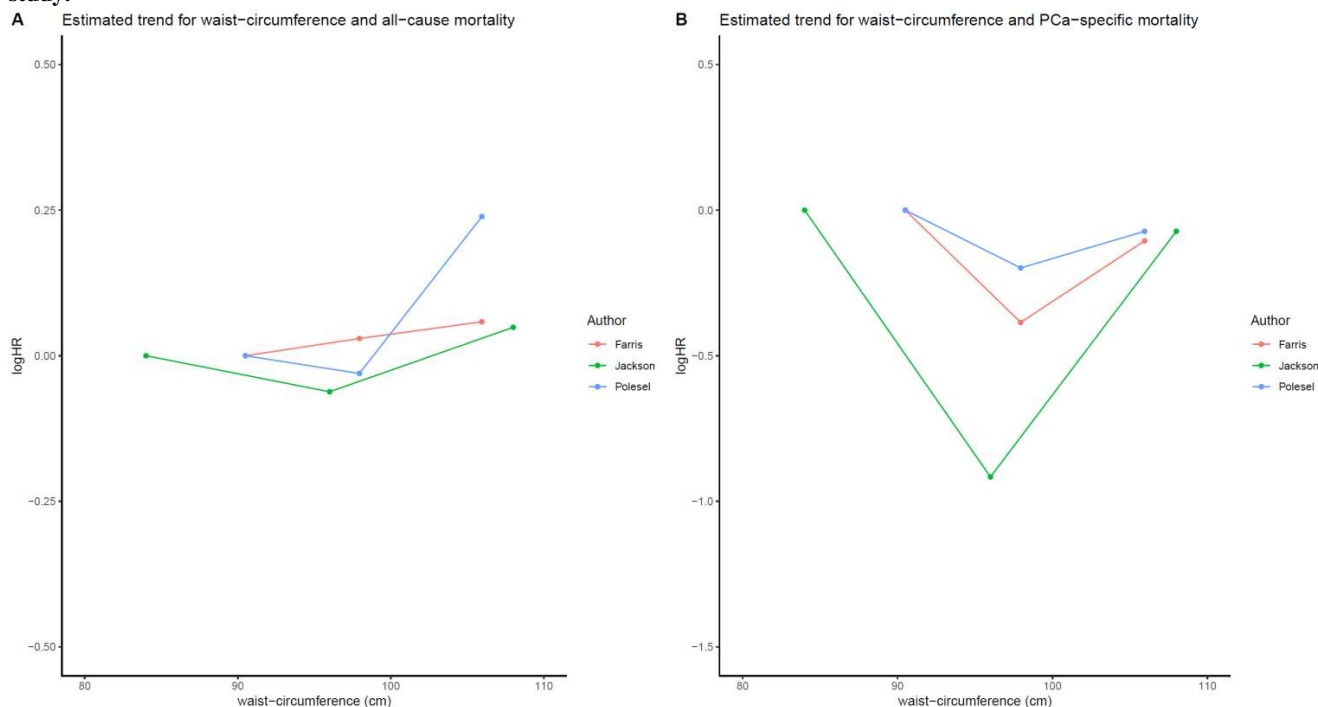

### Risk of bias assessment

**Supplementary Figure 53 Risk of bias assessment of studies included in meta-analyses.**

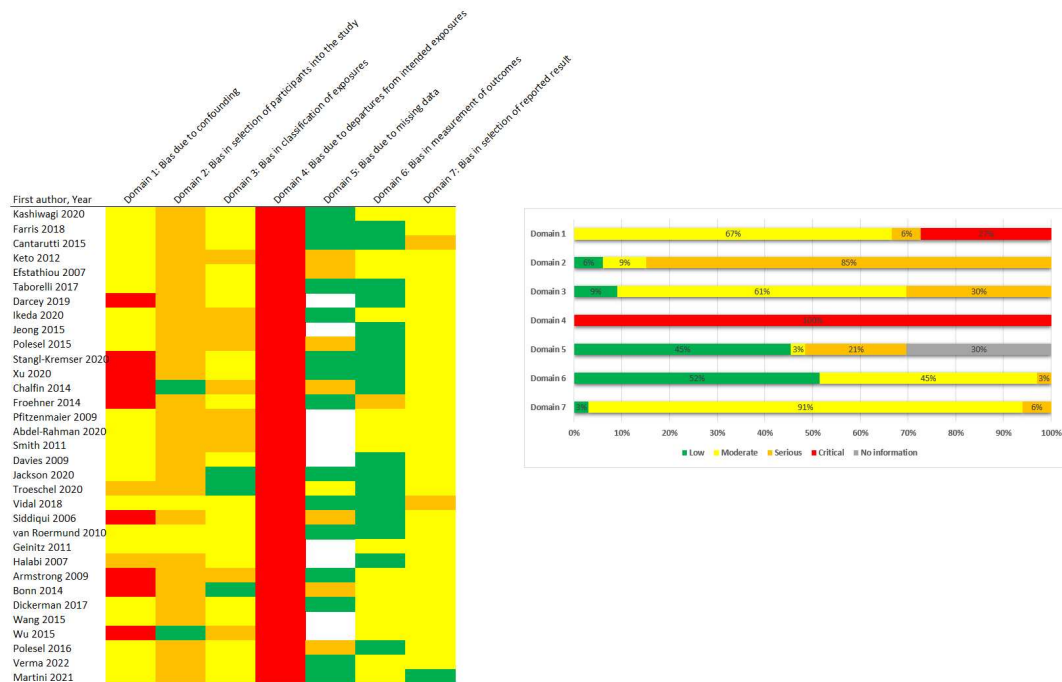

## APPENDIX 2: BMI and secondary outcomes (cardiovascular (CVD)-related mortality and non-PCa-specific mortality), descriptive overview

### BMI and secondary outcomes of interest, descriptive overview

#### *BMI and CVD-related mortality.*

Three studies investigated post-diagnosis BMI and CVD-mortality.<sup>1-3</sup> One<sup>1</sup> reported an association between post-diagnosis adiposity and CVD-mortality (HR per 5 kg/m<sup>2</sup>=1.10, 95%CI:1.01-1.19). The other two studies reported no associations.

#### *BMI and Non-PCa-specific mortality*

Eight studies<sup>4-11</sup> investigated postdiagnosis BMI and non-PCa-specific mortality. Only one<sup>9</sup> reported that median BMI $\geq$ 27.4 kg/m<sup>2</sup> was associated with higher rate of non-PCSM (HR=2.98, 95%CI:1.04-8.53; p=0.04) in men with unfavourable risk localized PCa initially randomised to radiation therapy with or without hormonal therapy. The other seven studies found no associations.

Other adiposity indices and mortality outcomes, descriptive overview

#### *Hip circumference.*

No studies were identified.

#### *Waist-to-hip ratio.*

Two studies<sup>12, 13</sup> reported no association between waist-to-hip ratio when treated as categorical variable and all-cause and PCa-specific mortality. Jackson et al<sup>12</sup> found a lower risk of PCa-specific mortality per 0.1-unit increment (HR=0.50, 95%CI:0.28-0.93) but this association disappeared upon further adjustment for androgen-deprivation therapy (HR per 0.1-unit increment=0.58, 95%CI:0.31-1.07).

#### *Weight change.*

Four studies<sup>1, 13-15</sup> reported data on weight change (both weight loss and weight gain) with mixed results. Troeschel et al<sup>1</sup> (total men=6,942) found that only in men who gained  $\geq$ 5% body weight had a higher rate of PCa-specific mortality compared to those with stable post-diagnosis weight (HR=1.65, 95%CI:1.21-2.25). Higher rate of all-cause mortality was observed in men who either gained  $\geq$ 5% body weight (HR=1.27, 95%CI:1.12-1.45), lost 3-5% (HR=1.15, 95%CI:1.02 to 1.31) or lost  $\geq$ 5% (HR=1.30, 95%CI:1.16-1.46) compared to maintaining stable post-diagnosis weight. Results were similar upon exclusion of men treated with hormone therapy but slightly stronger (with wider confidence intervals) for 5% weight gain and PCa-specific mortality. Exclusion of follow-up within 2 years of survey completion, yielded similar results except that associations of weight loss with all-cause mortality were stronger suggesting reverse causation. There was no association between post-diagnosis weight gain (3-5 or  $>$ 5% of body weight) or weight loss (3-5 or  $>$ 5% of body weight) as compared to maintaining a stable weight ( $\pm$  <3% body weight) and CVD-mortality. Consistent with Troeschel<sup>1</sup>, Bonn et al<sup>14</sup> (total men=3,214) reported that men who gained more than 5% body weight versus no change in weight had higher rate of PCa-specific mortality (HR=1.93, 95%CI 1.18-3.16) but not with all-cause mortality. Men who lost  $\geq$ 5% body weight versus no change in weight had higher rate of all-cause mortality (HR=1.94, 95%CI:1.41-2.66) but there was no association for PCa-specific mortality. Farris et al<sup>13</sup> (total men=829) investigated weight change (in kg) 2-3 years post-diagnosis:  $<$ -4.5, -4.5 to  $<$ -1.6, -1.6 to  $<$ 1.2 (referent) and  $>$ 1.2 but observed null associations across all categories for all-cause and PCa-specific mortality. Griffin et al<sup>15</sup> (total men=357) examined the impact of weight gain in men undergoing ADT on

PCa prognosis. There was an indication of a higher rate of PCa-specific mortality for weight gain  $\geq 2.3$  kg versus stable or mild weight gain ( $0 \leq 2.2$  kg) however the 95%CI included the null (HR=2.44, 95%CI 0.84-7.11). Similarly, there was no association with all-cause mortality (HR=0.97, 95%CI 0.56-1.68). Comparing weight loss to mild weight gain ( $0 \leq 2.2$  kg), there was a higher rate of all-cause (HR=2.16, 95%CI:1.25-3.74) and PCa-specific mortality (HR=4.73, 95%CI:1.59-14.0). One study<sup>16</sup> reported only on weight loss (defined as  $>10\%$  of weight in a month versus no weight loss) in advanced castration-resistant prostate cancer (CRPC) but found no association with survival. The 95%CIs crossed the null and were very wide.

#### ***Visceral adipose tissue (VAT) and Subcutaneous adipose tissue (SAT)***

Nine studies<sup>11, 17-24</sup> reported data on VAT and SAT indices in relation to mortality outcomes. Pak et al<sup>21</sup> (total men=2,402) showed that subcutaneous fat index (SFI) (HR for SFI  $48 \geq$  versus  $<48=0.70$  95%CI, 0.5-0.98,  $p=0.039$ ) but not visceral fat index (VFI) was associated with lower all-cause mortality in men with castration-resistant PCa treated with docetaxel or androgen receptor signalling inhibitors. Lee et al 2018<sup>23</sup> (total men=282) found that men with higher SFI had lower risk of death from PCa (HR for SFI  $39.9 \geq$  versus  $<39.9$ , 95%CI, 0.48-0.87,  $p=0.004$ ). Xu et al<sup>17</sup> (total men=182) reported that VAT index was associated with lower risk of all-cause mortality (HR=0.99,  $p=0.003$ ) and there was an indication of an inverse association for SAT index and all-cause mortality (HR=0.99,  $p=0.06$ ) but not with VAT/SAT ratio (HR=0.65,  $p=0.21$ ). Wu et al<sup>24</sup> found that patients with high (above median) visceral fat-to-subcutaneous fat ratio (VSR) had worse prognosis in comparison to the low VSR group. The other studies<sup>11, 18-20, 22</sup> did not find any associations with all-cause or prostate cancer-specific mortality.

Two systematic reviews were identified<sup>25, 26</sup> that combined the identified studies in high versus low meta-analysis despite heterogenous cut-offs and included studies with less than 100 individuals. None of these meta-analyses identified associations between visceral adiposity and all-cause or PCa specific mortality (HR high versus low for all-cause mortality=1.07, 95%CI:0.84 to 1.35,  $I^2=52$ , studies=7, for PCa-specific mortality=1.02, 95%CI:0.76 to 1.35,  $I^2=0$ , studies=2<sup>25</sup> and HR high versus low for all-cause mortality=1.03, 95%CI:0.74 to 1.43,  $I^2=52$ , studies=4<sup>26</sup>) but found inverse associations between subcutaneous adipose tissue and mortality (HR high versus low for all-cause mortality=0.69, 95%CI:0.57 to 0.84,  $I^2=0$ , studies=5; for PCa specific mortality=0.73, 95%CI:0.55 to 0.98,  $I^2=0$ , studies=2<sup>25</sup> and HR high versus low for all-cause mortality=0.68, 95%CI:0.54 to 0.84,  $I^2=0$ , studies=3<sup>26</sup>)

## References

1. Troeschel AN, Hartman TJ, Jacobs EJ, *et al.* Postdiagnosis Body Mass Index, Weight Change, and Mortality From Prostate Cancer, Cardiovascular Disease, and All Causes Among Survivors of Nonmetastatic Prostate Cancer. *J Clin Oncol* 2020;38(18):2018-27.
2. Tendulkar RD, Hunter GK, Reddy CA, *et al.* Causes of mortality after dose-escalated radiation therapy and androgen deprivation for high-risk prostate cancer. *Int J Radiat Oncol Biol Phys* 2013;87(1):94-9.
3. Efstathiou JA, Bae K, Shipley WU, *et al.* Cardiovascular mortality after androgen deprivation therapy for locally advanced prostate cancer: RTOG 85-31. *J Clin Oncol* 2009;27(1):92-9.
4. Taborelli M, Polesel J, Parpinel M, *et al.* Fruit and vegetables consumption is directly associated to survival after prostate cancer. *Mol Nutr Food Res* 2017;61(4).
5. Cantarutti A, Bonn SE, Adami HO, *et al.* Body mass index and mortality in men with prostate cancer. *Prostate* 2015;75(11):1129-36.
6. Efstathiou JA, Bae K, Shipley WU, *et al.* Obesity and mortality in men with locally advanced prostate cancer: analysis of RTOG 85-31. *Cancer* 2007;110(12):2691-9.
7. Fang LC, Merrick GS, Butler WM, *et al.* High-risk prostate cancer with Gleason score 8-10 and PSA level  $\leq 15$  ng/mL treated with permanent interstitial brachytherapy. *Int J Radiat Oncol Biol Phys* 2011;81(4):992-6.
8. Merrick GS, Galbreath RW, Butler WM, *et al.* Obesity is not predictive of overall survival following permanent prostate brachytherapy. *Am J Clin Oncol* 2007;30(6):588-96.
9. Nguyen PL, Chen MH, Beard CJ, *et al.* Comorbidity, body mass index, and age and the risk of nonprostate-cancer-specific mortality after a postradiation prostate-specific antigen recurrence. *Cancer* 2010;116(3):610-5.
10. Taira AV, Merrick GS, Butler WM, *et al.* Long-term outcome for clinically localized prostate cancer treated with permanent interstitial brachytherapy. *Int J Radiat Oncol Biol Phys* 2011;79(5):1336-42.
11. Chiang PK, Tsai WK, Chiu AW, *et al.* Muscle Loss During Androgen Deprivation Therapy Is Associated With Higher Risk of Non-Cancer Mortality in High-Risk Prostate Cancer. *Front Oncol* 2021;11:722652.
12. Jackson MD, Tulloch-Reid MK, McCaw-Binns AM, *et al.* Central adiposity at diagnosis may reduce prostate cancer-specific mortality in African-Caribbean men with prostate cancer: 10-year follow-up of participants in a case-control study. *Cancer Causes Control* 2020;31(7):651-62.
13. Farris MS, Courneya KS, Kopciuk KA, *et al.* Anthropometric measurements and survival after a prostate cancer diagnosis. *Br J Cancer* 2018;118(4):607-10.
14. Bonn SE, Wiklund F, Sjölander A, *et al.* Body mass index and weight change in men with prostate cancer: progression and mortality. *Cancer Causes Control* 2014;25(8):933-43.
15. Griffin K, Csizmadia I, Howard LE, *et al.* First-year weight loss with androgen-deprivation therapy increases risks of prostate cancer progression and prostate cancer-specific mortality: results from SEARCH. *Cancer Causes Control* 2019;30(3):259-69.
16. Bournakis E, Efstathiou E, Varkaris A, *et al.* Time to castration resistance is an independent predictor of castration-resistant prostate cancer survival. *Anticancer Res* 2011;31(4):1475-82.
17. Xu MC, Huelster HL, Hatcher JB, *et al.* Obesity is Associated with Longer Survival Independent of Sarcopenia and Myosteatosis in Metastatic and/or Castrate-Resistant Prostate Cancer. *J Urol* 2020.
18. Stangl-Kremser J, Suarez-Ibarrola R, Andrea D, *et al.* Assessment of body composition in the advanced stage of castration-resistant prostate cancer: special focus on sarcopenia. *Prostate Cancer Prostatic Dis* 2020;23(2):309-15.
19. Di Bella CM, Howard LE, Oyekunle T, *et al.* Abdominal and pelvic adipose tissue distribution and risk of prostate cancer recurrence after radiation therapy. *Prostate* 2020.
20. Kashiwagi E, Shiota M, Masaoka H, *et al.* Relationship between body composition and hormone sensitivity for androgen deprivation therapy in patients with metastatic prostate cancer. *Prostate Int* 2020;8(1):22-6.
21. Pak S, Kim MS, Park EY, *et al.* Association of Body Composition With Survival and Treatment Efficacy in Castration-Resistant Prostate Cancer. *Front Oncol* 2020;10:558.
22. Delouya G, Tiberi D, Bhatnagar SR, *et al.* Impact of adipose tissue on prostate cancer aggressiveness - analysis of a high-risk population. *Horm Mol Biol Clin Investig* 2018;36(3).
23. Lee JS, Lee HS, Ha JS, *et al.* Subcutaneous Fat Distribution is a Prognostic Biomarker for Men with Castration Resistant Prostate Cancer. *J Urol* 2018;200(1):114-20.
24. Wu W, Liu X, Chaftari P, *et al.* Association of body composition with outcome of docetaxel chemotherapy in metastatic prostate cancer: a retrospective review. *PLoS One* 2015;10(3):e0122047.
25. Cheng E, Kirley J, Cespedes Feliciano EM, *et al.* Adiposity and cancer survival: a systematic review and meta-analysis. *Cancer Causes Control* 2022;33(10):1219-46.
26. Lopez P, Newton RU, Taaffe DR, *et al.* Associations of fat and muscle mass with overall survival in men with prostate cancer: a systematic review with meta-analysis. *Prostate Cancer Prostatic Dis* 2021;25(4):615-26.
